# Supplementary material for: ‘Building on shaky ground’—challenges to and solutions for primary care guideline implementation in four provinces in South Africa: a qualitative study
Source: PubMed Central journal article supplement — BMJ Open. 2020 May 30;10(5):e031468. doi: 10.1136/bmjopen-2019-031468 (PMC7264636; doi:10.1136/bmjopen-2019-031468), 2020-05-30
Supplement: bmjopen-2019-031468.draft_revisions.pdf [file bmjopen-2019-031468.draft_revisions.pdf]

# BMJ Open

BMJ Open is committed to open peer review. As part of this commitment we make the peer review history of every article we publish publicly available.

When an article is published we post the peer reviewers' comments and the authors' responses online. We also post the versions of the paper that were used during peer review. These are the versions that the peer review comments apply to.

The versions of the paper that follow are the versions that were submitted during the peer review process. They are not the versions of record or the final published versions. They should not be cited or distributed as the published version of this manuscript.

BMJ Open is an open access journal and the full, final, typeset and author-corrected version of record of the manuscript is available on our site with no access controls, subscription charges or pay-per-view fees (<http://bmjopen.bmj.com>).

If you have any questions on BMJ Open's open peer review process please email [info.bmjopen@bmj.com](mailto:info.bmjopen@bmj.com)

# BMJ Open

## 'Building on shaky ground' – challenges to and solutions for primary care guideline implementation in four provinces in South Africa: a qualitative study

|                               |                                                                                                                                                                                                                                                                                                                                                                                                                                                                                                                                                                                                                                                                                                                                                                                                                                                                                                                                                                                                                  |
|-------------------------------|------------------------------------------------------------------------------------------------------------------------------------------------------------------------------------------------------------------------------------------------------------------------------------------------------------------------------------------------------------------------------------------------------------------------------------------------------------------------------------------------------------------------------------------------------------------------------------------------------------------------------------------------------------------------------------------------------------------------------------------------------------------------------------------------------------------------------------------------------------------------------------------------------------------------------------------------------------------------------------------------------------------|
| Journal:                      | <i>BMJ Open</i>                                                                                                                                                                                                                                                                                                                                                                                                                                                                                                                                                                                                                                                                                                                                                                                                                                                                                                                                                                                                  |
| Manuscript ID                 | bmjopen-2019-031468                                                                                                                                                                                                                                                                                                                                                                                                                                                                                                                                                                                                                                                                                                                                                                                                                                                                                                                                                                                              |
| Article Type:                 | Research                                                                                                                                                                                                                                                                                                                                                                                                                                                                                                                                                                                                                                                                                                                                                                                                                                                                                                                                                                                                         |
| Date Submitted by the Author: | 05-May-2019                                                                                                                                                                                                                                                                                                                                                                                                                                                                                                                                                                                                                                                                                                                                                                                                                                                                                                                                                                                                      |
| Complete List of Authors:     | Kredo, Tamara; South African Medical Research Council, Cochrane South Africa; Stellenbosch University Faculty of Medicine and Health Sciences, Department of Medicine, Division of Clinical Pharmacology<br>Cooper, Sara ; South African Medical Research Council, Cochrane South Africa; University of Cape Town Faculty of Health Sciences, School of Public Health and Family Medicine<br>Abrams, Amber; South African Medical Research Council, Cochrane South Africa<br>Muller, Jocelyn; South African Medical Research Council, Cochrane South Africa<br>Schmidt, Bey-Marrié; South African Medical Research Council, Cochrane South Africa<br>Volmink, Jimmy; South African Medical Research Council, Cochrane South Africa; Stellenbosch University Faculty of Medicine and Health Sciences, Deans office and Centre for Evidence Based Health Care<br>Atkins, Salla; Tampere University, New Social Research and Faculty of Social Sciences; Karolinska Institute, Department of Public Health Sciences |
| Keywords:                     | Health policy < HEALTH SERVICES ADMINISTRATION & MANAGEMENT, Protocols & guidelines < HEALTH SERVICES ADMINISTRATION & MANAGEMENT, PRIMARY CARE, QUALITATIVE RESEARCH, Quality in health care < HEALTH SERVICES ADMINISTRATION & MANAGEMENT, PUBLIC HEALTH                                                                                                                                                                                                                                                                                                                                                                                                                                                                                                                                                                                                                                                                                                                                                       |
|                               |                                                                                                                                                                                                                                                                                                                                                                                                                                                                                                                                                                                                                                                                                                                                                                                                                                                                                                                                                                                                                  |

SCHOLARONE™  
Manuscripts

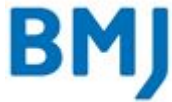

I, the Submitting Author has the right to grant and does grant on behalf of all authors of the Work (as defined in the below author licence), an exclusive licence and/or a non-exclusive licence for contributions from authors who are: i) UK Crown employees; ii) where BMJ has agreed a CC-BY licence shall apply, and/or iii) in accordance with the terms applicable for US Federal Government officers or employees acting as part of their official duties; on a worldwide, perpetual, irrevocable, royalty-free basis to BMJ Publishing Group Ltd ("BMJ") its licensees and where the relevant Journal is co-owned by BMJ to the co-owners of the Journal, to publish the Work in this journal and any other BMJ products and to exploit all rights, as set out in our [licence](#).

The Submitting Author accepts and understands that any supply made under these terms is made by BMJ to the Submitting Author unless you are acting as an employee on behalf of your employer or a postgraduate student of an affiliated institution which is paying any applicable article publishing charge ("APC") for Open Access articles. Where the Submitting Author wishes to make the Work available on an Open Access basis (and intends to pay the relevant APC), the terms of reuse of such Open Access shall be governed by a Creative Commons licence – details of these licences and which [Creative Commons](#) licence will apply to this Work are set out in our licence referred to above.

Other than as permitted in any relevant BMJ Author's Self Archiving Policies, I confirm this Work has not been accepted for publication elsewhere, is not being considered for publication elsewhere and does not duplicate material already published. I confirm all authors consent to publication of this Work and authorise the granting of this licence.

1  
2  
3 **'Building on shaky ground' – challenges to and solutions for primary care guideline implementation in**  
4  
5 **four provinces in South Africa: a qualitative study**  
6

7 Tamara Kredo<sup>1,2</sup>, Sara Cooper<sup>1,3</sup>, Amber Abrams<sup>1</sup>, Jocelyn Muller<sup>1</sup>, Bey-Marrié Schmidt<sup>1</sup>, Jimmy Volmink<sup>6</sup>,  
8  
9 Salla Atkins<sup>7,8</sup>  
10  
11  
12  
13

14 <sup>1</sup> Cochrane South Africa, South African Medical Research Council  
15

16 <sup>2</sup> Division of Clinical Pharmacology, Faculty of Medicine and Health Sciences, Stellenbosch University  
17

18 <sup>3</sup> Division of Social & Behavioural Sciences, School of Public Health and Family Medicine, University of  
19  
20  
21 Cape Town  
22

23 <sup>6</sup> Dean's office and Centre for Evidence Based Health Care, Faculty of Medicine and Health Sciences,  
24  
25 Stellenbosch University  
26

27 <sup>7</sup> Department of Public Health Sciences, Karolinska Institutet, Tomtebodavägen 18A, 17177, Stockholm  
28

29 <sup>8</sup> New Social Research and Faculty of Social Sciences, Tampere University, PO Box 100, Tampere, Finland  
30

31  
32 Corresponding author: Tamara Kredo [tamara.kredo@mrc.ac.za](mailto:tamara.kredo@mrc.ac.za)  
33

34 Emails: Sara Cooper: [sara.cooper@mrc.ac.za](mailto:sara.cooper@mrc.ac.za); Amber Abrams [amberabrams@gmail.com](mailto:amberabrams@gmail.com); Jocelyn Muller  
35

36  
37 [jocelyn.muller@gmail.com](mailto:jocelyn.muller@gmail.com); Bey-Marrie Schmidt [bey-marrie.schmidt@mrc.ac.za](mailto:bey-marrie.schmidt@mrc.ac.za); Jimmy Volmink:  
38

39 [jvolmink@sun.ac.za](mailto:jvolmink@sun.ac.za); Salla Atkins [salla.atkins@tuni.fi](mailto:salla.atkins@tuni.fi)  
40  
41  
42  
43  
44  
45  
46  
47  
48  
49  
50  
51  
52  
53  
54  
55  
56  
57  
58  
59  
60

## Abstract

### Background

Clinical practice guidelines are important tools supporting evidence-informed patient care. In South Africa, although guidelines are usually developed at national level, responsibility for implementation lies with provincial government. This study explored perspectives of provincial and district health managers stakeholders regarding barriers to and enablers for primary care guideline implementation.

### Methods

We used qualitative research methods, comprising in-depth interviews with twenty-two participants in four provinces in South Africa (Eastern Cape, Western Cape, Kwazulu-Natal, Limpopo). We interviewed provincial and district health managers responsible for implementation and/or training. Analysis proceeded with inductive thematic content analysis to develop categories and themes; followed by discussion of results and finalization of themes with a multidisciplinary team.

### Results

Participants recommended urgent consideration of health system challenges, particularly financial constraints impacting on access to both guidelines themselves and to the basic medical equipment and supplies to adhere to the guidelines. They suggested that to overcome health service gaps, leadership should be strengthened, roles clarified and accountability measures, such as audit and feedback, be improved. Participants suggested that the inadequate numbers of skilled nursing and other clinical staff hampered guideline use and ultimately patient care. Quality assurance of training programmes for clinicians, particularly nurses; interdisciplinary training to ensure all staff are included; and strengthening post-training mentorship was recommended. Furthermore, fit for purpose guideline implementation needs to consider the unique settings in each province and district, including local

1  
2  
3 culture and geography. This should start from guideline development stages by including guideline end-  
4  
5 users.  
6  
7  
8  
9

## 10 **Conclusions**

11  
12 Universal health coverage is planned for the coming decade and guidelines are one of the named tools  
13  
14 to achieve evidence-informed, effective healthcare. Increasing access to guidelines and enhancing  
15  
16 training and clinical supervision may enable short to medium term benefits. However, investing in  
17  
18 health system strengthening is a pre-requisite to evidence-informed practice.  
19  
20  
21  
22

23 **Key words:** qualitative research, clinical practice guidelines, implementation, primary care, quality of  
24  
25 care, health systems research, health services research, policy implementation, quality improvement  
26  
27  
28  
29

### 30 **Article summary**

#### 31 32 Strengths and limitations of this study

- 33  
34
- 35 • Clinical practice guidelines are named tools for bridging the gap between policy and  
36  
37 practice to support implementation of equitable and cost-effective health services. Yet,  
38  
39 there is a paucity of research on clinical guidelines from low- and middle-income  
40  
41 countries.  
42  
43
  - 44 • Strengths of the study are that we report interviews with provincial and district health  
45  
46 managers in four culturally and geographically diverse South African provinces.  
47  
48
  - 49 • The qualitative research methods enable us to explore perspectives of those involved  
50  
51 with guideline implementation who shared their views regarding what is working and  
52  
53  
54

1  
2  
3 what can be improved. The research identified two themes impacting guideline

4  
5  
6 implementation: Health system factors and socio-cultural and geographic context.

- 7  
8  
9  
10  
11  
12  
13  
14  
15  
16  
17  
18  
19  
20  
21  
22  
23  
24  
25  
26  
27  
28  
29  
30  
31  
32  
33  
34  
35  
36  
37  
38  
39  
40  
41  
42  
43  
44  
45  
46  
47  
48  
49  
50  
51  
52  
53  
54  
55  
56  
57  
58  
59  
60
- According to participants, several insights emerged for how these factors might be addressed: Strengthening the health system through adequate financial investment and ensuring availability of medical equipment and supplies are necessary for guideline adherence.
  - Strengthening leadership and putting in place constructive accountability measures, including appropriate use of audit and feedback.
  - Quality assurance of training programmes for primary health care providers, particularly nurses, and facilitating interdisciplinary training to ensure all staff are adhering to guidelines.
  - Mentorship and clinical support are provided through District Clinical Specialists but requires further strengthening.
  - Consideration of the unique settings in each province, including culture, geography and social needs is required to ensure effective implementation.
  - Limitations of the study include that there are many primary care guidelines available in South Africa with different target users. Further interviews may elucidate additional specific barriers to and enablers of guideline implementation. Furthermore, the health system is an evolving environment, and continuous research of this kind is likely necessary to keep abreast of developments to inform guideline implementation.

## Background

Primary health care (PHC) remains an important focus globally and part of the foundation for Universal Health Coverage (UHC)(1). The South African government, like other lower- and middle-income countries, have indicated a commitment to enhancing in primary care for UHC (2-4). However, PHC has had faltering progress at best, and despite political will, investment has not been sufficient to overcome challenges posed by colliding communicable and non-communicable epidemics alongside recognized health system deficiencies (5, 6). Health outcomes remain poor relative to other middle-income countries with similar health spend; and healthcare remains inequitably distributed within a two tiered public and private system where 40% of the health budget is consumed by the private sector, despite serving 17% of the population (7-9).

In South Africa, several strategic initiatives aim to address health system fragmentation, including PHC re-engineering, with emphasis on district health system strengthening; and advancing policy planning for National Health Insurance (6, 10, 11). These initiatives place importance on clinical governance, with clinical practice guidelines (CPGs) one named strategy for healthcare strengthening.

CPGs are recognized tools for health policy implementation and quality improvement (12-14). Evidence-informed CPGs aim to recommend effective diagnostic, prevention and management interventions, while minimising harm, within the limits of what a health system can afford. In South Africa, at least 175 CPGs have been developed since 2012, largely for management of non-communicable diseases and mostly by the Department of Health (15). While the number of CPGs available may be substantial, they provide no benefit if inadequately implemented. Studies in South Africa and elsewhere have found potential implementation gaps where, despite the availability of CPGs, clinical care does not meet required standards (16-21).



1  
2  
3  
4  
5 Evidence-to-practice gaps pose a substantial challenge and the how best to overcome them has been a  
6  
7 longstanding debate (22-25). There are checklists available that outline potential approaches for best -  
8  
9 practice CPG implementation (26-28). However, which strategies work, under which conditions, remains  
10  
11 a complex and evolving research field. Generally, tailored, multifaceted interventions addressing specific  
12  
13 barriers may be better, but the benefit to health or process outcomes is often modest at best and  
14  
15 difficult to extrapolate to different contexts (25, 29, 30). Increasingly, theory-informed approaches are  
16  
17 used to design the complex interventions required to change behavior, yet the cost of doing this relative  
18  
19 to the benefit remains unclear (31-34). In South Africa, several trials evaluating evidence-informed  
20  
21 approaches for CPG implementation find a small, but consistent benefit from targeted strategies, yet,  
22  
23 roll-out of these context-specific strategies remains a gap (35).  
24  
25  
26  
27  
28  
29

30 Given the limited resources allocated to health, particularly in low- and middle-income settings, knowing  
31  
32 how best to intervene in efficient and effective ways is paramount. (36, 37). In this context, exploring  
33  
34 the views of those involved with CPGs is a reasonable way to learn about local needs. The South African  
35  
36 Guidelines Excellence (SAGE) project aimed to understand primary care CPG development,  
37  
38 implementation and capacity needs (38). For the qualitative component of SAGE we interviewed  
39  
40 diverse role players involved in primary care CPG development, implementation and/or use. Elsewhere  
41  
42 we report the findings from national CPG developers (39, 40) and frontline healthcare workers who use  
43  
44 CPGs (33). Related SAGE studies have engaged allied healthcare providers (41-44). In this paper, we  
45  
46 explore findings that emerged amongst health managers occupying senior management roles in the  
47  
48 provincial or district government offices. The district managers include those with strictly management  
49  
50 roles and those with clinical governance and support roles (e.g. members of the District Specialist  
51  
52 Clinical Teams) or those responsible for training. All participants we spoke to have roles in primary care  
53  
54  
55  
56  
57  
58  
59  
60

1  
2  
3 CPG implementation. We aimed to explore their perspectives regarding barriers to and enablers for  
4  
5 primary care CPG implementation in four provinces in South Africa  
6  
7  
8  
9

## 10 **Methods**

### 11 *Design*

12  
13  
14 We used qualitative methods to understand the phenomena under investigation as experienced by  
15  
16 those involved. The methods and study context have been described in detail elsewhere (33), and thus  
17  
18 only a brief summary is provided here, together with more detailed description of participants and  
19  
20 analysis methods used in this paper.  
21  
22  
23  
24

### 25 *Study settings*

26  
27  
28 Over several decades, the South African national government has increased emphasis on PHC services  
29  
30 managed through district offices (6, 45-48). Districts are administrative sub-sections of the province,  
31  
32 usually run as part of the local government. More recently, legislation has been introduced which  
33  
34 supports the implementation of UHC, through a National Health Insurance system (11). However, its  
35  
36 implementation is planned for the decade ahead. In general, national government develops strategies  
37  
38 and CPGs; and provincial governments implement them through regional, district, or community  
39  
40 healthcare facilities (7). Several programmes to strengthen district clinical governance have been  
41  
42 introduced and are linked to CPG implementation: 1) The Ideal Clinic is defined as a 'clinic with good  
43  
44 infrastructure, adequate staff, adequate medicine and supplies, good administrative processes, and  
45  
46 sufficient adequate bulk supplies' includes ensuring access to and use of CPGs (49); and 2) 'primary  
47  
48 health care re-engineering' aims to strengthen district healthcare through ward-based outreach teams;  
49  
50 school health programmes; and District Clinical Specialist Teams (DCSTs)(10). DCSTs include clinical  
51  
52 specialists: family physician, primary health care nurse, obstetrician, advanced midwife, paediatrician,  
53  
54  
55  
56  
57  
58  
59  
60

1  
2  
3 paediatric nurse and anaesthetist. The family physician and primary health care nurse are central to  
4  
5 primary care CPG implementation through their clinical governance role, including provision of training  
6  
7 and mentorship with nationally endorsed CPGs.  
8  
9

### 10 11 12 *Sampling and recruitment*

13  
14 Sampling, both purposive and convenience, took place in four of nine provinces in South Africa chosen  
15  
16 for their diversity in socioeconomic status, geography and cultures: Western Cape, Kwazulu-Natal,  
17  
18 Eastern Cape and Limpopo provinces (33, 46). Within each province, we aimed to interview provincial  
19  
20 and district managers, or district clinical specialists face-to-face at their place of work or preferred  
21  
22 venue, lasting between 30 to 60 minutes. Prior to conducting interviews, we obtained approval from  
23  
24 Provincial Research Units. In the Eastern Cape we were invited to present at a provincial research day,  
25  
26 receiving buy-in for our planned research (33). In the Western Cape we contacted known provincial  
27  
28 policymakers involved with PHC CPGs. In other provinces, we invited individuals recommended by the  
29  
30 Provincial Research units. Once access was negotiated, all those invited agreed to participate.  
31  
32  
33  
34  
35  
36

### 37 *Patient and Public Involvement*

38  
39 CPGs are tools that aim to directly impact patient care and guide clinician-patient engagement. In South  
40  
41 Africa, there is little known from research evidence regarding patients views about CPGs. The research  
42  
43 question was developed with patients in mind, but did not engage patients views in the design, conduct  
44  
45 or analysis. In this SAGE sub-study we were seeking perspectives of health managers in primary care,  
46  
47 and neither patients or the public were included in the sample. The results of the research will be shared  
48  
49 with the participants.  
50  
51  
52  
53

### 54 *Data collection and management*

1  
2  
3 We explored experiences of CPG implementation and use for health service delivery. We used a semi-  
4 structured interview guide, asking about experiences of CPG adaptation and implementation processes  
5 and about potential barriers to and enablers of successful implementation. The guide was adapted  
6 iteratively drawing on insights from previous interviews and included open-ended questions to allow  
7 participants to direct the emphasis of the interview (50). Interviewers received training in interviewing  
8 and two interviewers were present at all interviews. Interviews were conducted in English. There were  
9 no requests for translation despite the various first languages spoken in the provinces. All interviews were  
10 individual, with two exceptions 1) a provincial manager interview in Eastern Cape, where our invited  
11 participant invited two additional colleagues to participate; 2) the district manager interview in Kwazulu-  
12 Natal, where both the district PHC manager and training coordinator were present. One interview, with a  
13 Kwazulu-Natal manager, took place telephonically at their request due to challenges with scheduling.  
14  
15  
16  
17  
18  
19  
20  
21  
22  
23  
24  
25  
26  
27  
28  
29  
30

31 All interviews were recorded. After each interview, reflections and summaries were written to capture  
32 initial insights and to identify points for further exploration in subsequent interviews. Interviews were  
33 transcribed verbatim, and reviewed for accuracy (TK, TM). Data were stored electronically on password-  
34 protected computers; and consent forms stored in a locked cabinet.  
35  
36  
37  
38  
39  
40  
41  
42  
43

### 44 *Analysis*

45 We used an iterative, thematic content analysis approach (50, 51). Two researchers read initial  
46 transcripts (TK, SA) and agreed on the general meaning and main issues presented. One researcher (TK)  
47 then re-read transcripts, performing open coding to explore barriers to and enablers of CPG  
48 implementation, extracting the relevant quotes/coding units. TK then used the quotes to develop the  
49 condensed manifest descriptions, and from these data were placed in categories (52). Categories and  
50 their related quotes were further examined (TK, SC, BS, SA) for manifest and latent meanings and to  
51  
52  
53  
54  
55  
56  
57  
58  
59  
60

1  
2  
3 identify meaningful themes (53). Following this, results were discussed with SA to develop the analysis  
4  
5 further and then presented to all authors for input and verification prior to finalization.  
6  
7  
8  
9

### 10 *Rigour*

11  
12 Credibility was ensured through detailed capturing and description of our approach to sampling, data  
13  
14 collection, data management, and analysis. Quotations were included to provide readers the  
15  
16 opportunity to interpret data, establish confirmability and to show data richness. Complementary  
17  
18 research competencies and experience of the multidisciplinary team of researchers (social science,  
19  
20 medical practice, CPG development and implementation) influenced data interpretation and  
21  
22 strengthened study rigour.  
23  
24  
25  
26  
27

### 28 **Results**

29  
30 Twenty-two interviews were held from September 2015 to August 2016. Participants had previously  
31  
32 worked in clinical positions as nurses (n = 15), or doctors (n = 7), but were currently occupying  
33  
34 management posts. Provincial and district managers were responsible for health service delivery and  
35  
36 worked in PHC generally or specific clinical programmes (e.g. HIV, non-communicable diseases), or in  
37  
38 operational roles. District Clinical Specialists worked at primary and district healthcare facilities  
39  
40 providing clinical governance support. Our final sample included provincial managers representing four  
41  
42 provinces; district managers from two districts in each of the four provinces; and district family  
43  
44 physicians in Limpopo, KZN and Eastern Cape. The Western Cape has not implemented the DCST  
45  
46 programme.  
47  
48  
49  
50  
51  
52

53  
54 Most participants considered CPGs credible sources guiding clinical practice and importantly, believed  
55  
56 that CPGs impact positively on patients' health. Some participants described that CPGs can '*save a life*'.  
57  
58  
59  
60

1  
2  
3 District medical doctors particularly shared views regarding the value of CPGs, stating that they are  
4  
5 *'evidence-based and it works... mortality goes down when we do things properly'*. Further arguments  
6  
7 supporting CPGs included *'harmonisation of practice'*, *'quality improvement'*, and *'rational'* medicine  
8  
9 use.  
10

11  
12  
13 We present the findings within two emergent themes, namely: health system factors and socio-cultural  
14  
15 contextual issues.  
16

### 17 18 19 Health system factors 20

21  
22  
23 Senior provincial managers experienced CPG implementation as challenging, under-resourced, and  
24  
25 sometimes insufficiently planned. They suggested that CPGs were not the issue, but rather the health  
26  
27 systems capacity to support implementation. An experienced senior manager who had worked in  
28  
29 several provinces explained:  
30

31  
32  
33 *training and the guidelines are fine, but the bed rock on which we are building is – we are building on*  
34  
35 *shaky ground* (Provincial manager, doctor, WC)  
36  
37

### 38 39 Financial constraints 40

41  
42 Financial constraints were recurring issues across provinces. One aspect was reflected in the frustration  
43  
44 expressed by some that funding across different conditions was inequitable, with more funding for HIV  
45  
46 and tuberculosis, *'but the other big killers'* such as non-communicable diseases received little or *'no*  
47  
48 *support'*. This situation was driven by international donor funding, which influenced which CPGs were  
49  
50 prioritized for implementation.  
51  
52  
53  
54  
55  
56  
57  
58  
59  
60

1  
2  
3 Access to the right tools and equipment was perceived as a pre-requisite for successful CPG  
4  
5 implementation. However, all participants spoke about budgetary constraints, and resulting lack of, or  
6  
7 poorly serviced, clinic equipment and stocks and the associated impact on implementation. A PHC  
8  
9 district manager expressed concerns, stating:

10  
11  
12  
13 *Budgetary constraints are still a challenge, the systems are still a challenge they are hindering the*  
14  
15 *implementation of these guidelines. For you to get a blood pressure machine, you have to wait for more*  
16  
17 *than 2 months. If this scale is broken, you should follow a tender process for that scale to be repaired, so*  
18  
19 *the systems are killing the implementation of guidelines also, the procurement and supply chain systems.*

20  
21  
22 (District manager, nurse, EC)  
23  
24

25  
26 Furthermore, the simple issue of limited access to CPG copies on site, due to budgetary constraints, was  
27  
28 highlighted as an additional barrier for using CPGs. As captured in this quote from a district doctor in  
29  
30 rural Eastern Cape *'I mean you just lucky if you get them'*.

31  
32  
33 Several district managers also mentioned that *'the challenge is about printing the guidelines'* due to  
34  
35 budget allocations from national government. Solutions were offered to overcome both the poor quality  
36  
37 of, and poor access to, CPG copies. A dominant view was that digital access would mitigate these issues  
38  
39 and increase *'click and check'* CPG access. Several managers suggested, however, that both the book  
40  
41 and digital versions are needed, as a rural district doctor said:

42  
43  
44  
45 *'They [older healthcare providers] like the booklet, but the young ones like the app'* (Provincial manager,  
46  
47 nurse, LPP)  
48  
49

50  
51 Despite many participants highlighting the potential value of increasing digital CPG access, financial  
52  
53 barriers were expressed in all provinces, as some managers suggested:

54  
55  
56 *'no computers, no internet, there's no connection'* (District manager, nurse, KZN)  
57  
58

1  
2  
3 *'I don't think you will find a single computer that's got any connection to anything'* (District manager,  
4  
5 doctor, KZN)  
6

7  
8 In addition, a district manager in an urban context explained the dilemma of investing in digital solutions  
9  
10 in the face of limited funding. She asked: *'do you want to buy more computers, or do you want more*  
11  
12 *medication'* (District manager, nurse, WC)  
13  
14

### 15 16 **Governance and leadership**

17  
18 Senior managers explained that effective CPG implementation required strong governance including  
19  
20 clarity regarding responsibility, and how implementation should be delivered and monitored.  
21  
22

23  
24  
25 *...it's an issue of governance, how is implementation of guidelines governed and whose responsibility is it*  
26  
27 *and do we have enough capacity to manage governance* (Provincial manager2, doctor, WC)  
28  
29

30 District management were perceived as demotivated because of the volume of policies requiring  
31  
32 implementing, leaving them feeling *'completely bombarded and confused'*. In addition, lack of support  
33  
34 for implementation, or in some circumstances the punitive approach taken towards managers struggling  
35  
36 with implementation within very challenging health systems, was demoralizing. A senior manager,  
37  
38 having worked in several provinces with differing infrastructure, described his experience:  
39  
40

41  
42  
43 *There are good people at ground level, but without a level of protection and support they kind of just get*  
44  
45 *nailed. So every new policy is looked upon with dread because you are worried that at some point*  
46  
47 *somebody is going to come and say you are not implementing it* (Provincial manager, doctor, WC)  
48  
49

50 Managers offered solutions explaining that it was not only the remit of public servants to lead CPG  
51  
52 implementation. Community champions and leaders were suggested as additional enablers of CPG  
53  
54 implementation. Within the health workforce, this included senior academics who inspired junior staff;  
55  
56  
57  
58



1  
2  
3 in the community it was community leaders including traditional chiefs or religious leaders who  
4 endorsed local facilities and encouraged patients to follow guidance.  
5  
6

7  
8 Further recommendations to support governance included developing relationships with non-  
9 governmental organizations (NGO), known as 'partners'. Given the limited provincial budgets, partners  
10 were often perceived as the only means for providing training or developing materials for CPG  
11 dissemination. Partners were mentioned, particularly in the Eastern Cape, both at the provincial and  
12 district level, as one district manager explained '*when the guideline is out, we need to call them [NGO  
13 partners] to be part of us*'. The issue of sustainability arose as there was a risk that when NGO funding  
14 ended, services were withdrawn, and local government lacked capacity to maintain the activities,  
15 potentially undermining care.  
16  
17  
18  
19  
20  
21  
22  
23  
24  
25

### 26 27 **Accountability approaches**

28  
29 Several managers suggested accountability mechanisms to enhance implementation. For example, use  
30 of audit and feedback to measure CPG use was an accountability and quality improvement approach  
31 cited by various participants. This approach was reportedly better functioning in certain provinces. A  
32 provincial programme manager in the Western Cape described a constructive experience:  
33  
34  
35  
36  
37  
38

39  
40 *(Based on the) situational analysis and audits ..... we pick up the gaps in quality and we start looking at*  
41 *what is our opportunity to, either tweak a guideline, develop a guideline or a tool or piece of stationary*  
42 *or an algorithm or flow chart that will close that gap (Provincial manager, nurse, WC)*  
43  
44  
45  
46  
47

48 While accountability mechanisms were perceived by some as essential, most managers, on the contrary,  
49 described audits as punitive and obstructive with potential negative consequences. As stated by a  
50 provincial manager:  
51  
52  
53  
54  
55  
56  
57  
58  
59  
60

1  
2  
3 *then comes the monitoring and evaluation people to monitor that thing, not in a nurturing way, but in a*  
4  
5 *'why didn't you hit your targets kind of way' (Provincial manager, doctor, WC)*  
6  
7

8  
9 This concept of punitive audits emerged from several provinces. One senior manager spoke about a  
10  
11 *'compliance culture'* in which focus was directed primarily to what is measurable, such as structural  
12  
13 inputs like infrastructure, and the blame that ensues if these targets are unmet. As described:

14  
15  
16 *... when it comes to focusing on clinical guidelines if no one is auditing that in the same way. So, the*  
17  
18 *Auditor General is this big bogey man out there. If anything goes wrong, then of course the province gets*  
19  
20 *into big trouble. So, there is a lot more gravitas or seriousness attached when the Auditor General says*  
21  
22 *something... (Provincial manager2, doctor, WC).*  
23  
24

25  
26 Another participant from the Eastern Cape provided an analogous account:

27  
28  
29 *We will comply and complain later, if there is a time to complain. But what is emphasized, is compliance.*  
30  
31 *There is that strict compliance. Compliance. If you don't comply, it means you are failing your district, or*  
32  
33 *your sub-district, or your clinic or your people. There is no time for complaining or reflecting, it is*  
34  
35 *compliance. (District manager, nurse, EC)*  
36  
37

38  
39 The compliance culture and aversion to punitive action was thought to have negative effects on CPG  
40  
41 implementation and patient care. Participants indicated how the compliance and audit systems *'just*  
42  
43 *adds to the frustration', 'distracts'* from the focus on clinical care and ultimately results in rushing ahead  
44  
45 to meet targets, or as one manager put it: *'running around like a headless chicken'* (District manager,  
46  
47 nurse, EC).  
48  
49

## 50 51 52 **Human resource constraints** 53 54 55 56 57 58 59

1  
2  
3 Health workforce constraints were emphasised as pertinent to CPG implementation. Managers  
4 described the mismatch between the growing workload and unchanging staff numbers:

5  
6  
7  
8 *we have this burden of disease that is growing. We have resources that are shrinking. So more of our*  
9  
10  
11 *health workers are being asked to do more with less resources (Provincial manager, nurse, WC)*

12  
13  
14 Health workforce barriers to CPG use were described to be three-fold: staff shortages, insufficient time,  
15 and inappropriately qualified staff unable to fulfill required tasks. These issues resulted in staff being  
16  
17  
18  
19  
20  
21  
22  
23  
24  
25  
26  
27  
28  
29  
30  
31  
32  
33  
34  
35  
36  
37  
38  
39  
40  
41  
42  
43  
44  
45  
46  
47  
48  
49  
50  
51  
52  
53  
54  
55  
56  
57  
58  
59  
60  
*'overstretched' and 'not coping'. It was suggested that staff experience considerable time pressures due*  
*to their heavy workloads, 'continuously dealing with patients' as well as pressure from patients wanting*  
*them to work 'fast, fast, fast'. As one provincial manager lamented:*

26  
27  
28  
29  
30  
31  
32  
33  
34  
35  
36  
37  
38  
39  
40  
41  
42  
43  
44  
45  
46  
47  
48  
49  
50  
51  
52  
53  
54  
55  
56  
57  
58  
59  
60  
*...they [nurses] have no time to look at guidelines, they have no time to do quality work to check the*  
*quality issues because they are continuously dealing with patients (Provincial manager, nurse, LPP).*

### Capacity gaps and opportunities

34  
35  
36  
37  
38  
39  
40  
41  
42  
43  
44  
45  
46  
47  
48  
49  
50  
51  
52  
53  
54  
55  
56  
57  
58  
59  
60  
Linked with human resources is capacity building. Training was emphasised as the primary means by  
which CPGs are implemented. Participants generally agreed that to support implementation *'you can't*  
*just automatically know how to do things, you need to be trained'*. Therefore, building skills and  
knowledge was understood as a pre-requisite to changing practice.

#### *Primary care nurse training gaps*

47  
48  
49  
50  
51  
52  
53  
54  
55  
56  
57  
58  
59  
60  
An issue raised mostly by nurse managers was the poor state of professional training of PHC nurses.  
Nurses were described as *'not skilled'* and the nurse training syllabuses *'outdated'*, raising concerns that  
nurses entering practice were inadequately prepared. In the most extreme example, a provincial

1  
2  
3 manager suggested that *'student nurses come out blank....they are the ones that are causing all these*  
4  
5 *deaths.'*

6  
7  
8 Several suggestions were made for optimizing training and support through 1) training delivery  
9  
10 approaches and 2) post-training clinical support.  
11  
12

### 13 14 *Considerations during training*

15  
16 Regarding training itself, access to workshops and ensuring adequate coverage of staff was identified as  
17  
18 a significant challenge. Various participants indicated that *'onsite training is the best one'*, as when  
19  
20 training was delivered off-site, fewer staff could attend, and disseminating learning when back at  
21  
22 facilities was ineffective: *'they [the nurses] don't cascade the information'*. However, *'lack of time'* and  
23  
24 *'budgetary constraints'* to provide training in every facility was their reality. Therefore, finding  
25  
26 contextually appropriate training approaches were suggested, such as *'training local people to be*  
27  
28 *trainers'* and working with NGO's who have more training resources. Furthermore, ensuring DCSTs are  
29  
30 maximally used to provide training were considered key. As a district manager in Limpopo suggested:  
31  
32

33  
34  
35 *DCST staff are now doing the training per facility, no more calling people to a centralized place....and*  
36  
37 *also [doing] the support visit in the facility* (District manager, nurse, LPP)  
38  
39

40  
41 Several participants recommended that training should be interactive, not didactic. Many commended  
42  
43 the practical skills training, so-called *'fire drills'*, used for maternal health training. This training require  
44  
45 staff to demonstrate a response to an emergency during the training, but also subsequently on-site at  
46  
47 unexpected intervals.  
48  
49

50  
51 It was reported that doctors are excluded from training. Ideally, training should be interdisciplinary,  
52  
53 bringing all clinical disciplines onto the same level. As a senior doctor suggested, *'the nurse now knows*  
54  
55 *more than the doctor. So you have to train everybody at the same time.'* (District clinician, doctor, KZN)  
56  
57  
58

### Post-training recommendations

Following training, a critical gap raised repeatedly was the absence of 'clinical support' and 'mentoring'. As a district clinician suggested, 'we desperately, desperately need mentors'. It was emphasized that regardless of access to up-to-date, high quality CPGs, when post-training support is poor, implementation gaps were likely, as captured by the following quote:

*on-site facility mentoring, it's a problem....without that, we can have much, much guidelines, good guidelines, but if there's no on-site mentoring, we are just wasting the government's money* (District clinician, nurse, KZN)

### Socio-cultural and geographic challenges to CPG implementation

In addition to health system factors, socio-cultural and geographic factors were raised by most participants, particularly those in district settings presumably closer to the day-to-day requirements of health service delivery. The explanation given was that there is a mismatch between what is recommended in CPGs and what was acceptable due to culture or feasible due to challenges of living in rural settings.

#### Acceptability and cultural considerations

Several specific CPGs that posed challenges to implementation were mentioned. The CPG recommending voluntary male medical circumcision was emphasized as being at odds with cultural beliefs and norms in settings where traditional circumcision required specific rituals. As one female nurse manager described:

1  
2  
3 .... male circumcision, it is a taboo for me to talk about circumcision. Now you tell people go and do the  
4  
5 medical male circumcision. It is as now you are insulting their culture. (District manager, nurse, EC)  
6  
7

8  
9 Another example related to when mothers with newborns require follow-up clinic visits after delivery,  
10  
11 whereas, in some traditional cultures, leaving home for a specified period post-delivery is frowned upon:  
12  
13  
14 *after birth, she must stay at home until 10 days* (District manager, nurse, EC)  
15  
16

### 17 **Geographic barriers**

18  
19  
20 Geography posed barriers to CPG implementation. The distance and difficult environmental  
21  
22 circumstances under which many patients must travel to attend clinic appointments make the  
23  
24 implementation of certain CPG recommendations unfeasible:  
25  
26

27  
28 *A woman in the Eastern Cape will have to travel 5 kilometers or even more to reach the clinic, so how*  
29  
30 *would you ensure that you reach the clinic 6 days after birth? Those are things that, at times, are*  
31  
32 *impossible when you look at the guidelines.* (District manager, nurse, EC)  
33  
34

35  
36 *in rural areas, people are scattered, and there are rivers when it is raining, they can't go to that facility,*  
37  
38 *.....there was rain for the whole month and then there were floods, and maybe the bridges are then just*  
39  
40 *swept away with the floods. And then people who can't go to that clinic to go and fetch their treatment*  
41  
42 *for diabetes and hypertension.* (Provincial managers, nurses, EC)  
43  
44

### 45 **One size fits all approach to CPG development**

46  
47  
48  
49 Critically, the disparity between CPG recommendations and their feasibility were perceived to result in  
50  
51 unsuccessful CPG implementation and subsequent failure on standardized national indicator 'report  
52  
53 *cards*':  
54  
55  
56  
57  
58

1  
2  
3 *Most of the time we will be Number 0 [on audit reports] ....., because it [the guideline] is not implemented*  
4 *in the Eastern Cape. It's not working. But they [national government] will always say Eastern Cape is*  
5 *Number 0. It's Number 0 because the tool does not fit here, it's [the guideline] is just not right, they are*  
6 *using something which is round in a square hole... (Provincial managers, nurses, EC)*  
7  
8  
9  
10  
11  
12

13 Many provincial managers reported that consultation between national and provincial government was  
14 happening, even prior to finalization of a CPG, to address contextual barriers:  
15

16  
17  
18 *So I think in terms of implementation what I've seen works really well is when people have been part of*  
19 *the process from the policy development side from the word go (Provincial manager, nurse, WC)*  
20  
21  
22

23  
24 However, many participants, particularly district managers did not feel consultations were done  
25 consistently and in meaningful ways to ensure that the final CPGs and linked indicators were aligned  
26 with geographical and cultural contexts. Many felt that CPG content was 'one size fits all' and that  
27 examples of contextually-appropriate implementation were limited.  
28  
29  
30  
31  
32

33  
34 Despite participants emphasizing the importance of context, processes for the contextual adaption of  
35 CPGs was not routinely described. One exception was an example provided about the structured  
36 approach to adopt, adapt, or develop new CPGs in the Western Cape. A provincial manager noted:  
37  
38  
39

40  
41 *either use the policy from national as is or we either translate it for the local context or we develop*  
42 *policy, because national just hasn't done it (Provincial manager, nurse, WC)*  
43  
44  
45  
46  
47  
48  
49

## 50 **Discussion**

51  
52 This study explored perspectives of South African provincial and district health managers on potential  
53 barriers to and enablers of primary care CPG implementation. Two major themes emerged, the first  
54  
55  
56  
57  
58  
59

1  
2  
3 related to broader health system factors such as financial constraints, governance and health workforce  
4 capacity gaps. The second emphasized the importance of socio-cultural and geographic factors, and the  
5 need for CPGs to be adapted to fit local contexts.  
6  
7  
8  
9

10  
11 Regarding health system issues, we found that despite managers' willingness to support PHC CPGs use,  
12 the relative dysfunction of the health system posed barriers to doing so. Aspects of this theme mirrored  
13 several of the often cited WHO health system building blocks, including leadership and governance;  
14 financial arrangements; health service arrangements and implementation strategies, such as training  
15 (54, 55).  
16  
17  
18  
19  
20  
21  
22  
23  
24

25 Strong leadership is required to drive CPG implementation (55, 56). Participants, all of whom occupy  
26 responsible management positions, described governance gaps affecting CPG implementation, a factor  
27 also identified in other studies of countries in sub-Saharan Africa (57). Participants described volumes of  
28 incoming policies without time for consultation, adaptation or planning; and rushed implementation  
29 responding to political drivers rather than healthcare quality considerations. To address this challenge,  
30 managers often partnered with community leaders and NGOs. This was deemed necessary, particularly  
31 in the Eastern Cape, a province where many health system and financial issues were emphasised by our  
32 participants and highlighted in national reports (4, 6). CPG implementation strategies take many forms,  
33 including professional development, dissemination of summary products to patients and healthcare  
34 providers, use of key opinion leaders, to name a few (29). In the South African setting, delegating  
35 responsibility to partners with relevant skills and resources is necessary, however, participants were  
36 concerned about sustainability of donor funded activities.  
37  
38  
39  
40  
41  
42  
43  
44  
45  
46  
47  
48  
49  
50  
51  
52  
53  
54  
55  
56  
57  
58  
59  
60



1  
2  
3 Relatedly, accountability was a reported gap, specifically clarity regarding who is responsible for CPG  
4 implementation and how best to monitor success. For monitoring, audit and feedback was proposed, a  
5 quality improvement strategy premised on the notion that clinicians may change their performance  
6 when they receive feedback regarding sub-standard practice (58). Those we spoke to provided examples  
7 of constructive audit and feedback allowing managers to adapt implementation to address gaps.  
8  
9 However, mostly, audits were experienced as punitive, driving managers to *'comply'* rather than  
10 innovate. A systematic review of 49 trials of audit and feedback found this approach should offer benefit  
11 in CPG implementation (58). Importantly, this review identified success factors that need be considered  
12 including whether the baseline performance of health professionals is low to start with; feedback is  
13 recurrent and given both verbally and in writing; and the process includes clear targets and action plans  
14 (58). Findings from our study suggest that further factors may need to be considered, such as feasibility  
15 and context, to ensure that implementers feel empowered, rather than discouraged or demotivated, by  
16 audit and feedback systems.  
17  
18  
19  
20  
21  
22  
23  
24  
25  
26  
27  
28  
29  
30  
31  
32  
33

34 Most participants described CPG implementation as reactive, rather than proactive, driven by demands  
35 to implement without adequate time or funds to do so effectively. Participants spoke of a *'compliance*  
36 *culture'* and explained that requirements were heavily weighted towards administrative reporting rather  
37 than consideration of clinical quality improvement. Within the field of *'quality of care'* measurement, a  
38 long-standing model posited by Donabedian proposed three measurable facets of quality of care, 1)  
39 structure (e.g. inputs to care such as facilities, staffing); 2) process (e.g. clinical care) and 3) outcomes  
40 (e.g. health outcomes, patient satisfaction) (59, 60). In South Africa, the apparent emphasis on structural  
41 measurement, is unlikely sufficient, as shown by a multi-country cross-sectional study in similarly poor  
42 settings which reported that infrastructure reports correlated poorly with clinical care or CPG  
43 adherence (61). Drawbacks of this narrower structural and process focus have also been described in  
44  
45  
46  
47  
48  
49  
50  
51  
52  
53  
54  
55  
56  
57  
58  
59  
60

1  
2  
3 the UK's National Health Service, where attempts to create efficiency, resulted in '*compliance-oriented*  
4  
5 *bureaucratised management*' and was felt to hinder quality service delivery rather than enable it (62).  
6  
7

8  
9  
10 Financial constraints were identified as critical factors limiting effective CPG implementation. Lack of  
11  
12 basic equipment, and CPG books was described as the norm. Additionally, lack of infrastructure,  
13  
14 including internet or devices, was a perceived barrier to using CPGs. These views mirrored those of PHC  
15  
16 providers in the same districts that we spoke to who described that they would be more likely to use  
17  
18 CPGs if digital access was possible (33). However, like the managers, lack of internet in facilities, and  
19  
20 exorbitant costs of data required for downloading CPGs was a barrier (33).  
21  
22  
23

24  
25 Human resource constraints such as clinical workload and understaffing were another health system  
26  
27 issue hindering CPG implementation, a finding that echoes a sub-study of PHC clinical staff in these  
28  
29 districts (33).  
30  
31  
32

33  
34 Training is the mainstay of capacity building for human resources for health. Training is vital for building  
35  
36 skills and knowledge to implement CPGs, but also as a form of enablement for teams more generally. In  
37  
38 South Africa, like many low- or middle-income settings, nurses are the backbone of PHC services. Yet,  
39  
40 poor quality nurse training, found in our study and others, was a concerning issue associated with  
41  
42 outdated curricula and inaccessible training sites (63).  
43  
44  
45

46  
47  
48 To overcome these challenges, many participants pointed to the importance of post-training clinical  
49  
50 mentorship. When in place, this clinical mentorship was perceived to provide the necessary, case-  
51  
52 based, in-facility support for CPG implementation and role-modelling CPG use. This view has been  
53  
54 reported by other South African studies, in particular a study exploring the Ideal Clinic programme  
55  
56  
57

1  
2  
3 implementation suggested that family doctors in the DCSTs have similar perspectives regarding the  
4  
5 importance of mentorship (64, 65).  
6  
7  
8  
9

10 In addition to health systems issues, the importance of context emerged as a significant theme. Within  
11  
12 the public sector, CPG production in South Africa is generally the responsibility of the National  
13  
14 Department of Health and implementation a provincial mandate, with further devolvement of decision-  
15  
16 making to districts (6). This decentralised approach is advocated globally, particularly for health systems  
17  
18 progressing to UHC to enable more responsive ground-up health services (66). However, from our  
19  
20 participants we learned that the problem with this is two-fold. Firstly, health indicators are aligned with  
21  
22 national strategies, which do not consider differences between provinces. Secondly, local teams lack  
23  
24 time and specific training in the adaptation of the CPGs for their setting. These concerns were also  
25  
26 expressed by national primary care CPG developers, who described that fragmentation between and  
27  
28 within provinces likely hampers implementation (39). According to our participants, implementation of a  
29  
30 'one size fits all' national CPG may result in several negative consequences including poor scores on  
31  
32 national indicators due to unfeasible recommendations that are not adequately implemented ('round  
33  
34 peg in a square hole' analogy); and rushed implementation to align with a national programme or  
35  
36 political drive.  
37  
38  
39  
40  
41  
42

43 Despite, and perhaps because of, the contextual challenges these managers encountered, many of them  
44  
45 described innovative approaches to overcome geographic barriers or cultural issues. For example, a  
46  
47 female nurse manager in the Eastern Cape led the development of a male nurse-led programme for  
48  
49 medical male circumcision because in her setting for women to discuss circumcision is a cultural taboo.  
50  
51 In addition, where geographical barriers arose, such as flooding rivers, district managers tried to provide  
52  
53 vehicles and airtime to community healthcare workers to reach patients. This was not always successful,  
54  
55  
56  
57  
58  
59  
60

1  
2  
3 due to financial barriers and inadequate procurement processes. A number of managers described plans  
4 that required impressive ingenuity and commitment to overcome health system and contextual barriers,  
5  
6 that required impressive ingenuity and commitment to overcome health system and contextual barriers,  
7  
8 despite all odds, and seemingly with little recognition. Additionally, despite the managers' evident  
9  
10 wealth of knowledge, experience and creative solutions, when pressed, there was a notable absence of  
11  
12 examples provided by participants of opportunities to share lessons learned, innovative approaches, and  
13  
14 successes or challenges between and within districts or provinces.  
15

16  
17  
18 Taken together these health system and contextual barriers to CPG implementation are recognized in  
19  
20 various CPG frameworks as potential challenges to implementation (27, 67) . However, arguably, those  
21  
22 frameworks, largely developed in higher-income settings, contain more detail regarding the CPG and  
23  
24 healthcare provider characteristics and less regarding the social, political and contextual factors. In  
25  
26 South Africa, availability of CPGs and motivation of healthcare providers and managers to support CPG  
27  
28 use are less of an issue than those of context and health systems (33).  
29  
30  
31  
32  
33

### 34 Implications for policy and practice

35  
36 Although substantial research about district health services and systems exists in South Africa and  
37  
38 elsewhere, there is a paucity of evidence published through the lens of CPG implementation. CPGs are  
39  
40 amongst the tools used for policy implementation. In this study, participants made recommendations  
41  
42 regarding structural barriers that hinder CPG implementation and ultimately impact patient care.  
43  
44

45 Participants emphasised the importance of strengthening leadership, clarifying roles and putting in place  
46  
47 constructive accountability measures. Skilled nursing and other clinical services are required to address  
48  
49 the health burden, along with the equipment and supplies to deliver their services as recommended by  
50  
51 evidence-informed CPGs. Quality assurance of PHC training programmes, particularly nurses, and  
52  
53 facilitating interdisciplinary training to ensure all staff are adhering to CPGs was suggested. Innovations,  
54  
55  
56  
57  
58  
59  
60

1  
2  
3 such as the DCSTs, are filling a reported gap in providing clinical mentorship, but needs further  
4  
5 strengthening. Finally, effective CPG implementation in health services need to consider the unique  
6  
7 settings in each province, including culture, geography and social needs. Systematic use of available CPG  
8  
9 implementation checklists to explore, understand and plan for implementation will assist to tailor  
10  
11 strategies to address local needs, making best use of limited resources (27, 30, 67).  
12  
13  
14  
15

### 16 Limitations

17  
18 Elsewhere we have discussed limitations within the broader SAGE qualitative study (33, 40). In brief,  
19  
20 exploring CPG implementation for all PHC CPGs encompasses a very broad research area. Many PHC  
21  
22 CPGs are available, each likely has different barriers. However, in our exploratory research, we found  
23  
24 many cross-cutting issues likely to affect most of PHC CPGs, such as access, training and supply chain  
25  
26 factors. Future research can build on our findings and identify CPG-specific barriers and enablers.  
27  
28  
29  
30  
31

32 Regarding this sub-study, a potential limitation is the sample, including provincial and district managers  
33  
34 in four provinces, which may not sufficiently capture all views for this sub-group of the health services.  
35  
36 Additionally, we used a mix of purposive and convenience sampling, resulting in inclusion of participants  
37  
38 who were more likely to be available or responsive. Despite this, common themes emerged and  
39  
40 triangulated between provinces and with previous research. As this is not a static situation, research in  
41  
42 the evolving process to UHC is likely necessary. Finally, we cannot rule out the possibility of response  
43  
44 bias, in which participants respond according to what they believe we want to hear (50). However, from  
45  
46 most participants, many rich issues arose. Using the individual interview approach may have provided a  
47  
48 safe space and achieved the depth that we have been able to capture and share in this paper.  
49  
50  
51  
52  
53

### 54 **Conclusion**

1  
2  
3 UHC is planned for the coming decade with CPGs one of the named tools to achieve evidence-informed,  
4 effective and cost-effective healthcare (11). We found that health system challenges; and socio-cultural  
5 and geographic context are central issues requiring attention for successful CPG implementation. Our  
6 study adds to a body of CPG implementation knowledge providing practical and local insights, from the  
7 perspective of provincial and district health managers, regarding what needs attention to effectively  
8 implement primary care CPGs in lower-resourced settings.  
9  
10  
11  
12  
13  
14  
15  
16  
17  
18

### 19 **List of abbreviations**

|    |      |                                   |
|----|------|-----------------------------------|
| 21 | CPG  | Clinical practice guideline       |
| 22 |      |                                   |
| 23 | DCST | District Clinical Specialist Team |
| 24 |      |                                   |
| 25 | EC   | Eastern Cape                      |
| 26 |      |                                   |
| 27 | HIV  | Human immunodeficiency virus      |
| 28 |      |                                   |
| 29 | KZN  | Kwa-Zulu Natal                    |
| 30 |      |                                   |
| 31 | LPP  | Limpopo                           |
| 32 |      |                                   |
| 33 | PHC  | Primary health care               |
| 34 |      |                                   |
| 35 | UHC  | Universal health coverage         |
| 36 |      |                                   |
| 37 | WC   | Western Cape                      |
| 38 |      |                                   |
| 39 |      |                                   |
| 40 |      |                                   |
| 41 |      |                                   |
| 42 |      |                                   |
| 43 |      |                                   |
| 44 |      |                                   |
| 45 |      |                                   |
| 46 |      |                                   |
| 47 |      |                                   |
| 48 |      |                                   |
| 49 |      |                                   |
| 50 |      |                                   |
| 51 |      |                                   |
| 52 |      |                                   |
| 53 |      |                                   |
| 54 |      |                                   |
| 55 |      |                                   |
| 56 |      |                                   |
| 57 |      |                                   |
| 58 |      |                                   |
| 59 |      |                                   |
| 60 |      |                                   |

### 43 **Declarations**

#### 46 *Ethics approval and consent to participate*

47  
48 The study was approved by the Research Ethics Committees of the South African Medical Research  
49 Council (EC002-2/2014) and Stellenbosch University (N14/02/008). The informed-consent form was sent  
50 to the individuals prior to the interviews and was also explained and confirmed at the start of  
51 interviews. All participants provided individual written informed consent. The names of participants  
52  
53  
54  
55  
56  
57  
58  
59  
60

1  
2  
3 have been captured and have restricted access. We referred to the Consolidated criteria for reporting  
4  
5 qualitative research (COREQ) to ensure comprehensive reporting (36).  
6  
7  
8  
9

10 *Consent for publication*

11  
12 Not applicable  
13  
14  
15

16 *Availability of data and material*

17  
18 The datasets generated and/or analysed during the current study are not publicly available as this may  
19  
20 be linked to specific clinic staff that were interviewed and as such is not available open use data.  
21  
22

23 Should anyone wish to have access or is interested in further exploration of the data, you may contact  
24  
25 the author: [tamara.kredo@mrc.ac.za](mailto:tamara.kredo@mrc.ac.za).  
26  
27  
28  
29

30 *Competing interests*

31  
32 TK has contributed evidence to the National Department of Health Essential Drugs List Adult level  
33  
34 standard treatment guideline (non-funded); and facilitated workshops and capacity development for  
35  
36 under and post-graduate students, researchers, policymakers and practitioners on clinical practice  
37  
38 guidelines and evidence-informed practices. JV has been involved in guideline development globally and  
39  
40 regionally, he has been on advisory committees for clinical guidelines in the Western Province and has  
41  
42 facilitated workshops and capacity development for under and postgraduate students, researchers and  
43  
44 practitioners on clinical practice guidelines and evidence-informed practices. SC, SA, AA, BS and JM have  
45  
46 no competing interests to declare.  
47  
48  
49

50 No financial competing interests to declare for any contributors to this research.  
51  
52  
53

54 *Funding*  
55  
56  
57  
58

1  
2  
3 This research is supported through a grant from the Flagships Awards Project by the South African  
4  
5 Medical Research Council (SAMRC-RFA-IFSP-01-2013/ SAGE).  
6  
7  
8  
9

### 10 *Authors' contributions*

11  
12 TK drafted the protocol, with input from JV, and AA, amongst others involved with the initial SAGE  
13  
14 project. TK, AA and JM were involved with data collection. TK, SA, JV, AA, JM, SC and BM contributed to  
15  
16 discussions regarding analysis of findings. TK drafted the manuscript, with input from all authors. All  
17  
18 authors approved the final version of the manuscript.  
19  
20  
21  
22

### 23 *Acknowledgements*

24  
25 We would like to thank all those who participated in the research, giving us time from their  
26  
27 management duties and helping us to understand the clinical guideline implementation landscape in  
28  
29 South Africa. Many thanks also to several Cochrane South Africa staff and researchers who assisted with  
30  
31 the project including Tebogo Mokganyetji, Karen Daniels, Michelle Galloway, and Joy Oliver.  
32  
33  
34  
35  
36  
37  
38

### 39 **References**

- 40  
41  
42 1. World Health Organization. The World Health Report 2008: Primary Health Care: (Now More  
43 than Ever) Geneva:: World Health Organization; 2008 [Available from:  
44 <https://www.who.int/whr/2008/en/>.  
45  
46 2. Department of Health SA. Strategic Plan: Department of Health 2014/2015 - 2018/2019. In:  
47 Department of Health, editor. Pretoria: Government; 2014.  
48  
49 3. Department of Health SA. The 10 Point Plan Medium Term Strategic Framework. In: Department  
50 of Health, editor. 2009.  
51  
52 4. Kautzky K, Tollman SM. A perspective on Primary Health Care in South Africa : Primary Health  
53 Care : in context. South African Health Review. 2008;2008(1):17-30.  
54  
55 5. Pillay-van Wyk V, Msemburi W, Laubscher R, Dorrington RE, Groenewald P, Glass T, et al.  
56 Mortality trends and differentials in South Africa from 1997 to 2012: second National Burden of Disease  
57 Study. The Lancet Global health. 2016;4(9):e642-53.  
58  
59 6. Mayosi BM, Lawn JE, van Niekerk A, Bradshaw D, Abdool Karim SS, Coovadia HM. Health in  
60 South Africa: changes and challenges since 2009. Lancet. 2012;380(9858):2029-43.



7. Rispel L. Analysing the progress and fault lines of health sector transformation in South Africa. 2016. In: South African Health Review 2016+  
[Internet]. Durban: Health Systems Trust. Available from: <http://www.hst.org.za/publications/south-african-health-review-2016>.
8. Lorenzoni L, Roubal T. International Comparison of South African Private Hospital Price Levels. 2016.
9. National Treasury. Inter-governmental Fiscal reviews - Provincial Budgets and Expenditure Review: 2010/11 - 2016/17. Pretoria: National Treasury of the Republic of South Africa; 2015.
10. Naledi T BP, Schneider H. Primary Health Care in SA since 1994 and Implications of the New Vision for PHC reengineering. In: Padarath A ER, editor. South African Health Review 2011. Durban: Health Systems Trust; 2011.
11. Department of Health SA. National Health Insurance for South Africa - towards universal health coverage (White Paper). In: Department of Health, editor. Pretoria: Government; 2015.
12. World Health Organization. WHO Handbook for guideline development 2008 January 2011; (August 2010). Available from: [http://www.searo.who.int/LinkFiles/RPC\\_Handbook\\_Guideline\\_Development.pdf](http://www.searo.who.int/LinkFiles/RPC_Handbook_Guideline_Development.pdf).
13. Institute of Medicine. Clinical Practice Guidelines We Can Trust. Graham R, Mancher M, Wolman DM, Greenfield S, Steinberg E, editors. Washington, DC: The National Academies Press; 2011. 290 p.
14. Kredo T, Bernhardsson S, Machingaidze S, Young T, Louw Q, Ochodo E, et al. Guide to clinical practice guidelines: the current state of play. *Int J Qual Health Care*. 2016;28(1):122-8.
15. Wilkinson M, Wilkinson T, Kredo T, MacQuilkan K, Mudara C, Winch A, et al. South African clinical practice guidelines: A landscape analysis. *S Afr Med J*. 2017;108(1):23-7.
16. Cullum N, Sheldon T, Watt I, West P, Wright J. Assessment of NICE guidance. *Lancet*. 2004;364(9429):136; author reply 7.
17. Spyridonidis D, Calnan M. Opening the black box: A study of the process of NICE guidelines implementation. *Health Policy*. 2011;102(2-3):117-25.
18. Runciman WB, Hunt TD, Hannaford NA, Hibbert PD, Westbrook JI, Coiera EW, et al. CareTrack: assessing the appropriateness of health care delivery in Australia. *Med J Aust*. 2012;197(2):100-5.
19. Seddon ME, Marshall MN, Campbell SM, Roland MO. Systematic review of studies of quality of clinical care in general practice in the UK, Australia and New Zealand. *Qual Health Care*. 2001;10(3):152-8.
20. Ncube NB, Solanki GC, Kredo T, Lalloo R. Antibiotic prescription patterns of South African general medical practitioners for treatment of acute bronchitis. *S Afr Med J*. 2017;107(2):119-22.
21. Mash B, Rhode H, Pather M, Ainslie G, Irusen E, Bheekie A, et al. Quality of asthma care: Western Cape province, South Africa. *S Afr Med J*. 2009;99(12):892-6.
22. Grol R. Implementing guidelines in general practice care. *Qual Health Care*. 1992;1(3):184-91.
23. Grol R, Wensing M. What drives change? Barriers to and incentives for achieving evidence-based practice. *Med J Aust*. 2004;180(6 Suppl):S57-60.
24. Grol R, Wensing M, Eccles M, Davis D. Improving Patient Care: The Implementation of Change in Health Care. Second Edition ed. United Kingdom: John Wiley & Sons, Ltd; 2013.
25. Grimshaw J, Thomas R, MacLennan G, Fraser C, Ramsay C. Effectiveness and efficiency of guideline dissemination and implementation strategies. *Health Technology Assessment*. 2004;8(6):84.
26. Schünemann HJ, Wiercioch W, Etzeandía I, Falavigna M, Santesso N, Mustafa R, et al. Guidelines 2.0: systematic development of a comprehensive checklist for a successful guideline enterprise. *Canadian Medical Association Journal*. 2014;186(3):E123-E42.

- 1  
2  
3 27. Gagliardi AR, Marshall C, Huckson S, James R, Moore V. Developing a checklist for guideline  
4 implementation planning: review and synthesis of guideline development and implementation advice.  
5 *Implementation Science*. 2015;10(1):19.
- 6 28. Gagliardi AR, Brouwers MC, Palda VA, Lemieux-Charles L, Grimshaw JM. How can we improve  
7 guideline use? A conceptual framework of implementability. *Implement Sci*. 2011;6:26.
- 8 29. Pantoja T, Opiyo N, Lewin S, Paulsen E, Ciapponi A, Wiysonge CS, et al. Implementation  
9 strategies for health systems in low-income countries: an overview of systematic reviews. *Cochrane*  
10 *Database Syst Rev*. 2017;9:CD011086.
- 11 30. Baker R, Camosso-Stefinovic J, Gillies C, Shaw EJ, Cheater F, Flottorp S, et al. Tailored  
12 interventions to address determinants of practice. *Cochrane Database of Systematic Reviews*. 2015(4).
- 13 31. Michie S, van Stralen MM, West R. The behaviour change wheel: a new method for  
14 characterising and designing behaviour change interventions. *Implement Sci*. 2011;6:42.
- 15 32. French SD, McKenzie JE, O'Connor DA, Grimshaw JM, Mortimer D, Francis JJ, et al. Evaluation of  
16 a theory-informed implementation intervention for the management of acute low back pain in general  
17 medical practice: the IMPLEMENT cluster randomised trial. *PLoS One*. 2013;8(6):e65471.
- 18 33. Kredo T, Cooper S, Abrams A, Muller J, Volmink J, Atkins S. Using the behavior change wheel to  
19 identify barriers to and potential solutions for primary care clinical guideline use in four provinces in  
20 South Africa. *BMC Health Services Research*. 2018;18(1):965.
- 21 34. Nilsen P. Making sense of implementation theories, models and frameworks. *Implement Sci*.  
22 2015;10:53.
- 23 35. Fairall L, Cornick R, Bateman E. Empowering frontline providers to deliver universal primary  
24 healthcare using the Practical and Approach to care kit. *BMJ Global Health*. 2018;3(Suppl 5):bmjgh-2018-  
25 k4451rep.
- 26 36. Chinnock P, Siegfried N, Clarke M. Is evidence-based medicine relevant to the developing world?  
27 *PLoS Med*. 2005;2(5):e107.
- 28 37. Young T, Garner P, Clarke M, Volmink J. Evidence-based health care and policy in Africa: past,  
29 present, and future. *J Clin Epidemiol*. 2016.
- 30 38. Kredo T, Machingaidze S, Louw Q, Young T, Grimmer K. South African Guideline Excellence  
31 (SAGE): What's in a name? *S Afr Med J*. 2016;106(1):18-20.
- 32 39. Kredo T, Abrams A, Young T, Louw Q, Volmink J, Daniels K. Primary care clinical practice  
33 guidelines in South Africa: qualitative study exploring perspectives of national stakeholders. *BMC Health*  
34 *Serv Res*. 2017;17(1):608.
- 35 40. Kredo T, Cooper S, Abrams A, Daniels K, Volmink J, Atkins S. National stakeholders' perceptions  
36 of the processes that inform the development of national clinical practice guidelines for primary  
37 healthcare in South Africa. *Health Res Policy Syst*. 2018;16(1):68.
- 38 41. Dizon JM, Grimmer K, Louw Q, Machingaidze S, Parker H, Pillen H. Barriers and enablers for the  
39 development and implementation of allied health clinical practice guidelines in South African primary  
40 healthcare settings: a qualitative study. *Health Research Policy and Systems*. 2017;15(1):79.
- 41 42. Dizon JM, Grimmer K, Machingaidze S, McLaren P, Louw Q. Mapping South African allied health  
42 primary care clinical guideline activity: establishing a stakeholder reference sample. *Health Res Policy*  
43 *Syst*. 2016;14(1):77.
- 44 43. Dizon JM, Grimmer KA, Machingaidze S, Louw QA, Parker H. South African primary health care  
45 allied health clinical practice guidelines: the big picture. *BMC Health Serv Res*. 2018;18(1):48.
- 46 44. Louw Q, Dizon JM, Grimmer K, McCaul M, Kredo T, Young T. Building capacity for development  
47 and implementation of clinical practice guidelines. *S Afr Med J*. 2017;107(9):745-6.
- 48 45. Statistics South Africa. Mid-year population estimates Pretoria, South Africa,  
49 <http://www.statssa.gov.za/> 31 July 2017. Contract No.: P0302.
- 50  
51  
52  
53  
54  
55  
56  
57  
58  
59  
60

- 1
- 2
- 3
- 4 46. Day C, Gray, A. . Health and related indicators. In: Padarath. A B, P., editor. South African Health
- 5 Review Durban, South Africa: Health Systems Trust; 2017. p. 217-340.
- 6 47. Department of Health SA. White Paper for the Transformation of the Health System in South
- 7 Africa #17910. In: Department of Health, editor. Pretoria1997.
- 8 48. Matsoso MP, Fryatt R. National Health Insurance: the first 16 months. S Afr Med J.
- 9 2013;103(3):156-8.
- 10 49. Department of Health. Ideal Clinic South Africa [Available from: <https://www.idealclinic.org.za>.
- 11 50. Green J. Thorogood N. Qualitative Methods for Health Research. Third ed. Silverman D, editor.
- 12 London: SAGE; 2004.
- 13 51. Graneheim UH, Lundman B. Qualitative content analysis in nursing research: concepts,
- 14 procedures and measures to achieve trustworthiness. Nurse Education Today. 2003;24(2):105-12.
- 15 52. Saldana J. The coding manual for qualitative researchers. Los Angeles, CA: SAGE; 2009
- 16 53. Malterud K. Qualitative research: standards, challenges, and guidelines. The
- 17 Lancet.358(9280):483-8.
- 18 54. Health systems evidence: Taxonomy of governance, financial and delivery arrangements and
- 19 implementation strategies within health systems [Internet]. McMaster Health Forum. 2017 [cited 17
- 20 February 2019]. Available from: [https://www.mcmasterforum.org/docs/default-](https://www.mcmasterforum.org/docs/default-source/resources/hse_taxonomy.pdf?sfvrsn=4)
- 21 [source/resources/hse\\_taxonomy.pdf?sfvrsn=4](https://www.mcmasterforum.org/docs/default-source/resources/hse_taxonomy.pdf?sfvrsn=4).
- 22 55. World Health Organization. Monitoring the building blocks of health systems: a handbook of
- 23 indicators and their measurement strategies. Geneva, Switzerland: World Health Organization; 2010.
- 24 Available from: <https://www.who.int/healthinfo/systems/monitoring/en/>.
- 25 56. Herrera CA, Lewin S, Paulsen E, Ciapponi A, Opiyo N, Pantoja T, et al. Governance arrangements
- 26 for health systems in low-income countries: an overview of systematic reviews. Cochrane Database Syst
- 27 Rev. 2017;9:CD011085.
- 28 57. Ngidi WH, Naidoo JR, Ncama BP, Luvuno ZPB, Mashamba-Thompson TP. Mapping evidence of
- 29 interventions and strategies to bridge the gap in the implementation of the prevention of mother-to-
- 30 child transmission of HIV programme policy in sub-Saharan countries: A scoping review. 2017. 2017;9(1).
- 31 58. Ivers N, Jamtvedt G, Flottorp S, Young JM, Odgaard-Jensen J, French SD, et al. Audit and
- 32 feedback: effects on professional practice and healthcare outcomes. Cochrane Database Syst Rev.
- 33 2012(6):CD000259.
- 34 59. Donabedian A. The Quality of Care: How Can It Be Assessed? JAMA. 1988;260(12):1743-8.
- 35 60. M Campbell S, Roland M, Buetow S. Defining Quality of Care2001. 1611-25 p.
- 36 61. Leslie HH, Sun Z, Kruk ME. Association between infrastructure and observed quality of care in 4
- 37 healthcare services: A cross-sectional study of 4,300 facilities in 8 countries. PLOS Medicine.
- 38 2017;14(12):e1002464.
- 39 62. Dixon-Woods M, Baker R, Charles K, Dawson J, Jerzembek G, Martin G, et al. Culture and
- 40 behaviour in the English National Health Service: overview of lessons from a large multimethod study.
- 41 BMJ quality & safety. 2014;23(2):106-15.
- 42 63. Patience NTS, Sibiyi NM, Gwele NS. Evidence of application of the Basic Antenatal Care
- 43 principles of good care and guidelines in pregnant women's antenatal care records. 2016. 2016;8(2).
- 44 64. Nkosi ZZ, Asah F, Pillay P. Post-basic nursing students' access to and attitudes toward the use of
- 45 information technology in practice: a descriptive analysis. Journal of nursing management.
- 46 2011;19(7):876-82.
- 47 65. Department of Health SA. Ideal Clinic- Components and Definition. In: Department of Health,
- 48 editor. Pretoria: Government; 2014.
- 49 66. Cobos Munoz D, Merino Amador P, Monzon Llamas L, Martinez Hernandez D, Santos Sancho JM.
- 50 Decentralization of health systems in low and middle income countries: a systematic review. Int J Public
- 51 Health. 2017;62(2):219-29.
- 52
- 53
- 54
- 55
- 56
- 57
- 58
- 59
- 60

1  
2  
3 67. Flottorp SA, Oxman AD, Krause J, Musila NR, Wensing M, Godycki-Cwirko M, et al. A checklist for  
4 identifying determinants of practice: a systematic review and synthesis of frameworks and taxonomies  
5 of factors that prevent or enable improvements in healthcare professional practice. *Implement Sci.*  
6 2013;8:35.  
7  
8  
9  
10  
11  
12  
13  
14  
15  
16  
17  
18  
19  
20  
21  
22  
23  
24  
25  
26  
27  
28  
29  
30  
31  
32  
33  
34  
35  
36  
37  
38  
39  
40  
41  
42  
43  
44  
45  
46  
47  
48  
49  
50  
51  
52  
53  
54  
55  
56  
57  
58  
59  
60

For peer review only

Consolidated criteria for reporting qualitative research (COREQ): a 32-item checklist for interviews and focus groups

SAGE provincial managers paper

1 May 2019

| No / Item                                      | Guide questions/description                                                                                                                              | Section in paper                                                                    |
|------------------------------------------------|----------------------------------------------------------------------------------------------------------------------------------------------------------|-------------------------------------------------------------------------------------|
| <b>Domain 1: Research team and reflexivity</b> |                                                                                                                                                          |                                                                                     |
| <b>Personal Characteristics</b>                |                                                                                                                                                          |                                                                                     |
| 1. Interviewer/facilitator                     | Which author/s conducted the interview or focus group?                                                                                                   | Details provided in methods and in previous publications                            |
| 2. Credentials                                 | What were the researcher's credentials? E.g. PhD, MD                                                                                                     | Provided in methods                                                                 |
| 3. Occupation                                  | What was their occupation at the time of the study?                                                                                                      | Outlined in methods                                                                 |
| 4. Gender                                      | Was the researcher male or female?                                                                                                                       | All female, but not considered relevant in the context of health manager interviews |
| 5. Experience and training                     | What experience or training did the researcher have?                                                                                                     | Outlined in methods                                                                 |
| <b>Relationship with participants</b>          |                                                                                                                                                          |                                                                                     |
| 6. Relationship established                    | Was a relationship established prior to study commencement?                                                                                              | Described in sampling                                                               |
| 7. Participant knowledge of the interviewer    | What did the participants know about the researcher? e.g. personal goals, reasons for doing the research                                                 | Interviewers not known to participants                                              |
| 8. Interviewer characteristics                 | What characteristics were reported about the interviewer/facilitator? e.g. Bias, assumptions, reasons and interests in the research topic                | Outlined in methods and limitations                                                 |
| <b>Domain 2: study design</b>                  |                                                                                                                                                          |                                                                                     |
| <b>Theoretical framework</b>                   |                                                                                                                                                          |                                                                                     |
| 9. Methodological orientation and Theory       | What methodological orientation was stated to underpin the study? e.g. grounded theory, discourse analysis, ethnography, phenomenology, content analysis | Thematic content analysis outlined in methods                                       |
| <b>Participant selection</b>                   |                                                                                                                                                          |                                                                                     |
| 10. Sampling                                   | How were participants selected? e.g. purposive, convenience, consecutive, snowball                                                                       | Detail in methods                                                                   |
| 11. Method of approach                         | How were participants approached? e.g. face-to-face, telephone, mail, email                                                                              | Included in methods                                                                 |
| 12. Sample size                                | How many participants were in the study?                                                                                                                 | Outlined in results                                                                 |

|                                        |                                                                                   |                                                                     |
|----------------------------------------|-----------------------------------------------------------------------------------|---------------------------------------------------------------------|
| 13. Non-participation                  | How many people refused to participate or dropped out? Reasons?                   | Included in methods                                                 |
| Setting                                |                                                                                   |                                                                     |
| 14. Setting of data collection         | Where was the data collected? e.g. home, clinic, workplace                        | Provided in methods and previous publications                       |
| 15. Presence of non-participants       | Was anyone else present besides the participants and researchers?                 | Included in methods                                                 |
| 16. Description of sample              | What are the important characteristics of the sample? e.g. demographic data, date | Relevant details provided in methods                                |
| Data collection                        |                                                                                   |                                                                     |
| 17. Interview guide                    | Were questions, prompts, guides provided by the authors? Was it pilot tested?     | Approach outlined in methods and guide provided in appendix         |
| 18. Repeat interviews                  | Were repeat interviews carried out? If yes, how many?                             | n/a                                                                 |
| 19. Audio/visual recording             | Did the research use audio or visual recording to collect the data?               | Use of digital recordings described in methods                      |
| 20. Field notes                        | Were field notes made during and/or after the interview or focus group?           | Described in methods                                                |
| 21. Duration                           | What was the duration of the interviews or focus group?                           | Described in methods                                                |
| 22. Data saturation                    | Was data saturation discussed?                                                    | Not discussed, but considered triangulation between different sites |
| 23. Transcripts returned               | Were transcripts returned to participants for comment and/or correction?          | Not done                                                            |
| <b>Domain 3: analysis and findings</b> |                                                                                   |                                                                     |
| Data analysis                          |                                                                                   |                                                                     |
| 24. Number of data coders              | How many data coders coded the data?                                              | Details of analysis in methods                                      |
| 25. Description of the coding tree     | Did authors provide a description of the coding tree?                             | Not provided here                                                   |
| 26. Derivation of themes               | Were themes identified in advance or derived from the data?                       | Described in methods, derived from data                             |
| 27. Software                           | What software, if applicable, was used to manage the data?                        | Not used                                                            |

|                                  |                                                                                                                                   |                                                    |
|----------------------------------|-----------------------------------------------------------------------------------------------------------------------------------|----------------------------------------------------|
| 28. Participant checking         | Did participants provide feedback on the findings?                                                                                | Not done                                           |
| Reporting                        |                                                                                                                                   |                                                    |
| 29. Quotations presented         | Were participant quotations presented to illustrate the themes / findings? Was each quotation identified? e.g. participant number | Provided in results with identifier                |
| 30. Data and findings consistent | Was there consistency between the data presented and the findings?                                                                | Yes                                                |
| 31. Clarity of major themes      | Were major themes clearly presented in the findings?                                                                              | Yes, headings outlined major themes and categories |
| 32. Clarity of minor themes      | Is there a description of diverse cases or discussion of minor themes?                                                            | Differing views are included                       |



# BMJ Open

## 'Building on shaky ground' – challenges to and solutions for primary care guideline implementation in four provinces in South Africa: a qualitative study

|                                 |                                                                                                                                                                                                                                                                                                                                                                                                                                                                                                                                                                                                                                                                                                                                                                                                                                                                                                                                                                                                                  |
|---------------------------------|------------------------------------------------------------------------------------------------------------------------------------------------------------------------------------------------------------------------------------------------------------------------------------------------------------------------------------------------------------------------------------------------------------------------------------------------------------------------------------------------------------------------------------------------------------------------------------------------------------------------------------------------------------------------------------------------------------------------------------------------------------------------------------------------------------------------------------------------------------------------------------------------------------------------------------------------------------------------------------------------------------------|
| Journal:                        | <i>BMJ Open</i>                                                                                                                                                                                                                                                                                                                                                                                                                                                                                                                                                                                                                                                                                                                                                                                                                                                                                                                                                                                                  |
| Manuscript ID                   | bmjopen-2019-031468.R1                                                                                                                                                                                                                                                                                                                                                                                                                                                                                                                                                                                                                                                                                                                                                                                                                                                                                                                                                                                           |
| Article Type:                   | Research                                                                                                                                                                                                                                                                                                                                                                                                                                                                                                                                                                                                                                                                                                                                                                                                                                                                                                                                                                                                         |
| Date Submitted by the Author:   | 01-Nov-2019                                                                                                                                                                                                                                                                                                                                                                                                                                                                                                                                                                                                                                                                                                                                                                                                                                                                                                                                                                                                      |
| Complete List of Authors:       | Kredo, Tamara; South African Medical Research Council, Cochrane South Africa; Stellenbosch University Faculty of Medicine and Health Sciences, Department of Medicine, Division of Clinical Pharmacology<br>Cooper, Sara ; South African Medical Research Council, Cochrane South Africa; University of Cape Town Faculty of Health Sciences, School of Public Health and Family Medicine<br>Abrams, Amber; South African Medical Research Council, Cochrane South Africa<br>Muller, Jocelyn; South African Medical Research Council, Cochrane South Africa<br>Schmidt, Bey-Marrié; South African Medical Research Council, Cochrane South Africa<br>Volmink, Jimmy; South African Medical Research Council, Cochrane South Africa; Stellenbosch University Faculty of Medicine and Health Sciences, Deans office and Centre for Evidence Based Health Care<br>Atkins, Salla; Tampere University, New Social Research and Faculty of Social Sciences; Karolinska Institute, Department of Public Health Sciences |
| <b>Primary Subject Heading</b>: | Global health                                                                                                                                                                                                                                                                                                                                                                                                                                                                                                                                                                                                                                                                                                                                                                                                                                                                                                                                                                                                    |
| Secondary Subject Heading:      | Evidence based practice, General practice / Family practice, Health services research, Qualitative research                                                                                                                                                                                                                                                                                                                                                                                                                                                                                                                                                                                                                                                                                                                                                                                                                                                                                                      |
| Keywords:                       | Health policy < HEALTH SERVICES ADMINISTRATION & MANAGEMENT, Protocols & guidelines < HEALTH SERVICES ADMINISTRATION & MANAGEMENT, PRIMARY CARE, QUALITATIVE RESEARCH, Quality in health care < HEALTH SERVICES ADMINISTRATION & MANAGEMENT, PUBLIC HEALTH                                                                                                                                                                                                                                                                                                                                                                                                                                                                                                                                                                                                                                                                                                                                                       |
|                                 |                                                                                                                                                                                                                                                                                                                                                                                                                                                                                                                                                                                                                                                                                                                                                                                                                                                                                                                                                                                                                  |

SCHOLARONE™  
Manuscripts





I, the Submitting Author has the right to grant and does grant on behalf of all authors of the Work (as defined in the below author licence), an exclusive licence and/or a non-exclusive licence for contributions from authors who are: i) UK Crown employees; ii) where BMJ has agreed a CC-BY licence shall apply, and/or iii) in accordance with the terms applicable for US Federal Government officers or employees acting as part of their official duties; on a worldwide, perpetual, irrevocable, royalty-free basis to BMJ Publishing Group Ltd ("BMJ") its licensees and where the relevant Journal is co-owned by BMJ to the co-owners of the Journal, to publish the Work in this journal and any other BMJ products and to exploit all rights, as set out in our [licence](#).

The Submitting Author accepts and understands that any supply made under these terms is made by BMJ to the Submitting Author unless you are acting as an employee on behalf of your employer or a postgraduate student of an affiliated institution which is paying any applicable article publishing charge ("APC") for Open Access articles. Where the Submitting Author wishes to make the Work available on an Open Access basis (and intends to pay the relevant APC), the terms of reuse of such Open Access shall be governed by a Creative Commons licence – details of these licences and which [Creative Commons](#) licence will apply to this Work are set out in our licence referred to above.

Other than as permitted in any relevant BMJ Author's Self Archiving Policies, I confirm this Work has not been accepted for publication elsewhere, is not being considered for publication elsewhere and does not duplicate material already published. I confirm all authors consent to publication of this Work and authorise the granting of this licence.

1  
2  
3 **'Building on shaky ground' – challenges to and solutions for primary care guideline implementation in**  
4  
5 **four provinces in South Africa: a qualitative study**  
6

7 Tamara Kredo<sup>1,2</sup>, Sara Cooper<sup>1,3</sup>, Amber Abrams<sup>1</sup>, Jocelyn Muller<sup>1</sup>, Bey-Marrié Schmidt<sup>1</sup>, Jimmy Volmink<sup>6</sup>,  
8  
9 Salla Atkins<sup>7,8</sup>  
10  
11  
12  
13

14 <sup>1</sup> Cochrane South Africa, South African Medical Research Council  
15

16 <sup>2</sup> Division of Clinical Pharmacology, Faculty of Medicine and Health Sciences, Stellenbosch University  
17

18 <sup>3</sup> Division of Social & Behavioural Sciences, School of Public Health and Family Medicine, University of  
19  
20  
21 Cape Town  
22

23 <sup>6</sup> Dean's office and Centre for Evidence Based Health Care, Faculty of Medicine and Health Sciences,  
24  
25 Stellenbosch University  
26

27 <sup>7</sup> Department of Public Health Sciences, Karolinska Institutet, Tomtebodavägen 18A, 17177, Stockholm  
28

29 <sup>8</sup> New Social Research and Faculty of Social Sciences, Tampere University, PO Box 100, Tampere, Finland  
30

31  
32 Corresponding author: Tamara Kredo [tamara.kredo@mrc.ac.za](mailto:tamara.kredo@mrc.ac.za)  
33

34 Emails: Sara Cooper: [sara.cooper@mrc.ac.za](mailto:sara.cooper@mrc.ac.za); Amber Abrams [amberabrams@gmail.com](mailto:amberabrams@gmail.com); Jocelyn Muller  
35

36 [jocelyn.muller@gmail.com](mailto:jocelyn.muller@gmail.com); Bey-Marrie Schmidt [bey-marrie.schmidt@mrc.ac.za](mailto:bey-marrie.schmidt@mrc.ac.za); Jimmy Volmink:  
37

38 [jvolmink@sun.ac.za](mailto:jvolmink@sun.ac.za); Salla Atkins [salla.atkins@tuni.fi](mailto:salla.atkins@tuni.fi)  
39  
40  
41  
42  
43  
44  
45  
46  
47  
48  
49  
50  
51  
52  
53  
54  
55  
56  
57  
58  
59  
60

**Abstract****Objectives:**

Clinical guidelines support evidence-informed quality patient care. Our study explored perspectives of South African sub-national health managers regarding barriers to and enablers for implementation for all available primary care guidelines.

**Design:**

We used qualitative research methods, including semi-structured, individual interviews and an interpretative perspective. Thematic content analysis was used to develop data categories and themes.

**Setting:**

We visited four of nine South African provinces with diverse geographic, economic and health system arrangements (Eastern Cape, Western Cape, Kwazulu-Natal, Limpopo). South Africa is a middle-income country with high levels of inequality. The settings represented public sector rural and peri-urban health facilities.

**Participants:**

Twenty-two participants with provincial and district health management roles, that comprised implementation and/or training on primary care guidelines, were included in the study.

**Results:**

Participants recommended urgent consideration of health system challenges, particularly financial constraints impacting on access to guidelines themselves and to medical equipment and supplies to adhere to guidelines. They suggested that overcoming service delivery gaps requires strengthening of leadership; clarification of roles and enhanced accountability. Participants suggested that inadequate numbers of skilled clinical staff hampered guideline use and ultimately patient care. Quality assurance of training programmes for clinicians, particularly nurses; interdisciplinary training; and strengthening post-training mentorship was recommended. Furthermore, fit-for-purpose guideline implementation

necessitates considering the unique settings of facilities, including local culture and geography. This requires guideline development to include guideline end-users.

## Conclusions

Guidelines are one of the policy tools to achieve evidence-informed, cost-effective and universal healthcare. But, if not effectively implemented, guidelines risk having no impact. Sub-national health managers in poorly resourced settings suggested that shortcomings in the health system, along with poor consultation with end-users, affects implementation. Short-term improvements are possible through increasing access to and training on guidelines. However, health system strengthening and recognition of socio-cultural-geographic diversity, are pre-requisites for context-appropriate evidence-informed practice.

**Key words:** qualitative research, clinical practice guidelines, implementation, primary care, quality of care, health systems research, health services research, policy implementation, quality improvement

### Strengths and limitations of this study

- The qualitative research methods enable us to explore in-depth perspectives of those involved with guideline implementation regarding what is working and what can be improved in a lower income setting with high levels of inequality.
- We report interviews with provincial and district health managers in four culturally and geographically diverse South African provinces, that likely reflect settings in other low-and-middle income countries.
-

- There are many primary care guidelines available in South Africa with different target users, further interviews may elucidate specific barriers to and enablers of guideline implementation.
- The health system is an evolving environment, and continuous research of this kind is necessary to keep abreast of developments to inform effective guideline implementation.

For peer review only

## Background

Primary health care, often a first point of contact for people within a public health system, aims to provide comprehensive, accessible, quality, cost-effective care throughout a person's life (1-3). A functioning primary health care system is considered indicative of a strong health system and a necessary precursor to achieving Universal Health Coverage (UHC) (2, 3). Despite clear goals and several multi-national agreements over several decades, a 2017 World Bank and WHO report measuring UHC success stated that at least half of the global population does not yet access basic health services (4).

Like many lower- and middle-income countries, South Africa has committed to enhancing primary care for UHC (5-7). However, despite political will encompassed in the white paper for a National Health Insurance Scheme to fund UHC, the investment has not been sufficient to overcome challenges posed by colliding communicable and non-communicable epidemics alongside recognized health system deficiencies (8-10). Health outcomes remain poor relative to other middle-income countries with similar health spend; and healthcare remains inequitably distributed within a two tiered public and private system where 40% of the health budget is consumed by the private sector, despite serving 17% of the population (11-13). Several strategic initiatives aim to address health system deficiencies in the country, including PHC re-engineering, with emphasis on strengthening district health managers; and advancing policy planning for National Health Insurance (9, 14, 15). These initiatives place importance on clinical governance, with clinical practice guidelines (CPGs) one named strategy for healthcare strengthening. CPGs are recognized tools for health policy implementation and quality improvement (16-18). Evidence-informed CPGs aim to recommend effective prevention, diagnostic, and treatment interventions, while minimising harm, within the limits of what a health system can afford. In South Africa, at least 175 CPGs have been developed since 2012, largely for management of non-communicable diseases and mostly by

1  
2  
3 the Department of Health (19). While the number of CPGs available may be substantial, they provide no  
4  
5 benefit if inadequately implemented. Studies in South Africa and elsewhere have found potential  
6  
7 implementation gaps where, despite the availability of CPGs, clinical care does not meet required  
8  
9 standards (20-25).

10  
11  
12  
13  
14 Evidence-to-practice gaps pose a substantial challenge in all healthcare settings and the question of how  
15  
16 best to overcome them has been a longstanding debate (26-29). There are checklists available that  
17  
18 outline potential approaches for best -practice CPG implementation (30-32). However, which strategies  
19  
20 work, under which conditions, remains a complex and evolving research field. Generally, tailored,  
21  
22 multifaceted interventions addressing specific barriers may be better, but the benefit to health or  
23  
24 process outcomes is often modest at best and difficult to extrapolate to different contexts (29, 33, 34).  
25  
26 Increasingly, theory-informed approaches are used to design the complex interventions required to  
27  
28 change behavior, yet the cost of doing this relative to the benefit remains unclear (35-38). In South  
29  
30 Africa, several trials evaluating evidence-informed approaches for CPG implementation find a small, but  
31  
32 consistent benefit from targeted strategies, yet, roll-out of these context-specific strategies remains a  
33  
34 gap (39).  
35  
36  
37  
38  
39  
40

41 Given the limited resources allocated to health, particularly in low- and middle-income settings such as  
42  
43 South Africa, knowing how best to intervene in efficient and effective ways is paramount (40, 41). In  
44  
45 this context, exploring the views of those involved with CPGs is a reasonable way to learn about local  
46  
47 needs. The South African Guidelines Excellence (SAGE) project aimed to understand primary care CPG  
48  
49 development, implementation and capacity needs (42). For the qualitative component of SAGE, we  
50  
51 interviewed diverse role players involved in primary care CPG development, implementation and/or use.  
52  
53  
54 Elsewhere we report the findings from national CPG developers (43, 44) and frontline healthcare  
55  
56  
57  
58  
59  
60

1  
2  
3 workers who use CPGs (37). Related SAGE studies have engaged allied healthcare providers regarding  
4 CPG development and implementation (45-48). In this paper, we build on previous work but aim to  
5 delve further into the area of health system and service governance to explore the perspectives of  
6 provincial or district health managers who have responsibility for CPG implementation. The district  
7 managers include those with strictly management roles and those with clinical governance and support/  
8 training roles (e.g. members of the District Specialist Clinical Teams) or those responsible for training. All  
9 participants we spoke to have roles in primary care CPG implementation. We aimed to explore their  
10 perspectives regarding barriers to and enablers for primary care CPG implementation in four provinces  
11 in South Africa  
12  
13  
14  
15  
16  
17  
18  
19  
20  
21  
22  
23  
24

## 25 **Methods**

### 26 *Design*

27  
28 We used qualitative methods from an interpretative paradigm to understand the phenomena under  
29 investigation as experienced by primary care guideline implementers. The methods and study context  
30 have been described in detail elsewhere (37), and thus only a brief summary is provided here, together  
31 with a detailed description of participants and analysis methods used in this paper.  
32  
33  
34  
35  
36  
37  
38  
39  
40

### 41 *Study settings*

42  
43 South Africa is an upper middle-income country with a population of 58.8 million in 2019 (49); and its  
44 populations face amongst the highest rates of inequality globally (50). Over several decades, the South  
45 African national government has increased emphasis on PHC services managed through their 44 district  
46 offices across nine provinces, ranging from 2 to 10 districts in each province (9, 49, 51-53). Districts are  
47 administrative sub-sections of the province, usually run as part of the local government. More recently,  
48 legislation has been introduced which supports the implementation of UHC, through a National Health  
49  
50  
51  
52  
53  
54  
55  
56  
57  
58  
59  
60



1  
2  
3 Insurance system (15). In general, national government develops health strategies and CPGs; and  
4 provincial governments implement them through regional, district, or community healthcare facilities  
5 and their providers (11). Primary care providers include nurses, doctors, nutritionists, physiotherapists,  
6 dentists, occupational therapists and social workers. However, primary care clinics are largely nurse-run,  
7 with access to the additional providers intermittently or at larger district facilities. There are several  
8 primary care guidelines endorsed by the national government for public sector use. These include  
9 condition specific guidelines (e.g. basic antenatal care, human immune-deficiency, tuberculosis) or  
10 integrated guidelines (e.g. Essential Medicines list, Adult Primary Care, Integrated Management of  
11 Childhood Illness) (54). Several programmes to strengthen district clinical governance have been  
12 introduced and are linked to CPG implementation: 1) The Ideal Clinic, defined as a 'clinic with good  
13 infrastructure, adequate staff, adequate medicine and supplies, good administrative processes, and  
14 sufficient adequate bulk supplies', includes ensuring access to and use of CPGs (54); and 2) 'primary  
15 health care re-engineering' which aims to strengthen district healthcare management through  
16 community health workers; school health programmes; and District Clinical Specialist Teams  
17 (DCSTs)(14). DCSTs include clinical specialists: family physician, primary health care nurse, obstetrician,  
18 advanced midwife, paediatrician, paediatric nurse and anaesthetist. The family physician and primary  
19 health care nurse are central to primary care CPG implementation through their clinical governance role,  
20 including provision of training and mentorship with nationally endorsed CPGs.  
21  
22  
23  
24  
25  
26  
27  
28  
29  
30  
31  
32  
33  
34  
35  
36  
37  
38  
39  
40  
41  
42  
43  
44  
45

#### 46 *Sampling and recruitment*

47  
48 Sampling took place in four of nine provinces in South Africa, chosen for their diversity in socioeconomic  
49 status, geography and cultures: Western Cape, Kwazulu-Natal, Eastern Cape and Limpopo provinces (37,  
50 51). Within each province, we aimed to interview at least two provincial and five district managers or  
52 district clinical specialists face-to-face at their place of work or preferred venue. Prior to conducting  
53  
54  
55  
56  
57  
58  
59  
60

1  
2  
3 interviews, we obtained approval from Provincial Research Units. In the Eastern Cape we were invited to  
4 present at a provincial research day, receiving buy-in for our planned research (37). In the Western Cape  
5 we contacted known provincial policymakers involved with PHC CPGs. In other provinces, we invited  
6 individuals recommended by the Provincial Research units. Hence sampling was both purposive, as we  
7 sought to include individuals with specific experience in PHC CPG implementation; and through  
8 convenience, when specific individuals, meeting our criteria, were available to be interviewed. Once  
9 access was negotiated, all those invited agreed to participate.  
10  
11  
12  
13  
14  
15  
16  
17  
18  
19  
20

### 21 *Patient and Public Involvement*

22 CPGs are tools that aim to directly impact patient care and guide clinician-patient engagement. In South  
23 Africa, there is little research evidence regarding patients views about CPGs. The research question was  
24 developed with patients in mind, but did not engage patients views in the design, conduct or analysis. In  
25 this SAGE sub-study, we were seeking perspectives of sub-national health managers in primary care, and  
26 neither patients nor the public were included in the sample. The results of the research will be shared  
27 with the participants.  
28  
29  
30  
31  
32  
33  
34  
35  
36  
37  
38

### 39 *Data collection and management*

40 We explored experiences of health managers regarding CPG implementation and use for health service  
41 delivery. Individual interviews were considered most appropriate to provide in-depth insights into  
42 peoples' lived experiences (55). We used a semi-structured interview guide (Supplementary file 1), asking  
43 about experiences of CPG adaptation and implementation processes and about potential barriers to and  
44 enablers of successful implementation. The guide was adapted iteratively, drawing on insights from  
45 previous interviews and included open-ended questions to allow participants to direct the emphasis of  
46 the interview (55). Interviewers received training in interviewing and two interviewers were present at all  
47  
48  
49  
50  
51  
52  
53  
54  
55  
56  
57  
58  
59  
60

1  
2  
3 interviews. TK, a medical doctor with qualitative interview training, lead most interviews, accompanied  
4 by AA, JM or other research team members. Interviews were conducted in English and lasted between 60  
5 – 90 minutes. There were no requests for translation despite the various first languages spoken in the  
6 provinces. All interviews were individual, with two exceptions in which colleagues joined the interview at  
7 the request of the invited participant. One interview, with a Kwazulu-Natal manager, took place  
8 telephonically at their request due to challenges with scheduling.  
9  
10  
11  
12  
13  
14  
15

16  
17  
18  
19 All interviews were recorded. After each interview, reflections and summaries were written to capture  
20 initial insights and to identify points for further exploration in subsequent interviews. Interviews were  
21 transcribed verbatim, and reviewed for accuracy (TK, TM). Data were stored electronically on password-  
22 protected computers; and consent forms stored in a locked cabinet.  
23  
24  
25  
26  
27  
28  
29

### 30 *Analysis*

31  
32 We used an iterative, thematic content analysis approach (55, 56). Three researchers read initial  
33 transcripts (TK, AA, SA) and agreed on the general meaning and main issues presented. One researcher  
34 (TK) then re-read transcripts, performing open coding to explore barriers to and enablers of CPG  
35 implementation, extracting the relevant quotes/coding units. TK then used the quotes to explore the  
36 topics raised, unpack the meanings of statements made, while categorising the arising themes (57).  
37  
38 Categories and their related quotes were further examined (TK, SC, BS, SA) to identify meaningful  
39 themes (58). Following this, results were discussed with SA to develop the analysis further and then  
40 presented to all authors for input and verification prior to finalization. The research team was  
41 interdisciplinary including public health, medical doctors, and social scientists enabling various views to  
42 enrich the interpretation.  
43  
44  
45  
46  
47  
48  
49  
50  
51  
52  
53  
54  
55  
56  
57  
58  
59  
60

### Validity

Credibility was ensured through detailed capturing and description of our approaches including that of sampling, data collection, data management, and analysis (58). Quotations were included to provide readers the opportunity to interpret data, establish confirmability and to show data richness.

Complementary research competencies and experiences of the multidisciplinary team of researchers (social science, medical practice, CPG development and implementation) influenced data interpretation and strengthened study quality. Transferability to a broader readership was demonstrated through information about the sample, setting and provision of a sufficiently detailed report to consider relevance to others. Reflexivity and the researchers' positionings were considered throughout the process of data collection and analysis.

### Results

Twenty semi-structured interviews were held with 22 participants from September 2015 to August 2016 (Table 1). Participants had previously worked in clinical positions as nurses (n = 15), or doctors (n = 7), but were currently occupying management positions. These provincial and district managers were responsible for health service delivery and worked in PHC generally or within specific clinical programmes (e.g. HIV, non-communicable diseases), or in operational roles. District Clinical Specialists worked at primary and district healthcare facilities providing clinical governance support. Our final sample included provincial managers representing four provinces; district managers from two districts in each of the four provinces; and district doctors in Limpopo, KZN and Eastern Cape. The Western Cape has not implemented the DCST programme.

|                                                                                                   |                                                                                                |
|---------------------------------------------------------------------------------------------------|------------------------------------------------------------------------------------------------|
| Provincial and district managers and trainers: primary health care guideline implementation roles | 20 interviews (22 participants)<br><br>Previous clinical disciplines: nurses = 15, doctors = 7 |
|---------------------------------------------------------------------------------------------------|------------------------------------------------------------------------------------------------|

|  |                                                                                                                                                                                                                                                                                                                 |
|--|-----------------------------------------------------------------------------------------------------------------------------------------------------------------------------------------------------------------------------------------------------------------------------------------------------------------|
|  | <i>KwaZulu-Natal</i> : 4 interviews (1 in province, 3 in district offices)<br><i>Limpopo</i> : 4 interviews (2 in province and 2 in district offices)<br><i>Eastern Cape</i> : 6 interviews (2 in province, 4 in district offices)<br><i>Western Cape</i> : 6 interviews (5 in province, 1 in district offices) |
|--|-----------------------------------------------------------------------------------------------------------------------------------------------------------------------------------------------------------------------------------------------------------------------------------------------------------------|

**Table 1. Description of the research participants**

Most participants considered CPGs credible sources guiding clinical practice and importantly, believed that CPGs impact positively on patients' health. Some participants described that CPGs can *'save a life'*. District medical doctors particularly shared views regarding the value of CPGs, stating that they are *'evidence-based and it works... mortality goes down when we do things properly'*. Further sentiments supporting CPGs included *'harmonisation of practice'*, *'quality improvement'*, and *'rational'* medicine use.

Despite widespread belief in the credibility and positive impact of CPGs, participants felt that CPG implementation is currently inadequate and they described face multiple challenges in this regard. We have organised these into two main themes namely: 1) health system factors and 2) socio-cultural contextual issues.

### Health system factors

Provincial managers experienced CPG implementation as challenging, under-resourced, and sometimes insufficiently planned. They suggested that CPGs were not the issue, but rather that the health systems capacity to support implementation was what posed the greatest challenge to implementation. A provincial manager who had worked in several provinces explained: *"training and the guidelines are fine, but the bed rock on which we are building is – we are building on shaky ground"* (Provincial manager, WC)

### Financial constraints

1  
2  
3 Financial constraints were recurring issues across provinces. One aspect was reflected in the frustration  
4 expressed by some that funding across different conditions was inequitable, with more funding for HIV  
5 and tuberculosis, *'but the other big killers'* such as non-communicable diseases received little or *'no*  
6 *support'*. This situation was driven by international donor funding, which influenced which CPGs were  
7 prioritized for implementation.  
8  
9

10  
11  
12 Access to the right tools and equipment was perceived as a pre-requisite for successful CPG  
13 implementation. However, all participants spoke about budgetary constraints, and a resulting lack of, or  
14 poorly serviced, clinic equipment and stocks and the associated impact on CPG implementation. A PHC  
15 district manager expressed concerns, stating:  
16  
17

18  
19  
20 *Budgetary constraints are still a challenge, the systems are still a challenge they are hindering the*  
21 *implementation of these guidelines. For you to get a blood pressure machine, you have to wait for*  
22 *more than 2 months. If this scale is broken, you should follow a tender process for that scale to be*  
23 *repaired, so the systems are killing the implementation of guidelines also, the procurement and*  
24 *supply chain systems. (District manager, EC)*  
25  
26  
27  
28  
29  
30  
31  
32  
33  
34  
35  
36

37 Furthermore, the simple issue of limited access to CPG copies on site, due to budgetary constraints, was  
38 highlighted as an additional barrier for using CPGs. As reflected on by a district doctor in rural Eastern  
39 Cape *'I mean you just lucky if you get them'*.  
40  
41  
42  
43

44 Several district managers also mentioned that *'the challenge is about printing the guidelines'* due to  
45 budget allocations from national government. Solutions were offered to overcome both the poor quality  
46 of, and poor access to, CPG copies. A dominant view was that digital access would mitigate these issues  
47 and increase *'click and check'* CPG access. Several managers suggested, however, that both the book  
48  
49  
50  
51  
52  
53  
54  
55  
56  
57  
58

1  
2  
3 and digital versions are needed; for example, one rural district doctor said: *'They [older healthcare*  
4 *providers] like the booklet, but the young ones like the app'* (Provincial manager, LPP)  
5  
6

7  
8  
9 Despite many participants highlighting the potential value of increasing digital CPG access, financial  
10  
11 barriers were expressed in all provinces, as one manager suggested *'no computers, no internet, there's*  
12 *no connection'* (District manager, KZN). This was repeated by others: *'I don't think you will find a single*  
13 *computer that's got any connection to anything'* (District manager, KZN)  
14  
15  
16

17  
18 In addition, a district manager in an urban context explained the dilemma of investing in digital solutions  
19  
20 in the face of limited funding. She asked: *'do you want to buy more computers, or do you want more*  
21 *medication?'* (District manager, WC).  
22  
23  
24

## 25 26 **Governance and leadership**

27  
28  
29 Senior managers explained that effective CPG implementation required strong governance including  
30  
31 clarity regarding responsibility, and how implementation should be delivered and monitored. *"...it's an*  
32 *issue of governance, how is implementation of guidelines governed and whose responsibility is it and do*  
33 *we have enough capacity to manage governance"* (Provincial manager2, WC).  
34  
35  
36  
37

38  
39 District management were perceived as demotivated because the volume of policies requiring  
40  
41 implementation left them feeling *'completely bombarded and confused'*. In addition, lack of support for  
42  
43 implementation, or in some circumstances the punitive approach taken towards managers struggling  
44  
45 with implementation within very challenging health systems, was perceived as demoralizing. A senior  
46  
47 manager, having worked in several provinces with differing infrastructure, described his experience:  
48  
49  
50

51  
52 *There are good people at ground level, but without a level of protection and support they kind*  
53 *of just get nailed. So every new policy is looked upon with dread because you are worried that*  
54  
55  
56  
57  
58  
59

1  
2  
3 *at some point somebody is going to come and say you are not implementing it* (Provincial  
4  
5 manager, WC)  
6  
7

8 Managers offered various solutions, explaining that it was not only the remit of public servants to lead  
9  
10 CPG implementation. Community champions and leaders were suggested as additional enablers of CPG  
11  
12 implementation. Within the health workforce, this included senior academics who inspired junior staff;  
13  
14 in the community it was community leaders, including traditional chiefs or religious leaders who  
15  
16 endorsed local facilities and encouraged patients to follow guidance.  
17  
18

19  
20 Further recommendations to support governance included developing relationships with non-  
21  
22 governmental organizations (NGO), known as 'partners'. Given the limited provincial budgets, partners  
23  
24 were often perceived as the only means for providing training or developing materials for CPG  
25  
26 dissemination. Partners were mentioned, particularly in the Eastern Cape, both at the provincial and  
27  
28 district level, as one district manager explained '*when the guideline is out, we need to call them [NGO  
29  
30 partners] to be part of us*'. The issue of sustainability arose as there was a risk that when NGO funding  
31  
32 ended, services were withdrawn, and local government lacked capacity to maintain the activities,  
33  
34 potentially undermining care.  
35  
36  
37

### 38 39 **Accountability approaches** 40

41  
42 Several managers suggested accountability mechanisms to enhance implementation. For example,  
43  
44 audits and feedback to measure CPG use was an accountability and quality improvement approach cited  
45  
46 by various participants. This approach was reportedly better functioning in certain provinces. A  
47  
48 provincial programme manager in the Western Cape described a constructive experience:  
49  
50  
51  
52  
53  
54  
55  
56  
57  
58  
59



1  
2  
3 *(Based on the) situational analysis and audits ..... we pick up the gaps in quality and we start*  
4 *looking at what is our opportunity to, either tweak a guideline, develop a guideline or a tool or*  
5 *piece of stationary or an algorithm or flow chart that will close that gap (Provincial manager, WC)*  
6  
7

8  
9  
10 While accountability mechanisms were perceived by some as essential, most managers, on the  
11 contrary, described audits as punitive and obstructive, with potential negative consequences. This  
12 statement by one provincial manager is indicative of many similar statements by others: *"then*  
13 *comes the monitoring and evaluation people to monitor that thing, not in a nurturing way, but in a*  
14 *'why didn't you hit your targets kind of way'" (Provincial manager, WC). This concept of punitive*  
15 *audits emerged from several provinces. One senior manager spoke about a 'compliance culture' in*  
16 *which focus was directed primarily to what is measurable, such as structural inputs like*  
17 *infrastructure, and the blame that ensues if these targets are unmet. "... when it comes to*  
18 *focusing on clinical guidelines if no one is auditing that in the same way. So, the Auditor General is*  
19 *this big bogey man out there. If anything goes wrong, then of course the province gets into big*  
20 *trouble. So, there is a lot more gravitas or seriousness attached when the Auditor General says*  
21 *something..." (Provincial manager, WC).*  
22  
23  
24  
25  
26  
27  
28  
29  
30  
31  
32  
33  
34  
35  
36  
37

38  
39 Another participant from the Eastern Cape provided an analogous account:  
40

41  
42 *"We will comply and complain later, if there is a time to complain. But what is emphasized, is*  
43 *compliance. There is that strict compliance. Compliance. If you don't comply, it means you are*  
44 *failing your district, or your sub-district, or your clinic or your people. There is no time for*  
45 *complaining or reflecting, it is compliance" (District manager, EC).*  
46  
47  
48  
49  
50

51  
52 The compliance culture and aversion to punitive action was thought to have negative effects on CPG  
53 implementation and patient care. Participants indicated how the compliance and audit systems *'just*  
54  
55  
56  
57  
58

1  
2  
3 *adds to the frustration*, *'distracts'* from the focus on clinical care and ultimately results in rushing ahead  
4  
5 to meet targets, or as one manager put it: *'running around like a headless chicken'* (District manager,  
6  
7 EC).

### 11 **Human resource constraints**

14 Health workforce constraints were emphasised as pertinent to CPG implementation. Managers  
15  
16 described the mismatch between the growing workload and unchanging staff numbers: *'we have this*  
17  
18 *burden of disease that is growing. We have resources that are shrinking. So more of our health workers*  
19  
20 *are being asked to do more with less resources'* (Provincial manager, WC)

24 Health workforce barriers to CPG use were described to be three-fold: staff shortages, insufficient time,  
25  
26 and inappropriately qualified staff unable to fulfill required tasks. These issues resulted in staff being  
27  
28 *'overstretched'* and *'not coping'*. It was suggested that staff experience considerable time pressures due  
29  
30 to their heavy workloads, *'continuously dealing with patients'* as well as pressure from patients wanting  
31  
32 them to work *'fast, fast, fast'*. As one provincial manager lamented: *...they [nurses] have no time to look*  
33  
34 *at guidelines, they have no time to do quality work to check the quality issues because they are*  
35  
36 *continuously dealing with patients* (Provincial manager, LPP).

### 41 **Capacity gaps and opportunities**

43 Linked with human resources is capacity building. Training was emphasised as the primary means by  
44  
45 which CPGs are implemented. Participants generally agreed that to support implementation *'you can't*  
46  
47 *just automatically know how to do things, you need to be trained'*. Therefore, building skills and  
48  
49 knowledge was understood as a pre-requisite to changing practice.

#### 53 *Primary care nurse training gaps*

1  
2  
3 An issue raised mostly by nurse managers was the poor state of professional training of PHC nurses.  
4  
5 Nurses were described as *'not skilled'* and the nurse training syllabuses *'outdated'*, raising concerns that  
6  
7 nurses entering practice were inadequately prepared. In the most extreme example, a provincial  
8  
9 manager suggested that *'student nurses come out blank... they are the ones that are causing all these*  
10  
11 *deaths.'*  
12

13  
14  
15 Several suggestions were made for optimizing training and support through 1) training delivery  
16  
17 approaches and 2) post-training clinical support.  
18

### 19 20 21 *Considerations during training*

22  
23 Regarding training itself, access to workshops and ensuring adequate coverage of staff was identified as  
24  
25 a significant challenge. Various participants indicated that *'onsite training is the best one'*, as when  
26  
27 training was delivered off-site, fewer staff could attend, and disseminating learning when back at  
28  
29 facilities was ineffective: *'they [the nurses] don't cascade the information'*. However, *'lack of time'* and  
30  
31 *'budgetary constraints'* to provide training in every facility was their reality. Therefore, finding  
32  
33 contextually appropriate training approaches were suggested, such as *'training local people to be*  
34  
35 *trainers'* and working with NGO's who have more training resources. Furthermore, ensuring DCSTs are  
36  
37 maximally used to provide training were considered key. As a district manager in Limpopo suggested:  
38  
39  
40  
41  
42 *DCST staff are now doing the training per facility, no more calling people to a centralized place... and also*  
43  
44 *[doing] the support visit in the facility* (District manager, LPP)  
45

46  
47 Several participants recommended that training should be interactive, not didactic. Many commended  
48  
49 the practical skills training, so-called *'fire drills'*, used for maternal health training. This training require  
50  
51 staff to demonstrate a response to an emergency during the training, but also subsequently on-site at  
52  
53 unexpected intervals.  
54  
55

1  
2  
3 Despite many challenges outlined for nurses and their training, nurses were still considered to have  
4 better access to training than doctors, resulting in outdated practices by doctors. It was reported that  
5 doctors are excluded from training. Participants recommended that training should be interdisciplinary,  
6 bringing all clinical disciplines onto the same level. As a senior doctor suggested, *'the nurse now knows  
7 more than the doctor. So you have to train everybody at the same time.'* (District clinician, KZN)  
8  
9  
10  
11  
12  
13

### 14 15 *Post-training recommendations*

16  
17 Following training, a critical gap raised repeatedly was the absence of *'clinical support'* and *'mentoring'*.  
18  
19 As a district clinician suggested, *'we desperately, desperately need mentors'*. It was emphasized that  
20 regardless of access to up-to-date, high quality CPGs, when post-training support is poor,  
21 implementation gaps were likely, as captured by the following quote:  
22  
23  
24  
25  
26  
27

28 *on-site facility mentoring, it's a problem... without that, we can have much, much guidelines, good*  
29 *guidelines, but if there's no on-site mentoring, we are just wasting the government's money* (District  
30 clinician, KZN)  
31  
32  
33  
34  
35  
36  
37  
38  
39

## 40 Socio-cultural and geographic challenges to CPG implementation

41  
42  
43 In addition to health system factors, socio-cultural and geographic factors were raised by most  
44 participants, particularly those in district settings presumably closer to the day-to-day requirements of  
45 health service delivery. The explanation given was that there is a mismatch between what is  
46 recommended in CPGs and what was acceptable due to culture or feasible due to challenges of living in  
47 rural settings.  
48  
49  
50  
51  
52  
53  
54

### 55 **Acceptability and cultural considerations**

1  
2  
3 Several specific CPGs that posed challenges to implementation were mentioned. The CPG  
4  
5 recommending voluntary male medical circumcision was emphasized as being at odds with cultural  
6  
7 beliefs and norms in settings where traditional circumcision required specific rituals. As one female  
8  
9 nurse manager described:

10  
11  
12  
13 *.... male circumcision, it is a taboo for me to talk about circumcision. Now you tell people go and do the*  
14  
15 *medical male circumcision. It is as now you are insulting their culture. (District manager, EC)*

16  
17  
18 Another example related to when mothers with newborns require follow-up clinic visits after delivery,  
19  
20 whereas, in some traditional cultures, leaving home for a specified period post-delivery is frowned upon:  
21  
22  
23  
24 *after birth, she must stay at home until 10 days (District manager, EC)*

### 25 26 27 **Geographic barriers**

28  
29  
30 Geography posed barriers to CPG implementation. The distance and difficult environmental  
31  
32 circumstances under which many patients must travel to attend clinic appointments make the  
33  
34 implementation of certain CPG recommendations unfeasible:

35  
36  
37  
38 *A woman in the Eastern Cape will have to travel 5 kilometres or even more to reach the clinic, so how*  
39  
40 *would you ensure that you reach the clinic 6 days after birth? Those are things that, at times, are*  
41  
42 *impossible when you look at the guidelines. (District manager, EC)*

43  
44  
45  
46 *in rural areas, people are scattered, and there are rivers when it is raining, they can't go to that facility,*  
47  
48 *.....there was rain for the whole month and then there were floods, and maybe the bridges are then just*  
49  
50 *swept away with the floods. And then people who can't go to that clinic to go and fetch their treatment*  
51  
52 *for diabetes and hypertension. (Provincial managers, EC)*

### One size fits all approach to CPG development

Critically, the disparity between CPG recommendations and their feasibility were perceived to result in unsuccessful CPG implementation and subsequent failure on standardized national indicator 'report cards':

*Most of the time we will be Number 0 [on audit reports] ....., because it [the guideline] is not implemented in the Eastern Cape. It's not working. But they [national government] will always say Eastern Cape is Number 0. It's Number 0 because the tool does not fit here, it's [the guideline] is just not right, they are using something which is round in a square hole... (Provincial managers, EC)*

Many provincial managers reported that consultation between national and provincial government was happening, even prior to finalisation of a CPG, to address contextual barriers:

*So I think in terms of implementation what I've seen works really well is when people have been part of the process from the policy development side from the word go (Provincial manager, WC)*

However, many participants, particularly district manager, did not feel consultations were done consistently and in meaningful ways to ensure that the final CPGs and linked indicators were aligned with geographical and cultural contexts. Many felt that CPG content was 'one size fits all' and that examples of contextually-appropriate implementation was limited.

Despite participants emphasising the importance of context, processes for the contextual adaption of CPGs were not routinely described. One exception was an example provided about the structured approach to adopt, adapt, or develop new CPGs in the Western Cape. A provincial manager noted:

*either use the policy from national as is or we either translate it for the local context or we develop policy, because national just hasn't done it (Provincial manager, WC)*

## Discussion

This study explored perspectives of South African provincial and district health managers on potential barriers to and enablers of primary care CPG implementation. Two major themes emerged. The first related to broader health system factors, such as financial constraints, governance and health workforce capacity gaps. The second emphasized the importance of socio-cultural and geographic factors, and the need for CPGs to be adapted to fit local contexts.

Regarding health system factors, we found that, despite managers' willingness to support PHC CPGs use, the relative dysfunction of the health system posed barriers to doing so. Aspects of this theme mirrored several of the often cited WHO health system building blocks, including leadership and governance; financial arrangements; health service arrangements and implementation strategies, such as training (59, 60).

Strong leadership is required to drive CPG implementation (60, 61). Participants, all of whom occupy responsible management positions, described governance gaps affecting CPG implementation, a factor also identified in other studies of countries in sub-Saharan Africa (62). Participants described volumes of incoming policies without time for consultation, adaptation or planning; and rushed implementation responding to political drivers rather than healthcare quality considerations. To address this challenge, managers often partnered with community leaders and NGOs. This was deemed necessary, particularly in the Eastern Cape, a province where many health system and financial issues were emphasised by our participants and highlighted in national reports (7, 9). CPG implementation strategies take many forms, including professional development, dissemination of summary products to patients and healthcare providers, use of key opinion leaders, to name a few (33). In the South African setting, delegating

1  
2  
3 responsibility to partners with relevant skills and resources is necessary, however, participants were  
4  
5 concerned about sustainability of donor funded activities.  
6  
7  
8  
9

10 Relatedly, accountability was a reported gap, and in particular clarity regarding who is responsible for  
11  
12 CPG implementation and how best to monitor success. For monitoring, audit and feedback was  
13  
14 proposed, a quality improvement strategy premised on the notion that clinicians may change their  
15  
16 performance when they receive feedback regarding sub-standard practice (63). Those we spoke to  
17  
18 provided examples of constructive audit and feedback allowing managers to adapt implementation to  
19  
20 address gaps. However, mostly, audits were experienced as punitive, driving managers to '*comply*'  
21  
22 rather than innovate. A systematic review of 49 trials of audit and feedback found this approach should  
23  
24 offer benefit in CPG implementation (63). Importantly, this review identified success factors that need  
25  
26 be considered, including whether the baseline performance of health professionals is low to start with;  
27  
28 feedback is recurrent and given both verbally and in writing; and the process includes clear targets and  
29  
30 action plans (63). Findings from our study suggest that further factors may need to be considered, such  
31  
32 as feasibility and context, to ensure that implementers feel empowered, rather than discouraged or  
33  
34 demotivated, by audit and feedback systems.  
35  
36  
37  
38  
39  
40

41 Most participants described CPG implementation as reactive, rather than proactive, driven by demands  
42  
43 to implement without adequate time or funds to do so effectively. Participants spoke of a '*compliance*  
44  
45 *culture*' and explained that requirements were heavily weighted towards administrative reporting rather  
46  
47 than consideration of clinical quality improvement. Within the field of 'quality of care' measurement, a  
48  
49 long-standing model posited by Donabedian proposed three measurable facets of quality of care: 1)  
50  
51 structure (e.g. inputs to care such as facilities, staffing); 2) process (e.g. clinical care) and 3) outcomes  
52  
53 (e.g. health outcomes, patient satisfaction) (64, 65). In South Africa, the apparent emphasis on structural  
54  
55  
56  
57  
58  
59  
60



1  
2  
3 measurement, is unlikely sufficient, as shown by a multi-country cross-sectional study in similarly poor  
4 settings which found that infrastructure reports correlated poorly with clinical care or CPG adherence  
5 (66). Drawbacks of this narrower structural and process focus have also been described in the UK's  
6 National Health Service, where attempts to create efficiency resulted in '*compliance-oriented*  
7 *bureaucratized management*' and was felt to hinder quality service delivery rather than enable it (67).  
8  
9

10  
11  
12 Financial constraints were identified as critical factors limiting effective CPG implementation. Lack of  
13 basic equipment, and CPG books was described as the norm. Additionally, lack of infrastructure,  
14 including internet or devices, was a perceived barrier to using CPGs. These views mirrored those of PHC  
15 providers in the same districts that we spoke to who described that they would be more likely to use  
16 CPGs if digital access was possible (37). However, like the managers, they perceived lack of internet in  
17 facilities, and exorbitant costs of data required for downloading CPGs, as barriers to digital access (37).  
18  
19  
20  
21  
22  
23  
24  
25  
26  
27  
28  
29  
30  
31

32 Human resource constraints, such as clinical workload and understaffing, was another health system  
33 issue hindering CPG implementation, a finding that echoes a sub-study of PHC clinical staff in these  
34 districts (37).  
35  
36  
37  
38  
39  
40

41 Training is the mainstay of capacity building for human resources for health. Training is vital for building  
42 skills and knowledge to implement CPGs, but is also a form of enablement for teams more generally. In  
43 South Africa, like many low- or middle-income settings, nurses are the backbone of PHC services. Yet,  
44 poor quality nurse training was a concerning issue, associated with outdated curricula, inaccessible  
45 training sites and presumed impact on patient care. Similar findings have been reported from other  
46 research in South Africa, for example in the context of antenatal care guideline adherence (68). But this  
47 gap and challenge is a global challenge, with the World Health Organization recognising the importance  
48  
49  
50  
51  
52  
53  
54  
55  
56  
57  
58  
59  
60

1  
2  
3 of quality health workforce training in realizing UHC (69). One of the contradictions from our findings  
4 was that despite training gaps and primary care provider workload, one of the doctors raised that  
5  
6  
7 ‘nurses know more than doctors’. This was in reference to their view that nurses apparently have more  
8  
9 opportunity for training and are also more motivated to use current CPGs than doctors. Our previous  
10  
11 research with primary care providers reflects this finding of a potential willingness to use guidelines in  
12  
13 nurses, rather than by doctors, but further research is needed to explore this issue (37).  
14  
15  
16  
17  
18

19 To overcome these challenges, many participants pointed to the importance of post-training clinical  
20  
21 mentorship. When in place, this clinical mentorship was perceived to provide the necessary, case-  
22  
23 based, in-facility support for CPG implementation and role-modelling CPG use. This view has been  
24  
25 reported by other South African studies, in particular a study exploring the Ideal Clinic programme  
26  
27 implementation suggested that family doctors in the DCSTs have similar perspectives regarding the  
28  
29 importance of mentorship (70, 71).  
30  
31  
32  
33  
34

35 In addition to health systems issues, the importance of context emerged as a significant theme. Within  
36  
37 the public sector, CPG production in South Africa is generally the responsibility of the National  
38  
39 Department of Health and implementation a provincial mandate, with further devolvement of decision-  
40  
41 making to districts (9). This decentralised approach is advocated globally, particularly for health systems  
42  
43 progressing to UHC to enable more responsive, ground-up health services (72). However, from our  
44  
45 participants we learned that the problem with this is two-fold. Firstly, health indicators are aligned with  
46  
47 national strategies, which do not consider differences between provinces. Secondly, local teams lack  
48  
49 time and specific training in the adaptation of the CPGs for their setting. These concerns were also  
50  
51 expressed by national primary care CPG developers, who described that fragmentation between and  
52  
53 within provinces likely hampers implementation (43). According to our participants, implementation of a  
54  
55  
56  
57  
58  
59  
60

1  
2  
3 'one size fits all' national CPG may result in several negative consequences, including poor scores on  
4 national indicators due to unfeasible recommendations that are not adequately implemented ('round  
5 peg in a square hole' analogy); and rushed implementation to align with a national programme or  
6 political drive.  
7  
8  
9  
10

11  
12  
13  
14 Despite, and perhaps because of, the contextual challenges these managers encountered, many of them  
15 described innovative approaches to overcome geographic barriers or cultural issues. For example, a  
16 female manager in the Eastern Cape led the development of a male nurse-led programme for medical  
17 male circumcision because in her setting for women to discuss circumcision is a cultural taboo. In  
18 addition, where geographical barriers arose, such as flooding rivers, district managers tried to provide  
19 vehicles and airtime to community healthcare workers to reach patients. This was not always successful,  
20 due to financial barriers and inadequate procurement processes. A number of managers described plans  
21 that required impressive ingenuity and commitment to overcome health system and contextual barriers,  
22 despite all odds, and seemingly with little recognition. Additionally, despite the managers' evident  
23 wealth of knowledge, experience and creative solutions, when pressed, there was a notable absence of  
24 examples provided by participants of opportunities to share lessons learned, innovative approaches, and  
25 successes or challenges between and within districts or provinces.  
26  
27  
28  
29  
30  
31  
32  
33  
34  
35  
36  
37  
38  
39  
40  
41  
42

43 Taken together these health system and contextual barriers to CPG implementation are recognized in  
44 various CPG frameworks as potential challenges to implementation (31, 73). However, arguably, those  
45 frameworks, largely developed in higher-income settings, contain more detail regarding the CPG and  
46 healthcare provider characteristics and less regarding the social, political and contextual factors. In  
47 South Africa, availability of CPGs and motivation of healthcare providers and managers to support CPG  
48 use are less of an issue than those of context and health systems (37).  
49  
50  
51  
52  
53  
54  
55  
56  
57  
58  
59  
60

### Implications for policy and practice

Although substantial research about district health services and systems exists in South Africa and elsewhere, there is a paucity of evidence published through the lens of CPG implementation. CPGs are amongst the tools used for policy implementation. In this study, participants made recommendations regarding structural barriers that hinder CPG implementation and ultimately impact patient care. Participants emphasised the importance of strengthening leadership, clarifying roles and putting in place constructive accountability measures. Skilled nursing and other clinical services are required to address the health burden, along with the equipment and supplies to deliver their services as recommended by evidence-informed CPGs. Quality assurance of PHC training programmes, particularly nurses, and facilitating interdisciplinary training to ensure all staff are adhering to CPGs was suggested. Innovations, such as the DCSTs, are filling a reported gap in providing clinical mentorship, but these collaborative working groups need further strengthening. Finally, for effective CPG implementation in health services to occur, considerations of the unique settings in each province, including culture, geography and social needs, must be undertaken. Systematic use of available CPG implementation checklists to explore, understand and plan for implementation will assist to tailor strategies to address local needs, making best use of limited resources (31, 34, 73).

### Limitations

Elsewhere we have discussed limitations within the broader SAGE qualitative study (37, 44). In brief, exploring CPG implementation for all PHC CPGs encompasses a very broad research area. Many PHC CPGs are available, each likely has different barriers. However, in our exploratory research, we found many cross-cutting issues likely to affect most PHC CPGs, such as access, training and supply chain factors. Future research can build on our findings and identify CPG-specific barriers and enablers. In

1  
2  
3 particular, the thematic area on socio-cultural-geographic issues, although of equal important and  
4  
5 impact on CPG implementation, included relatively fewer findings. The latter requires further  
6  
7 exploration with additional participants from various groups including patients and community leaders.  
8  
9 This will provide further specific contextual insights into important barriers to CPG uptake.  
10  
11  
12  
13

14 Regarding this sub-study, a potential limitation is the sample, including provincial and district managers  
15  
16 in four provinces, which may not sufficiently capture all views for this sub-group of the health services.  
17  
18 Additionally, we used a mix of purposive and convenience sampling, resulting in inclusion of participants  
19  
20 who were more likely to be available or responsive. Despite this, common themes emerged and were  
21  
22 experienced across provinces and reflect previous research. As this is not a static situation, research in  
23  
24 the evolving process to UHC is likely necessary. Moreover, while many of the same themes reemerged  
25  
26 amongst participants, complete data saturation was not reached in this sub-study. Time and financial  
27  
28 restraints prevented further data collection; additional concepts may have emerged if we had spoken to  
29  
30 further people. Further research amongst this population would thus be potentially useful.  
31  
32  
33  
34  
35  
36

37 Finally, we cannot rule out the possibility of response bias, in which participants respond according to  
38  
39 what they believe we want to hear (55). However, from most participants, many rich issues arose. Using  
40  
41 the individual interview approach may have provided a safe space and achieved the depth that we have  
42  
43 been able to capture and share in this paper.  
44  
45  
46  
47

## 48 **Conclusion**

49  
50 CPGs are amongst the suggested policy tools to achieve evidence-informed, effective and cost-effective  
51  
52 universal healthcare (15). Sub-national health managers reported that health system challenges, along  
53  
54 with socio-cultural and geographic context, are central issues hampering successful CPG  
55  
56  
57  
58  
59

1  
2  
3 implementation. Our study adds to a body of knowledge regarding evidence-informed policy  
4  
5 implementation. Our participants provide practical insights relevant to primary care CPG  
6  
7 implementation for lower-resourced settings aiming for UHC.  
8  
9  
10  
11

## 12 **List of abbreviations**

|    |      |                                   |
|----|------|-----------------------------------|
| 14 | CPG  | Clinical practice guideline       |
| 15 |      |                                   |
| 16 | DCST | District Clinical Specialist Team |
| 17 |      |                                   |
| 18 | EC   | Eastern Cape                      |
| 19 |      |                                   |
| 20 | HIV  | Human immunodeficiency virus      |
| 21 |      |                                   |
| 22 | KZN  | Kwa-Zulu Natal                    |
| 23 |      |                                   |
| 24 | LPP  | Limpopo                           |
| 25 |      |                                   |
| 26 | PHC  | Primary health care               |
| 27 |      |                                   |
| 28 | UHC  | Universal health coverage         |
| 29 |      |                                   |
| 30 | WC   | Western Cape                      |
| 31 |      |                                   |
| 32 |      |                                   |
| 33 |      |                                   |
| 34 |      |                                   |
| 35 |      |                                   |
| 36 |      |                                   |

## 37 **Declarations**

### 38 *Ethics approval and consent to participate*

39  
40  
41 The study was approved by the Research Ethics Committees of the South African Medical Research  
42  
43 Council (EC002-2/2014) and Stellenbosch University (N14/02/008). The informed-consent form was sent  
44  
45 to the individuals prior to the interviews and was also explained and confirmed at the start of  
46  
47 interviews. All participants provided individual written informed consent. The names of participants  
48  
49 have been captured and have restricted access. We referred to the Consolidated criteria for reporting  
50  
51 qualitative research (COREQ) to ensure comprehensive reporting (36).  
52  
53  
54  
55  
56  
57  
58  
59  
60

1  
2  
3 *Consent for publication*  
4

5 Not applicable  
6  
7  
8  
9

10 *Availability of data and material*  
11

12 The datasets generated and/or analysed during the current study are not publicly available as this may  
13 be linked to specific health managers that were interviewed and as such is not available open use data.  
14  
15 Should anyone wish to have access or is interested in further exploration of the data, you may contact  
16  
17 the author: [tamara.kredo@mrc.ac.za](mailto:tamara.kredo@mrc.ac.za).  
18  
19  
20  
21  
22

23 *Competing interests*  
24

25 TK has contributed evidence to the National Department of Health Essential Drugs List Adult level  
26  
27 standard treatment guideline (non-funded); and facilitated workshops and capacity development for  
28  
29 under and post-graduate students, researchers, policymakers and practitioners on clinical practice  
30  
31 guidelines and evidence-informed practices. JV has been involved in guideline development globally and  
32  
33 regionally, he has been on advisory committees for clinical guidelines in the Western Province and has  
34  
35 facilitated workshops and capacity development for under and postgraduate students, researchers and  
36  
37 practitioners on clinical practice guidelines and evidence-informed practices. SC, SA, AA, BS and JM have  
38  
39 no competing interests to declare.  
40  
41  
42

43 No financial competing interests to declare for any contributors to this research.  
44  
45  
46  
47

48 *Funding*  
49

50 This research is supported through a grant from the Flagships Awards Project by the South African  
51  
52 Medical Research Council (SAMRC-RFA-IFSP-01-2013/ SAGE).  
53  
54  
55  
56  
57  
58

### *Authors' contributions*

TK drafted the protocol, with input from JV, and AA, amongst others involved with the initial SAGE project. TK, AA and JM were involved with data collection. TK, SA, JV, AA, JM, SC and BM contributed to discussions regarding analysis of findings. TK drafted the manuscript, with input from all authors. All authors approved the final version of the manuscript.

### *Acknowledgements*

We would like to thank all those who participated in the research, giving us time from their management duties and helping us to understand the clinical guideline implementation landscape in South Africa. Many thanks also to several Cochrane South Africa staff and researchers who assisted with the project including Tebogo Mokganyetji, Karen Daniels, Michelle Galloway, and Joy Oliver.

### **References**

1. World Health Organization. Declaration of Alma-Ata. Geneva: World Health Organization; 1978. Available from: [http://www.euro.who.int/\\_data/assets/pdf\\_file/0009/113877/E93944.pdf?ua=1](http://www.euro.who.int/_data/assets/pdf_file/0009/113877/E93944.pdf?ua=1).
2. World Health Organization. The World Health Report 2008: Primary Health Care: (Now More than Ever) Geneva:: World Health Organization; 2008 [Available from: <https://www.who.int/whr/2008/en/>].
3. World Health Organization and the United Nations Children's Fund (UNICEF), editor Declaration of Astana. Global Conference on Primary Health Care; 2018; Astana, Kazakhstan 2018.
4. World Health Organization and International Bank for Reconstruction and Development / The World Bank. Tracking Universal Health Coverage: 2017 Global Monitoring Report. Switzerland; 2017.
5. Department of Health SA. Strategic Plan: Department of Health 2014/2015 - 2018/2019. In: Department of Health, editor. Pretoria: Government; 2014.
6. Department of Health SA. The 10 Point Plan Medium Term Strategic Framework. In: Department of Health, editor. 2009.
7. Kautzky K, Tollman SM. A perspective on Primary Health Care in South Africa : Primary Health Care : in context. South African Health Review. 2008;2008(1):17-30.
8. Pillay-van Wyk V, Msemburi W, Laubscher R, Dorrington RE, Groenewald P, Glass T, et al. Mortality trends and differentials in South Africa from 1997 to 2012: second National Burden of Disease Study. The Lancet Global health. 2016;4(9):e642-53.
9. Mayosi BM, Lawn JE, van Niekerk A, Bradshaw D, Abdool Karim SS, Coovadia HM. Health in South Africa: changes and challenges since 2009. Lancet. 2012;380(9858):2029-43.



10. Minister of Health. National Health Insurance Bill Pretoria, South Africa 2018 [Available from: [https://www.gov.za/sites/default/files/gcis\\_document/201806/41725gon635s.pdf](https://www.gov.za/sites/default/files/gcis_document/201806/41725gon635s.pdf)].
11. Rispel L. Analysing the progress and fault lines of health sector transformation in South Africa. 2016. In: South African Health Review 2016+ [Internet]. Durban: Health Systems Trust. Available from: <http://www.hst.org.za/publications/south-african-health-review-2016>.
12. Lorenzoni L, Roubal T. International Comparison of South African Private Hospital Price Levels. 2016.
13. National Treasury. Inter-governmental Fiscal reviews - Provincial Budgets and Expenditure Review: 2010/11 - 2016/17. Pretoria: National Treasury of the Republic of South Africa; 2015.
14. Naledi T BP, Schneider H. Primary Health Care in SA since 1994 and Implications of the New Vision for PHC reengineering. In: Padarath A ER, editor. South African Health Review 2011. Durban: Health Systems Trust; 2011.
15. Department of Health SA. National Health Insurance for South Africa - towards universal health coverage (White Paper). In: Department of Health, editor. Pretoria: Government; 2015.
16. World Health Organization. WHO Handbook for guideline development 2008 January 2011; (August 2010). Available from: [http://www.searo.who.int/LinkFiles/RPC\\_Handbook\\_Guideline\\_Development.pdf](http://www.searo.who.int/LinkFiles/RPC_Handbook_Guideline_Development.pdf).
17. Institute of Medicine. Clinical Practice Guidelines We Can Trust. Graham R, Mancher M, Wolman DM, Greenfield S, Steinberg E, editors. Washington, DC: The National Academies Press; 2011. 290 p.
18. Kredo T, Bernhardsson S, Machingaidze S, Young T, Louw Q, Ochodo E, et al. Guide to clinical practice guidelines: the current state of play. *Int J Qual Health Care*. 2016;28(1):122-8.
19. Wilkinson M, Wilkinson T, Kredo T, MacQuilkan K, Mudara C, Winch A, et al. South African clinical practice guidelines: A landscape analysis. *S Afr Med J*. 2017;108(1):23-7.
20. Cullum N, Sheldon T, Watt I, West P, Wright J. Assessment of NICE guidance. *Lancet*. 2004;364(9429):136; author reply 7.
21. Spyridonidis D, Calnan M. Opening the black box: A study of the process of NICE guidelines implementation. *Health Policy*. 2011;102(2-3):117-25.
22. Runciman WB, Hunt TD, Hannaford NA, Hibbert PD, Westbrook JI, Coiera EW, et al. CareTrack: assessing the appropriateness of health care delivery in Australia. *Med J Aust*. 2012;197(2):100-5.
23. Seddon ME, Marshall MN, Campbell SM, Roland MO. Systematic review of studies of quality of clinical care in general practice in the UK, Australia and New Zealand. *Qual Health Care*. 2001;10(3):152-8.
24. Ncube NB, Solanki GC, Kredo T, Lalloo R. Antibiotic prescription patterns of South African general medical practitioners for treatment of acute bronchitis. *S Afr Med J*. 2017;107(2):119-22.
25. Mash B, Rhode H, Pather M, Ainslie G, Irusen E, Bheekie A, et al. Quality of asthma care: Western Cape province, South Africa. *S Afr Med J*. 2009;99(12):892-6.
26. Grol R. Implementing guidelines in general practice care. *Qual Health Care*. 1992;1(3):184-91.
27. Grol R, Wensing M. What drives change? Barriers to and incentives for achieving evidence-based practice. *Med J Aust*. 2004;180(6 Suppl):S57-60.
28. Grol R, Wensing M, Eccles M, Davis D. Improving Patient Care: The Implementation of Change in Health Care. Second Edition ed. United Kingdom: John Wiley & Sons, Ltd; 2013.
29. Grimshaw J, Thomas R, MacLennan G, Fraser C, Ramsay C. Effectiveness and efficiency of guideline dissemination and implementation strategies. *Health Technology Assessment*. 2004;8(6):84.
30. Schünemann HJ, Wiercioch W, Etzeandía I, Falavigna M, Santesso N, Mustafa R, et al. Guidelines 2.0: systematic development of a comprehensive checklist for a successful guideline enterprise. *Canadian Medical Association Journal*. 2014;186(3):E123-E42.

- 1  
2  
3 31. Gagliardi AR, Marshall C, Huckson S, James R, Moore V. Developing a checklist for guideline  
4 implementation planning: review and synthesis of guideline development and implementation advice.  
5 *Implementation Science*. 2015;10(1):19.  
6  
7 32. Gagliardi AR, Brouwers MC, Palda VA, Lemieux-Charles L, Grimshaw JM. How can we improve  
8 guideline use? A conceptual framework of implementability. *Implement Sci*. 2011;6:26.  
9  
10 33. Pantoja T, Opiyo N, Lewin S, Paulsen E, Ciapponi A, Wiysonge CS, et al. Implementation  
11 strategies for health systems in low-income countries: an overview of systematic reviews. *Cochrane*  
12 *Database Syst Rev*. 2017;9:CD011086.  
13  
14 34. Baker R, Camosso-Stefinovic J, Gillies C, Shaw EJ, Cheater F, Flottorp S, et al. Tailored  
15 interventions to address determinants of practice. *Cochrane Database of Systematic Reviews*. 2015(4).  
16  
17 35. Michie S, van Stralen MM, West R. The behaviour change wheel: a new method for  
18 characterising and designing behaviour change interventions. *Implement Sci*. 2011;6:42.  
19  
20 36. French SD, McKenzie JE, O'Connor DA, Grimshaw JM, Mortimer D, Francis JJ, et al. Evaluation of  
21 a theory-informed implementation intervention for the management of acute low back pain in general  
22 medical practice: the IMPLEMENT cluster randomised trial. *PLoS One*. 2013;8(6):e65471.  
23  
24 37. Kredo T, Cooper S, Abrams A, Muller J, Volmink J, Atkins S. Using the behavior change wheel to  
25 identify barriers to and potential solutions for primary care clinical guideline use in four provinces in  
26 South Africa. *BMC Health Services Research*. 2018;18(1):965.  
27  
28 38. Nilsen P. Making sense of implementation theories, models and frameworks. *Implement Sci*.  
29 2015;10:53.  
30  
31 39. Fairall L, Cornick R, Bateman E. Empowering frontline providers to deliver universal primary  
32 healthcare using the Practical and Approach to care kit. *BMJ Global Health*. 2018;3(Suppl 5):bmjgh-2018-  
33 k4451rep.  
34  
35 40. Chinnock P, Siegfried N, Clarke M. Is evidence-based medicine relevant to the developing world?  
36 *PLoS Med*. 2005;2(5):e107.  
37  
38 41. Young T, Garner P, Clarke M, Volmink J. Evidence-based health care and policy in Africa: past,  
39 present, and future. *J Clin Epidemiol*. 2016.  
40  
41 42. Kredo T, Machingaidze S, Louw Q, Young T, Grimmer K. South African Guideline Excellence  
42 (SAGE): What's in a name? *S Afr Med J*. 2016;106(1):18-20.  
43  
44 43. Kredo T, Abrams A, Young T, Louw Q, Volmink J, Daniels K. Primary care clinical practice  
45 guidelines in South Africa: qualitative study exploring perspectives of national stakeholders. *BMC Health*  
46 *Serv Res*. 2017;17(1):608.  
47  
48 44. Kredo T, Cooper S, Abrams A, Daniels K, Volmink J, Atkins S. National stakeholders' perceptions  
49 of the processes that inform the development of national clinical practice guidelines for primary  
50 healthcare in South Africa. *Health Res Policy Syst*. 2018;16(1):68.  
51  
52 45. Dizon JM, Grimmer K, Louw Q, Machingaidze S, Parker H, Pillen H. Barriers and enablers for the  
53 development and implementation of allied health clinical practice guidelines in South African primary  
54 healthcare settings: a qualitative study. *Health Research Policy and Systems*. 2017;15(1):79.  
55  
56 46. Dizon JM, Grimmer K, Machingaidze S, McLaren P, Louw Q. Mapping South African allied health  
57 primary care clinical guideline activity: establishing a stakeholder reference sample. *Health Res Policy*  
58 *Syst*. 2016;14(1):77.  
59  
60 47. Dizon JM, Grimmer KA, Machingaidze S, Louw QA, Parker H. South African primary health care  
allied health clinical practice guidelines: the big picture. *BMC Health Serv Res*. 2018;18(1):48.  
48. Louw Q, Dizon JM, Grimmer K, McCaul M, Kredo T, Young T. Building capacity for development  
and implementation of clinical practice guidelines. *S Afr Med J*. 2017;107(9):745-6.  
49. Statistics South Africa. Mid-year population estimates Pretoria, South Africa,  
<http://www.statssa.gov.za/>; 2019 2019. Contract No.: P0302.

- 1  
2  
3 50. The World Bank. South Africa - overview  
4 <https://www.worldbank.org/en/country/southafrica/overview2019> [  
5  
6 51. Day C, Gray, A. . Health and related indicators. In: Padarath. A B, P., editor. South African Health  
7 Review Durban, South Africa: Health Systems Trust; 2017. p. 217-340.  
8 52. Department of Health SA. White Paper for the Transformation of the Health System in South  
9 Africa #17910. In: Department of Health, editor. Pretoria1997.  
10 53. Matsoso MP, Fryatt R. National Health Insurance: the first 16 months. S Afr Med J.  
11 2013;103(3):156-8.  
12 54. Department of Health. Ideal Clinic South Africa [Available from: <https://www.idealclinic.org.za>.  
13 55. Green J. Thorogood N. Qualitative Methods for Health Research. Third ed. Silverman D, editor.  
14 London: SAGE; 2004.  
15 56. Graneheim UH, Lundman B. Qualitative content analysis in nursing research: concepts,  
16 procedures and measures to achieve trustworthiness. Nurse Education Today. 2003;24(2):105-12.  
17 57. Saldana J. The coding manual for qualitative researchers. Los Angeles, CA: SAGE; 2009  
18 58. Malterud K. Qualitative research: standards, challenges, and guidelines. The  
19 Lancet.358(9280):483-8.  
20 59. Health systems evidence: Taxonomy of governance, financial and delivery arrangements and  
21 implementation strategies within health systems [Internet]. McMaster Health Forum. 2017 [cited 17  
22 February 2019]. Available from: [https://www.mcmasterforum.org/docs/default-](https://www.mcmasterforum.org/docs/default-source/resources/hse_taxonomy.pdf?sfvrsn=4)  
23 [source/resources/hse\\_taxonomy.pdf?sfvrsn=4](https://www.mcmasterforum.org/docs/default-source/resources/hse_taxonomy.pdf?sfvrsn=4).  
24 60. World Health Organization. Monitoring the building blocks of health systems: a handbook of  
25 indicators and their measurement strategies. Geneva, Switzerland: World Health Organization; 2010.  
26 Available from: <https://www.who.int/healthinfo/systems/monitoring/en/>.  
27 61. Herrera CA, Lewin S, Paulsen E, Ciapponi A, Opiyo N, Pantoja T, et al. Governance arrangements  
28 for health systems in low-income countries: an overview of systematic reviews. Cochrane Database Syst  
29 Rev. 2017;9:CD011085.  
30 62. Ngidi WH, Naidoo JR, Ncama BP, Luvuno ZPB, Mashamba-Thompson TP. Mapping evidence of  
31 interventions and strategies to bridge the gap in the implementation of the prevention of mother-to-  
32 child transmission of HIV programme policy in sub-Saharan countries: A scoping review. 2017. 2017;9(1).  
33 63. Ivers N, Jamtvedt G, Flottorp S, Young JM, Odgaard-Jensen J, French SD, et al. Audit and  
34 feedback: effects on professional practice and healthcare outcomes. Cochrane Database Syst Rev.  
35 2012(6):CD000259.  
36 64. Donabedian A. The Quality of Care: How Can It Be Assessed? JAMA. 1988;260(12):1743-8.  
37 65. M Campbell S, Roland M, Buetow S. Defining Quality of Care2001. 1611-25 p.  
38 66. Leslie HH, Sun Z, Kruk ME. Association between infrastructure and observed quality of care in 4  
39 healthcare services: A cross-sectional study of 4,300 facilities in 8 countries. PLOS Medicine.  
40 2017;14(12):e1002464.  
41 67. Dixon-Woods M, Baker R, Charles K, Dawson J, Jerzembek G, Martin G, et al. Culture and  
42 behaviour in the English National Health Service: overview of lessons from a large multimethod study.  
43 BMJ quality & safety. 2014;23(2):106-15.  
44 68. Patience NTS, Sibiyi NM, Gwele NS. Evidence of application of the Basic Antenatal Care  
45 principles of good care and guidelines in pregnant women's antenatal care records. 2016. 2016;8(2).  
46 69. World Health Organization. Global strategy on human resources for health: workforce 2030.  
47 Geneva, Switzerland 2016. Report No.: ISBN 978 92 4 151113 1  
48 70. Nkosi ZZ, Asah F, Pillay P. Post-basic nursing students' access to and attitudes toward the use of  
49 information technology in practice: a descriptive analysis. Journal of nursing management.  
50 2011;19(7):876-82.  
51  
52  
53  
54  
55  
56  
57  
58  
59  
60

- 1  
2  
3 71. Department of Health SA. Ideal Clinic- Components and Definition. In: Department of Health,  
4 editor. Pretoria: Government; 2014.  
5 72. Cobos Munoz D, Merino Amador P, Monzon Llamas L, Martinez Hernandez D, Santos Sancho JM.  
6 Decentralization of health systems in low and middle income countries: a systematic review. Int J Public  
7 Health. 2017;62(2):219-29.  
8 73. Flottorp SA, Oxman AD, Krause J, Musila NR, Wensing M, Godycki-Cwirko M, et al. A checklist for  
9 identifying determinants of practice: a systematic review and synthesis of frameworks and taxonomies  
10 of factors that prevent or enable improvements in healthcare professional practice. Implement Sci.  
11 2013;8:35.  
12  
13  
14  
15  
16  
17  
18  
19  
20  
21  
22  
23  
24  
25  
26  
27  
28  
29  
30  
31  
32  
33  
34  
35  
36  
37  
38  
39  
40  
41  
42  
43  
44  
45  
46  
47  
48  
49  
50  
51  
52  
53  
54  
55  
56  
57  
58  
59  
60

For peer review only

## Guideline implementation

### Supplementary file 1. Interview schedule for semi-structured interviews

|                                                                                                                            |                                                                                                                                          |
|----------------------------------------------------------------------------------------------------------------------------|------------------------------------------------------------------------------------------------------------------------------------------|
| 1<br>2<br>3<br>4<br>5<br>6<br>7<br>8<br>9<br>10<br>11<br>12<br>13                                                          | BACKGROUND QUESTION: what is your experience and understanding of what a guideline is or does?                                           |
| 14<br>15<br>16<br>17                                                                                                       | 1. What is your context (role, position) as it links to clinical practice guidelines?                                                    |
| 18<br>19<br>20<br>21<br>22<br>23                                                                                           | 2. What processes of primary care clinical practice guideline development, contextualisation, adapting, and implementation are in place? |
| 24<br>25<br>26<br>27                                                                                                       | 3. Who is involved/ role players?                                                                                                        |
| 28<br>29<br>30<br>31<br>32<br>33                                                                                           | 4. What works for clinical guideline development? What could be better? (if relevant to the informant)                                   |
| 34<br>35<br>36<br>37<br>38<br>39                                                                                           | 5. What works for clinical guideline implementation? What could be better? (if relevant to the informant)                                |
| 40<br>41<br>42<br>43<br>44<br>45<br>46<br>47<br>48<br>49<br>50<br>51<br>52<br>53<br>54<br>55<br>56<br>57<br>58<br>59<br>60 | 6. If we want to know more, who should we speak to?                                                                                      |

Consolidated criteria for reporting qualitative research (COREQ): a 32-item checklist for interviews and focus groups

SAGE provincial managers paper

31 October 2019

| No / Item                                      | Guide questions/description                                                                              | Section in paper                                                                                                                                                                                                                          |
|------------------------------------------------|----------------------------------------------------------------------------------------------------------|-------------------------------------------------------------------------------------------------------------------------------------------------------------------------------------------------------------------------------------------|
| <b>Domain 1: Research team and reflexivity</b> |                                                                                                          |                                                                                                                                                                                                                                           |
| <b>Personal Characteristics</b>                |                                                                                                          |                                                                                                                                                                                                                                           |
| 1. Interviewer/facilitator                     | Which author/s conducted the interview or focus group?                                                   | Details provided in methods and in previous publications. See section on 'data collection and management'                                                                                                                                 |
| 2. Credentials                                 | What were the researcher's credentials? E.g. PhD, MD                                                     | Provided in methods – not provided in detail, but provided in 'data collection and management' section of methods                                                                                                                         |
| 3. Occupation                                  | What was their occupation at the time of the study?                                                      | Outlined in methods.                                                                                                                                                                                                                      |
| 4. Gender                                      | Was the researcher male or female?                                                                       | Not mentioned in the manuscript. Interview teams were all female, and the research team included both sexes. However, given the interviews were with senior managers, the sex of the interview team was not deemed of central importance. |
| 5. Experience and training                     | What experience or training did the researcher have?                                                     | Outlined in methods – training was provided for interviewing, along with mentoring of the lead interviewer TK. Further, post interview reflection enabled learning and enhanced practice.                                                 |
| <b>Relationship with participants</b>          |                                                                                                          |                                                                                                                                                                                                                                           |
| 6. Relationship established                    | Was a relationship established prior to study commencement?                                              | In the methods section we refer to the sampling approach which was purposive, not prior relationships existed.                                                                                                                            |
| 7. Participant knowledge of the interviewer    | What did the participants know about the researcher? e.g. personal goals, reasons for doing the research | See point 6 above - no prior relationship.                                                                                                                                                                                                |
| 8. Interviewer characteristics                 | What characteristics were reported about the                                                             | The details regarding the interviewers/ researches is                                                                                                                                                                                     |

|                                          |                                                                                                                                                          |                                                                                                                                                                                                                     |
|------------------------------------------|----------------------------------------------------------------------------------------------------------------------------------------------------------|---------------------------------------------------------------------------------------------------------------------------------------------------------------------------------------------------------------------|
|                                          | interviewer/facilitator? e.g. Bias, assumptions, reasons and interests in the research topic                                                             | reported in the section on 'data collection and management'. This includes reference to their training and the interdisciplinary mix of researchers.                                                                |
| <b>Domain 2: study design</b>            |                                                                                                                                                          |                                                                                                                                                                                                                     |
| <b>Theoretical framework</b>             |                                                                                                                                                          |                                                                                                                                                                                                                     |
| 9. Methodological orientation and Theory | What methodological orientation was stated to underpin the study? e.g. grounded theory, discourse analysis, ethnography, phenomenology, content analysis | This appears in the methods section along with detailed reporting of the process.                                                                                                                                   |
| <b>Participant selection</b>             |                                                                                                                                                          |                                                                                                                                                                                                                     |
| 10. Sampling                             | How were participants selected? e.g. purposive, convenience, consecutive, snowball                                                                       | Within the methods section, we outline that both purposive sampling (for the participants role in guideline implementation) and convenience sampling (where specific people were suggested and available) was used. |
| 11. Method of approach                   | How were participants approached? e.g. face-to-face, telephone, mail, email                                                                              | Included in methods section. We describe the face to face semi-structured interviews.                                                                                                                               |
| 12. Sample size                          | How many participants were in the study?                                                                                                                 | Reported in results section in narrative and table.                                                                                                                                                                 |
| 13. Non-participation                    | How many people refused to participate or dropped out? Reasons?                                                                                          | Included in methods – there was no non-participation. All agreed to participate, none dropped out or refused.                                                                                                       |
| <b>Setting</b>                           |                                                                                                                                                          |                                                                                                                                                                                                                     |
| 14. Setting of data collection           | Where was the data collected? e.g. home, clinic, workplace                                                                                               | Provided in methods and previous publications – all interviews took place in work place, except one telephone call that was chosen for convenience for the participant.                                             |
| 15. Presence of non-participants         | Was anyone else present besides the participants and researchers?                                                                                        | Not included, as there were no non-participants, all were interviewed following informed consent.                                                                                                                   |
| 16. Description of sample                | What are the important characteristics of the sample? e.g. demographic data, date                                                                        | Relevant details provided in methods – however, only basics regarding their role,                                                                                                                                   |



|                                        |                                                                                                                                   |                                                                                                                                                                           |
|----------------------------------------|-----------------------------------------------------------------------------------------------------------------------------------|---------------------------------------------------------------------------------------------------------------------------------------------------------------------------|
|                                        |                                                                                                                                   | professional background and sex were gathered                                                                                                                             |
| <b>Data collection</b>                 |                                                                                                                                   |                                                                                                                                                                           |
| 17. Interview guide                    | Were questions, prompts, guides provided by the authors? Was it pilot tested?                                                     | Approach outlined in methods and guide provided in appendix. The semi-structured guide informed the interviews, was also adapted iteratively as the interviews proceeded. |
| 18. Repeat interviews                  | Were repeat interviews carried out? If yes, how many?                                                                             | n/a                                                                                                                                                                       |
| 19. Audio/visual recording             | Did the research use audio or visual recording to collect the data?                                                               | We used digital recordings which is described in methods section.                                                                                                         |
| 20. Field notes                        | Were field notes made during and/or after the interview or focus group?                                                           | Reported in methods - We captured some field notes, and also post-interview reflections on the data and process of the interviews.                                        |
| 21. Duration                           | What was the duration of the interviews or focus group?                                                                           | Described in methods – approximately 60 – 90 minutes                                                                                                                      |
| 22. Data saturation                    | Was data saturation discussed?                                                                                                    | This is mentioned in the discussion, under study limitations.                                                                                                             |
| 23. Transcripts returned               | Were transcripts returned to participants for comment and/or correction?                                                          | Not done                                                                                                                                                                  |
| <b>Domain 3: analysis and findings</b> |                                                                                                                                   |                                                                                                                                                                           |
| <b>Data analysis</b>                   |                                                                                                                                   |                                                                                                                                                                           |
| 24. Number of data coders              | How many data coders coded the data?                                                                                              | Details of analysis in methods – the lead researcher did the coding.                                                                                                      |
| 25. Description of the coding tree     | Did authors provide a description of the coding tree?                                                                             | Not provided here                                                                                                                                                         |
| 26. Derivation of themes               | Were themes identified in advance or derived from the data?                                                                       | Described in methods, the codes were derived from data inductively.                                                                                                       |
| 27. Software                           | What software, if applicable, was used to manage the data?                                                                        | Not used                                                                                                                                                                  |
| 28. Participant checking               | Did participants provide feedback on the findings?                                                                                | Not done                                                                                                                                                                  |
| <b>Reporting</b>                       |                                                                                                                                   |                                                                                                                                                                           |
| 29. Quotations presented               | Were participant quotations presented to illustrate the themes / findings? Was each quotation identified? e.g. participant number | Several quotations are included with an identifier to illustrate the data.                                                                                                |



|                                  |                                                                        |                                                                          |
|----------------------------------|------------------------------------------------------------------------|--------------------------------------------------------------------------|
| 30. Data and findings consistent | Was there consistency between the data presented and the findings?     | Aligned throughout the manuscript to ensure the results reflect the data |
| 31. Clarity of major themes      | Were major themes clearly presented in the findings?                   | In results - outlined major themes and categories                        |
| 32. Clarity of minor themes      | Is there a description of diverse cases or discussion of minor themes? | Results section - differing views are included.                          |

For peer review only

# BMJ Open

## 'Building on shaky ground' – challenges to and solutions for primary care guideline implementation in four provinces in South Africa: a qualitative study

|                                 |                                                                                                                                                                                                                                                                                                                                                                                                                                                                                                                                                                                                                                                                                                                                                                                                                                                                                                                                                                                                                  |
|---------------------------------|------------------------------------------------------------------------------------------------------------------------------------------------------------------------------------------------------------------------------------------------------------------------------------------------------------------------------------------------------------------------------------------------------------------------------------------------------------------------------------------------------------------------------------------------------------------------------------------------------------------------------------------------------------------------------------------------------------------------------------------------------------------------------------------------------------------------------------------------------------------------------------------------------------------------------------------------------------------------------------------------------------------|
| Journal:                        | <i>BMJ Open</i>                                                                                                                                                                                                                                                                                                                                                                                                                                                                                                                                                                                                                                                                                                                                                                                                                                                                                                                                                                                                  |
| Manuscript ID                   | bmjopen-2019-031468.R2                                                                                                                                                                                                                                                                                                                                                                                                                                                                                                                                                                                                                                                                                                                                                                                                                                                                                                                                                                                           |
| Article Type:                   | Research                                                                                                                                                                                                                                                                                                                                                                                                                                                                                                                                                                                                                                                                                                                                                                                                                                                                                                                                                                                                         |
| Date Submitted by the Author:   | 28-Feb-2020                                                                                                                                                                                                                                                                                                                                                                                                                                                                                                                                                                                                                                                                                                                                                                                                                                                                                                                                                                                                      |
| Complete List of Authors:       | Kredo, Tamara; South African Medical Research Council, Cochrane South Africa; Stellenbosch University Faculty of Medicine and Health Sciences, Department of Medicine, Division of Clinical Pharmacology<br>Cooper, Sara ; South African Medical Research Council, Cochrane South Africa; University of Cape Town Faculty of Health Sciences, School of Public Health and Family Medicine<br>Abrams, Amber; South African Medical Research Council, Cochrane South Africa<br>Muller, Jocelyn; South African Medical Research Council, Cochrane South Africa<br>Schmidt, Bey-Marrié; South African Medical Research Council, Cochrane South Africa<br>Volmink, Jimmy; South African Medical Research Council, Cochrane South Africa; Stellenbosch University Faculty of Medicine and Health Sciences, Deans office and Centre for Evidence Based Health Care<br>Atkins, Salla; Tampere University, New Social Research and Faculty of Social Sciences; Karolinska Institute, Department of Public Health Sciences |
| <b>Primary Subject Heading</b>: | Global health                                                                                                                                                                                                                                                                                                                                                                                                                                                                                                                                                                                                                                                                                                                                                                                                                                                                                                                                                                                                    |
| Secondary Subject Heading:      | Evidence based practice, General practice / Family practice, Health services research, Qualitative research                                                                                                                                                                                                                                                                                                                                                                                                                                                                                                                                                                                                                                                                                                                                                                                                                                                                                                      |
| Keywords:                       | Health policy < HEALTH SERVICES ADMINISTRATION & MANAGEMENT, Protocols & guidelines < HEALTH SERVICES ADMINISTRATION & MANAGEMENT, PRIMARY CARE, QUALITATIVE RESEARCH, Quality in health care < HEALTH SERVICES ADMINISTRATION & MANAGEMENT, PUBLIC HEALTH                                                                                                                                                                                                                                                                                                                                                                                                                                                                                                                                                                                                                                                                                                                                                       |
|                                 |                                                                                                                                                                                                                                                                                                                                                                                                                                                                                                                                                                                                                                                                                                                                                                                                                                                                                                                                                                                                                  |

SCHOLARONE™  
Manuscripts

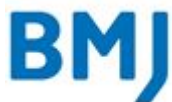

I, the Submitting Author has the right to grant and does grant on behalf of all authors of the Work (as defined in the below author licence), an exclusive licence and/or a non-exclusive licence for contributions from authors who are: i) UK Crown employees; ii) where BMJ has agreed a CC-BY licence shall apply, and/or iii) in accordance with the terms applicable for US Federal Government officers or employees acting as part of their official duties; on a worldwide, perpetual, irrevocable, royalty-free basis to BMJ Publishing Group Ltd ("BMJ") its licensees and where the relevant Journal is co-owned by BMJ to the co-owners of the Journal, to publish the Work in this journal and any other BMJ products and to exploit all rights, as set out in our [licence](#).

The Submitting Author accepts and understands that any supply made under these terms is made by BMJ to the Submitting Author unless you are acting as an employee on behalf of your employer or a postgraduate student of an affiliated institution which is paying any applicable article publishing charge ("APC") for Open Access articles. Where the Submitting Author wishes to make the Work available on an Open Access basis (and intends to pay the relevant APC), the terms of reuse of such Open Access shall be governed by a Creative Commons licence – details of these licences and which [Creative Commons](#) licence will apply to this Work are set out in our licence referred to above.

Other than as permitted in any relevant BMJ Author's Self Archiving Policies, I confirm this Work has not been accepted for publication elsewhere, is not being considered for publication elsewhere and does not duplicate material already published. I confirm all authors consent to publication of this Work and authorise the granting of this licence.

1  
2  
3 **'Building on shaky ground' – challenges to and solutions for primary care guideline implementation in**  
4  
5 **four provinces in South Africa: a qualitative study**  
6

7 Tamara Kredo<sup>1,2</sup>, Sara Cooper<sup>1,3</sup>, Amber Abrams<sup>1</sup>, Jocelyn Muller<sup>1</sup>, Bey-Marrié Schmidt<sup>1</sup>, Jimmy Volmink<sup>6</sup>,  
8  
9 Salla Atkins<sup>7,8</sup>  
10  
11  
12  
13

14 <sup>1</sup> Cochrane South Africa, South African Medical Research Council  
15

16 <sup>2</sup> Division of Clinical Pharmacology, Faculty of Medicine and Health Sciences, Stellenbosch University  
17

18 <sup>3</sup> Division of Social & Behavioural Sciences, School of Public Health and Family Medicine, University of  
19  
20  
21 Cape Town  
22

23 <sup>6</sup> Dean's office and Centre for Evidence Based Health Care, Faculty of Medicine and Health Sciences,  
24  
25 Stellenbosch University  
26

27 <sup>7</sup> Department of Public Health Sciences, Karolinska Institutet, Tomtebodavägen 18A, 17177, Stockholm  
28

29 <sup>8</sup> New Social Research and Faculty of Social Sciences, Tampere University, PO Box 100, Tampere, Finland  
30

31  
32 Corresponding author: Tamara Kredo [tamara.kredo@mrc.ac.za](mailto:tamara.kredo@mrc.ac.za)  
33

34 Emails: Sara Cooper: [sara.cooper@mrc.ac.za](mailto:sara.cooper@mrc.ac.za); Amber Abrams: [amberabrams@gmail.com](mailto:amberabrams@gmail.com); Jocelyn  
35

36  
37 Muller: [jocelyn.muller@gmail.com](mailto:jocelyn.muller@gmail.com); Bey-Marrie Schmidt: [bey-marrie.schmidt@mrc.ac.za](mailto:bey-marrie.schmidt@mrc.ac.za); Jimmy  
38

39 Volmink: [jvolmink@sun.ac.za](mailto:jvolmink@sun.ac.za); Salla Atkins: [salla.atkins@tuni.fi](mailto:salla.atkins@tuni.fi)  
40  
41  
42  
43  
44  
45  
46  
47  
48  
49  
50  
51  
52  
53  
54  
55  
56  
57  
58  
59  
60

**Abstract****Objectives:**

Clinical guidelines support evidence-informed quality patient care. Our study explored perspectives of South African sub-national health managers regarding barriers to and enablers for implementation for all available primary care guidelines.

**Design:**

We used qualitative research methods, including semi-structured, individual interviews and an interpretative perspective. Thematic content analysis was used to develop data categories and themes.

**Setting:**

We conducted research in four of nine South African provinces with diverse geographic, economic and health-system arrangements (Eastern Cape, Western Cape, KwaZulu-Natal, Limpopo). South Africa is a middle-income country with high levels of inequality. The settings represented public-sector rural and peri-urban health facilities.

**Participants:**

Twenty-two participants with provincial and district health management roles, that comprised implementation and/or training on primary care guidelines, were included.

**Results:**

Participants recommended urgent consideration of health-system challenges, particularly financial constraints, impacting on access to the guidelines themselves and to medical equipment and supplies necessary to adhere to guidelines. They suggested that overcoming service-delivery gaps requires strengthening of leadership; clarification of roles; and, enhanced accountability. Participants suggested that inadequate numbers of skilled clinical staff hampered guideline use and, ultimately, patient care. Quality assurance of training programmes for clinicians, particularly nurses; interdisciplinary training; and, strengthening post-training mentorship were recommended. Furthermore, fit-for-purpose

1  
2  
3 guideline implementation necessitates considering the unique settings of facilities, including local  
4  
5 culture and geography. This requires guideline development to include guideline end-users.  
6

## 7 **Conclusions**

8  
9  
10 Guidelines are one of the policy tools to achieve evidence-informed, cost-effective and universal  
11  
12 healthcare. But, if not effectively implemented, they have no impact. Sub-national health managers in  
13  
14 poorly resourced settings suggested that shortcomings in the health system, along with poor  
15  
16 consultation with end-users, affects implementation. Short-term improvements are possible through  
17  
18 increasing access to and training on guidelines. However, health-system strengthening and recognition  
19  
20 of socio-cultural-geographic diversity, are prerequisites for context-appropriate evidence-informed  
21  
22 practice.  
23  
24  
25  
26  
27  
28  
29

30 **Key words:** qualitative research, clinical practice guidelines, implementation, primary care, quality of  
31  
32 care, health-systems research, health-services research, policy implementation, quality improvement  
33  
34  
35  
36

### 37 **Strengths and limitations of this study**

- 38  
39 • The qualitative research methods used enabled us to explore in-depth perspectives of those  
40  
41 involved with guideline implementation regarding what is working and what can be improved in a  
42  
43 lower-income setting with high levels of inequality.
- 44  
45 • We report interviews with provincial and district health managers in four culturally and  
46  
47 geographically diverse South African provinces, that are likely to reflect settings in other low- and  
48  
49 middle income countries. There are many primary care guidelines available in South Africa with  
50  
51  
52

1  
2  
3 different target users, further interviews may elucidate specific barriers to and enablers of  
4 guideline implementation.  
5  
6

- 7  
8 • This health systems research addressed a knowledge gap important for effective guideline  
9 implementation.  
10  
11  
12  
13  
14

15  
16  
17  
18  
19  
20  
21  
22  
23  
24  
25  
26  
27  
28  
29  
30  
31  
32  
33  
34  
35  
36  
37  
38  
39  
40  
41  
42  
43  
44  
45  
46  
47  
48  
49  
50  
51  
52  
53  
54  
55  
56  
57  
58  
59  
60

For peer review only

## Background

Primary healthcare, often the first point of contact for people within a public health system, aims to provide comprehensive, accessible, quality, cost-effective care throughout a person's life (1-3). A functioning primary healthcare system is considered indicative of a strong health system and a necessary precursor to achieving Universal Health Coverage (UHC) (2, 3). Despite clear goals and several multinational agreements over several decades, a 2017 World Bank and World Health Organization (WHO) report measuring UHC success stated that at least half of the global population does not yet access basic health services (4). Implicit in this definition is that services should be high quality, not only available (3).

Like many low- and middle-income countries, South Africa has committed to enhancing and improving the quality of primary care for UHC (5-7). However, despite the political will indicated by the White Paper for a National Health Insurance Scheme to fund UHC, the investment thus far has not been sufficient to overcome the challenges posed by colliding communicable and non-communicable epidemics alongside recognised health-system deficiencies (8-10). Health outcomes remain poor relative to other middle-income countries with similar health spend; and health care remains inequitably distributed within a two-tiered public and private system where 40% of the health budget is consumed by the private sector, despite serving only 17% of the population (11-13). Several strategic initiatives aim to address these deficiencies, including PHC re-engineering, with an emphasis on strengthening district health managers; and advancing policy planning for National Health Insurance (9, 14, 15). These initiatives place importance on clinical governance, with clinical practice guidelines (CPGs) as one named strategy for health care strengthening.

CPGs are recognised tools for health-policy implementation and quality improvement (16-18). Evidence-informed CPGs aim to recommend effective prevention, diagnostic and treatment interventions, while



1  
2  
3 minimising harm, within the limits of what a health system can afford. Guidelines represent the highest  
4 standard of healthcare quality, according to the latest evidence. In South Africa, at least 175 CPGs have  
5 been developed since 2012, largely for the management of non-communicable diseases and mostly by  
6 the Department of Health (19). While the number of CPGs available is substantial, they provide no  
7 benefit if inadequately implemented. Studies in South Africa and elsewhere have found potential  
8 implementation gaps where, despite the availability of CPGs, clinical care does not meet required  
9 standards (20-25).

10  
11  
12 Evidence-to-practice gaps pose a substantial challenge in all healthcare settings and how best to  
13 overcome them has been a longstanding debate (26-29). There are checklists available that outline  
14 potential approaches for best-practice CPG implementation (30-32). However, which strategies work,  
15 under which conditions, remains a complex and evolving research field. Generally, tailored, multifaceted  
16 interventions addressing specific barriers are better, but the benefit to health or process outcomes is  
17 often modest at best and difficult to extrapolate to different contexts (29, 33, 34). Increasingly, theory-  
18 informed approaches are used to design the complex interventions required to change behaviour, yet  
19 the cost of doing this relative to the benefit remains unclear (35-38). In South Africa, several trials  
20 evaluating evidence-informed approaches for CPG implementation find a small, but consistent benefit  
21 from targeted strategies, yet, roll-out of these context-specific strategies remains a gap (39).

22  
23  
24 Given the limited resources allocated to health, particularly in low- and middle-income settings such as  
25 South Africa, knowing how best to intervene efficiently and effectively, resulting in best quality care, is  
26 paramount (40, 41). In this context, exploring the views of those involved with CPGs is a reasonable way  
27 to learn about local needs. The South African Guidelines Excellence (SAGE) project aimed to understand  
28 primary care CPG development, implementation and capacity needs (42). For the qualitative

1  
2  
3 component of SAGE, we interviewed diverse role players involved in primary care CPG development,  
4 implementation and/or use. We have reported the findings from national CPG developers (43, 44);  
5  
6 frontline healthcare workers who use CPGs (37); as well as allied healthcare providers regarding CPG  
7  
8 development and implementation (45-48). In this paper, we build on this work but delve further into the  
9  
10 area of health system and service governance to explore the perspectives of provincial and district  
11  
12 health managers who have responsibility for CPG implementation. We aimed to explore the  
13  
14 perspectives of these provincial and district managers regarding barriers to and enablers for primary  
15  
16 care CPG implementation in four provinces in South Africa  
17  
18  
19  
20  
21  
22

## 23 **Methods**

### 24 *Design*

25  
26 We used qualitative methods from an interpretative paradigm to understand the experiences and  
27  
28 perspectives of provincial and district managers responsible for primary care guideline implementation.  
29  
30 The methods and study context have been described in detail elsewhere (37), and thus only a summary  
31  
32 is provided here, together with a detailed description of the participants and analysis methods used.  
33  
34  
35  
36  
37  
38

### 39 *Study settings*

40  
41 South Africa is an upper middle-income country with a population of 58.8 million in 2019 (49); however,  
42  
43 its population faces amongst the highest rates of inequality globally (50). Over several decades, the  
44  
45 national government has increased emphasis on PHC services managed through 44 district offices across  
46  
47 nine provinces, ranging from two to 10 districts in each province (9, 49, 51-53). Districts are  
48  
49 administrative sub-sections of the province, usually run as part of local government. Legislation has  
50  
51 recently been introduced that supports the implementation of UHC, through a National Health  
52  
53 Insurance system (15). In general, national government develops health strategies and CPGs; and  
54  
55  
56  
57  
58  
59  
60

1  
2  
3 provincial governments implement them through regional, district, or community healthcare facilities  
4  
5 and their providers (11). Primary care providers include nurses, doctors, nutritionists, physiotherapists,  
6  
7 dentists, occupational therapists and social workers. However, primary care clinics are largely nurse-run,  
8  
9 with access to the additional providers intermittently or at larger district facilities. There are several  
10  
11 primary care guidelines endorsed by the national government for public-sector use. These include  
12  
13 condition-specific guidelines (e.g. basic antenatal care, human immune deficiency virus (HIV) and  
14  
15 tuberculosis) or integrated guidelines (e.g. Essential Medicines list, Adult Primary Care, Integrated  
16  
17 Management of Childhood Illness) (54). Several programmes to strengthen district clinical governance  
18  
19 have been introduced and are linked to CPG implementation: 1) The Ideal Clinic, defined as a "clinic with  
20  
21 good infrastructure, adequate staff, adequate medicine and supplies, good administrative processes,  
22  
23 and sufficient adequate bulk supplies", includes ensuring access to and use of CPGs (54); and, 2)  
24  
25 'primary health care re-engineering' which aims to strengthen district healthcare management through  
26  
27 community health workers; school health programmes; and District Clinical Specialist Teams (DCSTs)  
28  
29 (14). DCSTs include: a family physician, primary healthcare nurse, obstetrician, advanced midwife,  
30  
31 paediatrician, paediatric nurse and anaesthetist. The family physician and primary health care nurse are  
32  
33 central to primary care CPG implementation through their clinical governance role, including ensuring  
34  
35 the provision of training and mentorship to implement nationally endorsed CPGs. They have limited  
36  
37 clinical roles, but rather take on management and supervision roles for the facilities they support.  
38  
39 As outlined in the introduction, this is a sub-study of the larger SAGE Project that interviewed a range of  
40  
41 role players in primary care guideline development, implementation and use in South Africa. In this sub-  
42  
43 study, we explore the views of provincial and district health managers responsible for guideline  
44  
45 implementation. This includes provincial managers with oversight of programmes such as Primary Care  
46  
47 an district managers with strictly management roles and those with clinical governance and  
48  
49  
50  
51  
52  
53  
54  
55  
56  
57  
58  
59  
60

1  
2  
3 support/training roles (e.g. members of the District Specialist Clinical Teams) or those responsible for  
4 training. All participants we interviewed have roles in primary care CPG implementation.  
5  
6  
7  
8  
9

### 10 *Sampling and recruitment*

11 Sampling took place in four of the nine provinces in South Africa - Western Cape (WC), KwaZulu-Natal  
12 (KZN), Eastern Cape (EC) and Limpopo (LP)- chosen for their socio-economic , geographical and cultural  
13 diversity. (37, 51). Within each province, we aimed to interview 20 participants from the about  
14 provincial office and from two district offices in person at their place of work or a preferred venue. We  
15 obtained approval from Provincial Research Units prior to conducting interviews. In the Eastern Cape we  
16 were invited to present at a provincial research day, where we received buy-in for our planned research  
17 (37). In the Western Cape we contacted known provincial managers involved with PHC CPGs. In the  
18 other provinces, we invited individuals recommended by the Provincial Research Units. Hence sampling  
19 was both purposive, as we sought to include individuals with specific experience in PHC CPG  
20 implementation; and, through convenience, when specific individuals, meeting our criteria, were  
21 recommended and available to be interviewed. Once access was negotiated, all those invited agreed to  
22 participate.  
23  
24  
25  
26  
27  
28  
29  
30  
31  
32  
33  
34  
35  
36  
37  
38  
39  
40

### 41 *Patient and Public Involvement*

42 CPGs are tools that aim to directly impact patient care and guide clinician-patient engagement. In South  
43 Africa, there is little research evidence regarding patients' views about CPGs. The research question was  
44 developed with patients in mind, but we were seeking perspectives of provincial and district health  
45 managers in primary care, and neither patients nor the public were included. The results of the research  
46 will be shared with the participants.  
47  
48  
49  
50  
51  
52  
53  
54  
55  
56  
57  
58  
59  
60

### *Data collection and management*

Individual interviews were considered most appropriate to provide in-depth insights into people's lived experiences (55). We used a semi-structured interview guide (Supplementary file 1), asking about experiences of CPG adaptation and implementation processes, and about potential barriers to and enablers of successful implementation. The guide was adapted iteratively, drawing on insights from previous interviews and included open-ended questions to allow participants to direct the emphasis of the interview (55). Interviewers received training in interviewing and two interviewers were present at all interviews. TK, a medical doctor with qualitative interview training, led most of the interviews, accompanied by AA, JM or other research team members. Interviews were conducted in English and lasted 60 – 90 minutes. There were no requests for translation despite the various first languages spoken in the provinces. All interviews were individual, with two exceptions in which colleagues joined the interview at the request of the invited participant. One interview took place telephonically at their request due to challenges with scheduling.

All interviews were recorded. After each interview, reflections and summaries were written to capture initial insights and identify points for further exploration in subsequent interviews. Interviews were transcribed verbatim, and reviewed for accuracy (TK, TM). Data were stored electronically on password-protected computers; and consent forms stored in a locked cabinet.

### *Analysis*

We used an iterative, thematic content analysis approach (55, 56). Three researchers read initial transcripts (TK, AA, SA) and agreed on the general meaning and main issues presented. One researcher (TK) then re-read transcripts, performing open coding to explore barriers to and enablers of CPG implementation, extracting the relevant quotes/coding units. TK then used the quotes to explore the

1  
2  
3 topics raised, unpack the meanings of statements made, while categorising the arising themes (57).  
4  
5 Categories and their related quotes were further examined (TK, SC, BS, SA) to identify meaningful  
6  
7 themes (58). Following this, results were discussed with SA to develop the analysis further and then  
8  
9 presented to all authors for input and verification prior to finalisation. The research team was  
10  
11 interdisciplinary including public health, medical doctors, and social scientists enabling various views to  
12  
13 enrich the interpretation.  
14  
15

### 16 17 18 19 Trustworthiness

20  
21  
22 Several measures were undertaken to ensure that the research process was trustworthy, authentic and  
23  
24 dependable in order that the findings would be a credible reflection of reality. Detailed capturing and  
25  
26 rich description of our approaches, including that of sampling, data collection, data management, and  
27  
28 analysis, were conducted to enhance the dependability of our findings (58). Quotations were included to  
29  
30 provide readers the opportunity to interpret data, establish confirmability and to show data richness.  
31  
32 Complementary research competencies and experiences of the multidisciplinary team of researchers  
33  
34 (social science, medical practice, CPG development and implementation) influenced data interpretation  
35  
36 and strengthened study rigour. Transferability to a broader readership was demonstrated through  
37  
38 information about the sample, setting and provision of a sufficiently detailed report to consider  
39  
40 relevance to others. Reflexivity and the researchers' positionings were considered throughout the  
41  
42 process of data collection and analysis, thus enhancing the confirmability of the findings.  
43  
44  
45

### 46 47 **Results**

48  
49 Twenty semi-structured interviews were held with 22 participants from September 2015 to August 2016  
50  
51 (Table 1). Participants had previously worked in clinical positions as nurses (n = 15), or doctors (n = 7),  
52  
53 but were currently occupying management positions. These provincial and district managers were  
54  
55 responsible for health-service delivery and worked in PHC generally or within specific clinical  
56  
57  
58  
59

1  
2  
3 programmes (e.g. HIV, non-communicable diseases), or in operational roles. Amongst these were the  
4  
5 District Clinical Specialists worked at primary and district healthcare facilities providing management  
6  
7 and clinical governance oversight. Our final sample included provincial managers representing four  
8  
9 provinces; district managers from two districts in each of the four provinces. District Clinical Specialists  
10  
11 were included in in Limpopo, KZN and Eastern Cape, however, the Western Cape has not implemented  
12  
13 the DCST programme.  
14  
15  
16  
17  
18

|                                                                                                                                                               |                                                                                                                                                                                                                                                                                                                                        |
|---------------------------------------------------------------------------------------------------------------------------------------------------------------|----------------------------------------------------------------------------------------------------------------------------------------------------------------------------------------------------------------------------------------------------------------------------------------------------------------------------------------|
| <b>Table 1. Description of the research participants</b> Provincial and district managers and trainers with primary healthcare guideline implementation roles | 20 interviews (22 participants)                                                                                                                                                                                                                                                                                                        |
|                                                                                                                                                               | Previous clinical disciplines: nurses = 15, doctors = 7                                                                                                                                                                                                                                                                                |
|                                                                                                                                                               | Province conducted:<br><i>KwaZulu-Natal</i> : 4 interviews (1 in province, 3 in district offices)<br><i>Limpopo</i> : 4 interviews (2 in province and 2 in district offices)<br><i>Eastern Cape</i> : 6 interviews (2 in province, 4 in district offices)<br><i>Western Cape</i> : 6 interviews (5 in province, 1 in district offices) |

19  
20  
21  
22  
23  
24  
25  
26  
27  
28  
29  
30  
31  
32  
33  
34  
35  
36  
37  
38  
39  
40 Most participants considered CPGs credible sources to guide clinical practice and, importantly, believed  
41  
42 that CPGs impact positively on patients' health. Some participants described that CPGs can '*save a life*'.  
43  
44 District managers with a medical background particularly shared views regarding the value of CPGs,  
45  
46 stating that they are '*evidence-based and it works... mortality goes down when we do things properly*'.  
47  
48 Further sentiments supporting CPGs included '*harmonisation of practice*', '*quality improvement*', and  
49  
50 '*rational*' medicine use.  
51  
52  
53  
54  
55  
56  
57  
58  
59  
60

1  
2  
3 Despite widespread belief in the credibility and positive impact of CPGs, participants felt that CPG  
4 implementation is currently inadequate and described the multiple challenges they face in this regard.  
5  
6 We have organised these into two main themes namely: 1) health-system factors and, 2) socio-cultural  
7  
8 contextual issues.  
9  
10

### 11 12 13 Health-system factors 14

15  
16  
17 Provincial managers experienced CPG implementation as challenging, under-resourced, and sometimes  
18 insufficiently planned. They suggested that CPGs were not the issue, but rather that the capacity of the  
19 health systems to support implementation posed the greatest challenge. A provincial manager who had  
20 worked in several provinces explained: *'training and the guidelines are fine, but the bed rock on which*  
21 *we are building is not – we are building on shaky ground'* (Provincial manager, WC).  
22  
23  
24  
25  
26  
27  
28  
29

### 30 Financial constraints 31

32  
33 Financial constraints were recurring issues across provinces. Frustration was expressed by some that  
34 funding across different conditions was inequitable, with more funding for HIV and tuberculosis, *'but the*  
35 *other big killers'* such as non-communicable diseases received little or *'no support'*. This situation was  
36 often driven by international donor funding, which influenced which CPGs were prioritised for  
37 implementation.  
38  
39  
40  
41  
42  
43  
44

45 Access to the right tools and equipment was perceived as a prerequisite for successful CPG  
46 implementation. However, all participants spoke about budgetary constraints, and a resulting lack of, or  
47 poorly serviced, clinic equipment and stocks with the associated impact on CPG implementation. A PHC  
48 district manager stated:  
49  
50  
51  
52  
53  
54  
55  
56  
57  
58  
59



1  
2  
3 *'Budgetary constraints are still a challenge, the systems are still a challenge, they are hindering the*  
4 *implementation of these guidelines. For you to get a blood-pressure machine, you have to wait for*  
5 *more than two months. If this scale is broken, you should follow a tender process for that scale to*  
6 *be repaired, so the systems are killing the implementation of guidelines also, the procurement and*  
7 *supply-chain systems'* (District manager, EC).  
8  
9  
10  
11  
12  
13  
14

15 Furthermore, the simple issue of limited access to CPG copies on site, due to budgetary constraints, was  
16 highlighted as an additional barrier for using CPGs. As reflected on by a district manager in rural Eastern  
17 Cape *'I mean you are just lucky if you get them'*.  
18  
19  
20  
21

22 Several district managers also mentioned that *'the challenge is about printing the guidelines'* due to  
23 budget allocations from national government. Solutions were offered to overcome both the poor quality  
24 of, and poor access to, CPG copies. A dominant view was that digital access would mitigate these issues  
25 and increase *'click and check'* CPG access. Several managers suggested, however, that both the printed  
26 and digital versions are needed; for example, one rural district manager said: *'They [older healthcare*  
27 *providers] like the booklet, but the young ones like the app'* (Provincial manager, LP).  
28  
29  
30  
31  
32  
33  
34  
35  
36

37 Despite many participants highlighting the potential value of increasing digital CPG access, financial  
38 barriers were expressed in all provinces, as one manager suggested *'no computers, no internet, there's*  
39 *no connection'* (District manager, KZN). This was repeated by others: *'I don't think you will find a single*  
40 *computer that's got any connection to anything'* (District manager, KZN).  
41  
42  
43  
44  
45  
46

47 In addition, a district manager in an urban context explained the dilemma of investing in digital solutions  
48 in the face of limited funding. She asked: *'Do you want to buy more computers, or do you want more*  
49 *medication?'* (District manager, WC).  
50  
51  
52  
53  
54

## 55 **Governance and leadership**

56  
57  
58  
59  
60

1  
2  
3 Senior managers explained that effective CPG implementation required strong governance including  
4 clarity regarding responsibility, and how implementation should be delivered and monitored. *'...it's an*  
5 *issue of governance, how is implementation of guidelines governed and whose responsibility is it and do*  
6 *we have enough capacity to manage governance'* (Provincial manager 2, WC).  
7  
8  
9  
10  
11

12 District management was perceived as demotivated because the volume of policies requiring  
13 implementation left them feeling *'completely bombarded and confused'*. In addition, lack of support for  
14 implementation, or in some circumstances the punitive approach taken towards managers struggling  
15 with implementation within very challenging health systems, was perceived as demoralizing. A senior  
16 manager, having worked in several provinces with differing infrastructure, described his experience:  
17  
18  
19  
20  
21  
22  
23

24  
25 *'There are good people at ground level, but without a level of protection and support they kind*  
26 *of just get nailed. So every new policy is looked upon with dread because you are worried that*  
27 *at some point somebody is going to come and say you are not implementing it'* (Provincial  
28 manager, WC).  
29  
30  
31  
32  
33  
34

35 Managers offered various solutions, explaining that it was not only the remit of public servants to lead  
36 CPG implementation. Community champions and leaders were suggested as additional enablers of CPG  
37 implementation. Within the health workforce, this included senior academics who inspired junior staff;  
38 while in the community it was community leaders, including traditional chiefs or religious leaders who  
39 endorsed local facilities and encouraged patients to follow guidance.  
40  
41  
42  
43  
44  
45  
46

47 Further recommendations to support governance included developing relationships with non-  
48 governmental organisations (NGOs), known as 'partners'. Given the limited provincial budgets, partners  
49 were often perceived as the only means for providing training or developing materials for CPG  
50 dissemination. Partners were mentioned, particularly in the Eastern Cape, both at the provincial and  
51  
52  
53  
54  
55  
56  
57  
58  
59  
60

1  
2  
3 district level, as one district manager explained *'when the guideline is out, we need to call them [NGO*  
4 *partners] to be part of us'*. However, this also raised the issue of sustainability as there was a risk that  
5  
6 when NGO funding ended, services would be withdrawn, and local government lacked capacity to  
7  
8 maintain the activities, potentially undermining care.  
9  
10

### 11 12 13 **Accountability approaches**

14  
15  
16 Several managers suggested accountability mechanisms to enhance implementation. For example,  
17  
18 audits and feedback to measure CPG use was an accountability and quality-improvement approach cited  
19  
20 by various participants. This approach was reportedly functioning better in certain provinces. A  
21  
22 provincial manager in the Western Cape described a constructive experience:  
23

24  
25  
26 *'(Based on the) situational analysis and audits ... we pick up the gaps in quality and we start*  
27  
28 *looking at what is our opportunity to, either tweak a guideline, develop a guideline or a tool or*  
29  
30 *piece of stationary or an algorithm or flow chart that will close that gap'* (Provincial manager,  
31  
32 WC).  
33  
34  
35

36 While accountability mechanisms were perceived by some as essential, most managers, on the contrary,  
37  
38 described audits as punitive and obstructive, with potential negative consequences. This statement by  
39  
40 one provincial manager is indicative of many similar statements by others: *'then comes the monitoring*  
41  
42 *and evaluation people to monitor that thing, not in a nurturing way, but in a "why didn't you hit your*  
43  
44 *targets kind of way"'* (Provincial manager, WC). This concept of punitive audits emerged from several  
45  
46 provinces. One senior manager spoke about a *'compliance culture'* in which focus was directed primarily  
47  
48 to what is measurable, such as structural inputs like infrastructure, and the blame that ensues if these  
49  
50 targets are unmet.  
51  
52  
53  
54  
55  
56  
57  
58  
59  
60

1  
2  
3           *'... when it comes to focusing on clinical guidelines if no one is auditing that in the same way. So,*  
4  
5           *the Auditor General is this big bogey man out there. If anything goes wrong, then, of course, the*  
6  
7           *province gets into big trouble. So, there is a lot more gravitas or seriousness attached when the*  
8  
9           *Auditor General says something...'* (Provincial manager, WC).

10  
11  
12  
13 Another participant from the Eastern Cape provided an analogous account:

14  
15  
16           *'We will comply and complain later, if there is a time to complain. But what is emphasised, is*  
17  
18           *compliance. There is that strict compliance. Compliance. If you don't comply, it means you are*  
19  
20           *failing your district, or your sub-district, or your clinic or your people. There is no time for*  
21  
22           *complaining or reflecting, it is compliance'* (District manager, EC).

23  
24  
25  
26 The compliance culture and aversion to punitive action was thought to have negative effects on CPG  
27  
28 implementation and patient care. Participants indicated how the compliance and audit systems *'just*  
29  
30 *adds to the frustration', 'distracts'* from the focus on clinical care and ultimately results in rushing ahead  
31  
32 to meet targets, or as one manager put it: *'running around like a headless chicken'* (District manager,  
33  
34 EC).

### 35 36 37 38 **Human resource constraints**

39  
40  
41 Health workforce constraints were emphasised as pertinent to CPG implementation. Managers  
42  
43 described the mismatch between the growing workload and unchanging staff numbers:

44  
45  
46           *'we have this burden of disease that is growing. We have resources that are shrinking. So more*  
47  
48           *of our health workers are being asked to do more with less resources'* (Provincial manager, WC).

49  
50  
51  
52 Health workforce barriers to CPG use were described as three-fold: staff shortages, insufficient time,  
53  
54 and inappropriately qualified staff unable to fulfill required tasks. These issues resulted in staff being  
55  
56  
57  
58

1  
2  
3 *'overstretched'* and *'not coping'*. It was suggested that staff experience considerable time pressures due  
4  
5 to their heavy workloads, *'continuously dealing with patients'* as well as pressure from patients wanting  
6  
7 them to work *'fast, fast, fast'*. As one provincial manager lamented:  
8  
9

10  
11 *'...they [nurses] have no time to look at guidelines, they have no time to do quality work to check*  
12  
13 *the quality issues because they are continuously dealing with patients'* (Provincial manager, LP).  
14  
15

### 16 **Capacity gaps and opportunities**

17  
18 Linked with human resources is capacity building. Training was emphasised as the primary means by  
19  
20 which CPGs are implemented. Participants generally agreed that to support implementation *'you can't*  
21  
22 *just automatically know how to do things, you need to be trained'*. Therefore, building skills and  
23  
24 knowledge was understood as a prerequisite to changing practice.  
25  
26

#### 27 *Primary care nurse training gaps*

28  
29  
30  
31 An issue raised mostly by nurse managers was the poor state of professional training of PHC nurses.  
32  
33 Nurses were described as *'not skilled'* and the nurse training syllabuses *'outdated'*, raising concerns that  
34  
35 nurses entering practice were inadequately prepared. In the most extreme example, a provincial  
36  
37 manager suggested that *'student nurses come out blank... they are the ones that are causing all these*  
38  
39 *deaths'*.  
40  
41  
42

43  
44 Several suggestions were made for optimising training and support through: 1) training delivery  
45  
46 approaches; and, 2) post-training clinical support.  
47  
48

#### 49 *Considerations during training*

50  
51 Regarding training itself, access to workshops and ensuring adequate coverage of staff was identified as  
52  
53 a significant challenge. Various participants indicated that *'onsite training is the best one'*, as when  
54  
55  
56  
57  
58

1  
2  
3 training was delivered off-site, fewer staff could attend, and disseminating learning when back at  
4 facilities was ineffective: *'they [the nurses] don't cascade the information'*. However, *'lack of time'* and  
5 *'budgetary constraints'* to provide training in every facility was their reality. Therefore, finding  
6 contextually appropriate training approaches were suggested, such as *'training local people to be*  
7 *trainers'* and working with NGOs that have more training resources. Furthermore, ensuring that DCSTs  
8 are maximally used to provide training was considered key. As a district manager in Limpopo suggested:  
9

10  
11  
12  
13  
14  
15  
16  
17 *'DCST staff are now doing the training per facility, no more calling people to a centralised place...*  
18 *and also [doing] the support visit in the facility'* (District manager, LP).  
19

20  
21  
22  
23 Several participants recommended that training should be interactive, not didactic. Many commended  
24 the practical skills training, so-called *'fire drills'*, used for maternal health training. This training requires  
25 staff to demonstrate a response to an emergency during the training, but also subsequently on-site at  
26 unexpected intervals.  
27  
28  
29

30  
31  
32  
33 Despite many challenges identified regarding nurse training, nurses were still considered to have better  
34 access to training than doctors, resulting in outdated practices by doctors. It was reported that doctors  
35 are excluded from training. Participants recommended that training should be interdisciplinary, bringing  
36 all clinical disciplines onto the same level. As a senior manager with a medical background suggested,  
37 *'the nurse now knows more than the doctor. So you have to train everybody at the same time'* (District  
38 clinician, KZN).  
39  
40  
41  
42  
43  
44  
45

#### 46 47 *Post-training recommendations*

48

49  
50  
51 Following training, a critical gap raised repeatedly was the absence of *'clinical support'* and *'mentoring'*.  
52  
53 As a district clinician suggested, *'we desperately, desperately need mentors'*. It was emphasised that  
54  
55  
56  
57  
58  
59  
60

1  
2  
3 even with access to up-to-date, high-quality CPGs, when post-training support is poor, implementation  
4  
5 gaps were likely, as captured by the following quote:  
6  
7

8 *'On-site facility mentoring, it's a problem ... without that, we can have much, much guidelines,*  
9  
10 *good guidelines, but if there's no on-site mentoring, we are just wasting the government's*  
11  
12 *money'* (District clinician, KZN).  
13  
14  
15

## 16 17 18 19 20 Socio-cultural and geographic challenges to CPG implementation 21 22

23  
24 In addition to health-system factors, socio-cultural and geographic factors were raised by most  
25  
26 participants, particularly those in district settings presumably closer to the day-to-day requirements of  
27  
28 health-service delivery. The explanation given was that there is a mismatch between what is  
29  
30 recommended in CPGs and what was acceptable due to culture or feasible in rural settings.  
31  
32  
33

### 34 35 **Acceptability and cultural considerations** 36

37  
38 Several specific CPGs that posed challenges to implementation were mentioned. For example, the CPG  
39  
40 recommending voluntary male medical circumcision was emphasised as being at odds with cultural  
41  
42 beliefs and norms in settings where traditional circumcision required specific rituals. As one female  
43  
44 manager with a nursing background described:  
45  
46  
47

48 *'... male circumcision, it is a taboo for me to talk about circumcision. Now you tell people go and*  
49  
50 *do the medical male circumcision. It is as now you are insulting their culture'* (District manager,  
51  
52 EC).  
53  
54  
55

1  
2  
3 Another example related to when mothers with newborns require follow-up clinic visits after delivery,  
4  
5 whereas, in some traditional cultures, leaving home for a specified period post-delivery is frowned upon:  
6  
7

8 *'After birth, she must stay at home until 10 days'* (District manager, EC).  
9  
10

### 11 **Geographic barriers**

12  
13

14  
15 Geography also posed barriers to CPG implementation. The distance and difficult environmental  
16  
17 circumstances under which many patients must travel to attend clinic appointments make the  
18  
19 implementation of certain CPG recommendations unfeasible:  
20  
21

22  
23 *'A woman in the Eastern Cape will have to travel 5 kilometres or even more to reach the clinic, so*  
24  
25 *how would you ensure that you reach the clinic 6 days after birth? Those are things that, at*  
26  
27 *times, are impossible when you look at the guidelines'* (District manager, EC).  
28  
29

30  
31 *'... in rural areas, people are scattered, and there are rivers when it is raining, they can't go to*  
32  
33 *that facility ... there was rain for the whole month and then there were floods, and maybe the*  
34  
35 *bridges are then just swept away with the floods. And then people who can't go to that clinic to*  
36  
37 *go and fetch their treatment for diabetes and hypertension'* (Provincial manager, EC).  
38  
39  
40  
41  
42  
43

### 44 **One size fits all approach to CPG development**

45  
46

47 Critically, the disparity between CPG recommendations and their feasibility was perceived to result in  
48  
49 unsuccessful CPG implementation and subsequent failure on standardised national indicator *'report*  
50  
51 *cards'*:  
52  
53  
54  
55  
56  
57  
58  
59



1  
2  
3 *'Most of the time we will be Number 0 [on audit reports] ....., because it [the guideline] is not*  
4 *implemented in the Eastern Cape. It's not working. But they [national government] will always*  
5 *say Eastern Cape is Number 0. It's Number 0 because the tool does not fit here, it's [the*  
6 *guideline] is just not right, they are using something which is round in a square hole...'* (Provincial  
7  
8 manager, EC).  
9  
10  
11  
12  
13  
14

15 Many provincial managers reported that consultation between national and provincial government was  
16 happening, prior to finalisation of a CPG, to address contextual barriers:  
17  
18

19  
20  
21 *'So I think in terms of implementation what I've seen works really well is when people have been*  
22 *part of the process from the policy development side from the word go'* (Provincial manager,  
23  
24 WC).  
25  
26  
27

28 However, many participants, particularly district managers, did not feel consultations were done  
29 consistently and in meaningful ways to ensure that the final CPGs and linked indicators were aligned  
30 with geographical and cultural contexts. Many felt that CPG content was *'one size fits all'* and that  
31 examples of contextually appropriate implementation were limited.  
32  
33  
34  
35  
36  
37

38 Despite participants emphasising the importance of context, processes for the contextual adaption of  
39 CPGs were not routinely described. One exception was an example provided about the structured  
40 approach to adopt, adapt, or develop new CPGs in the Western Cape. A provincial manager noted:  
41  
42  
43  
44

45  
46 *'... either use the policy from national as is or we either translate it for the local context or we*  
47 *develop policy, because national just hasn't done it'* (Provincial manager, WC).  
48  
49  
50  
51  
52  
53  
54

## 55 Discussion

56  
57  
58  
59  
60

1  
2  
3 This study explored perspectives of South African provincial and district health managers on potential  
4 barriers to and enablers of primary care CPG implementation. Two major themes emerged. The first  
5 related to broader health-system factors, such as financial constraints, governance and health workforce  
6 capacity gaps. The second emphasised the importance of socio-cultural and geographic factors, and the  
7 need for CPGs to be adapted to fit local contexts.  
8  
9  
10  
11  
12  
13  
14  
15

16 Regarding health-system factors, we found that, despite managers' willingness to support PHC CPG use,  
17 the relative dysfunction of the health system posed barriers to doing so. Aspects of this theme mirrored  
18 several of the often cited WHO health system building blocks, including leadership and governance;  
19 financial arrangements; health service arrangements and implementation strategies, such as training  
20 (59, 60).  
21  
22  
23  
24  
25  
26  
27  
28  
29

30 Strong leadership is required to drive CPG implementation (60, 61). Participants, all of whom occupy  
31 responsible management positions, described governance gaps affecting CPG implementation, a factor  
32 also identified in other studies in sub-Saharan African countries (62). Participants described volumes of  
33 incoming policies without time for consultation, adaptation or planning; and rushed implementation  
34 responding to political drivers rather than healthcare quality considerations. To address this challenge,  
35 managers often partnered with community leaders and NGOs. This was deemed necessary, particularly  
36 in the Eastern Cape, a province where many health system and financial issues were emphasised by our  
37 participants and have been highlighted in national reports (7, 9). CPG implementation strategies take  
38 many forms, including professional development, dissemination of summary products to patients and  
39 healthcare providers, use of key opinion leaders, to name a few (33). In the South African setting,  
40 delegating responsibility to partners with relevant skills and resources is necessary, however,  
41 participants were concerned about sustainability of donor-funded activities.  
42  
43  
44  
45  
46  
47  
48  
49  
50  
51  
52  
53  
54  
55  
56  
57  
58  
59  
60

1  
2  
3  
4  
5 Relatedly, accountability was a reported gap, and, in particular, clarity regarding who is responsible for  
6  
7 CPG implementation and how best to monitor success. For monitoring, audit and feedback was  
8  
9 proposed, a quality improvement strategy premised on the notion that clinicians may change their  
10  
11 performance when they receive feedback regarding sub-standard practice (63). Those we spoke to  
12  
13 provided examples of constructive audit and feedback allowing managers to adapt implementation to  
14  
15 address gaps. However, mostly, audits were experienced as punitive, driving managers to '*comply*'  
16  
17 rather than innovate. A systematic review of 49 trials of audit and feedback found that this approach  
18  
19 should benefit CPG implementation (63). Importantly, this review identified success factors that need  
20  
21 be considered, including whether the baseline performance of health professionals is low to start with;  
22  
23 feedback is recurrent and given both verbally and in writing; and, the process includes clear targets and  
24  
25 action plans (63). Our findings suggest that further factors may need to be considered, such as feasibility  
26  
27 and context, to ensure that implementers feel empowered, rather than discouraged or demotivated, by  
28  
29 audit and feedback systems.  
30  
31  
32  
33  
34  
35  
36

37 Most participants described CPG implementation as reactive, rather than proactive, driven by demands  
38  
39 to implement without adequate time or funds to do so effectively. Participants spoke of a '*compliance*  
40  
41 *culture*' and explained that requirements were heavily weighted towards administrative reporting rather  
42  
43 than consideration of clinical quality improvement. Within the field of 'quality of care' measurement, a  
44  
45 long-standing model posited by Donabedian proposed three measurable facets of quality of care: 1)  
46  
47 structure (e.g. inputs to care such as facilities, staffing); 2) process (e.g. clinical care); and, 3) outcomes  
48  
49 (e.g. health outcomes, patient satisfaction) (64, 65). In South Africa, the apparent emphasis on structural  
50  
51 measurement, is unlikely to be sufficient, as shown by a multi-country, cross-sectional study in similarly  
52  
53 poor settings which found that infrastructure reports correlated poorly with clinical care or CPG  
54  
55  
56  
57  
58  
59  
60

1  
2  
3 adherence (66). Drawbacks of this narrower structural and process focus have also been described in  
4  
5 the UK's National Health Service, where attempts to create efficiency resulted in '*compliance-oriented*  
6  
7 *bureaucratised management*' and was felt to hinder rather than enable quality service delivery (67).  
8  
9

10  
11  
12 Financial constraints were identified as critical factors limiting effective CPG implementation. Lack of  
13  
14 basic equipment, and CPG books was described as the norm. Additionally, lack of infrastructure,  
15  
16 including internet or devices, was a perceived barrier to using CPGs. These views mirrored those of PHC  
17  
18 providers in the same districts that we spoke to who described that they would be more likely to use  
19  
20 CPGs if digital access was possible (37). However, like the managers, they perceived lack of internet in  
21  
22 facilities, and exorbitant costs of data required for downloading CPGs, as barriers to digital access (37).  
23  
24  
25

26  
27  
28 Human resource constraints, such as clinical workload and understaffing, was another health-system  
29  
30 issue hindering CPG implementation, a finding that echoes a sub-study of PHC clinical staff in these  
31  
32 districts (37). Training is the mainstay of capacity building for human resources for health. It is vital for  
33  
34 building skills and knowledge to implement CPGs, but is also a form of enablement for teams more  
35  
36 generally. In South Africa, like many low- or middle-income settings, nurses are the backbone of PHC  
37  
38 services. Yet, poor-quality nurse training was a concern, associated with outdated curricula, inaccessible  
39  
40 training sites and a presumed impact on patient care. Similar findings have been reported from other  
41  
42 research in South Africa, for example in the context of antenatal care guideline adherence (68). This is a  
43  
44 global challenge, with the WHO recognising the importance of quality health workforce training in  
45  
46 realising UHC (69). One of the contradictions from our findings was that despite training gaps and  
47  
48 primary care provider workload, one of the doctors said that '*nurses know more than doctors*'. This was  
49  
50 in reference to the view that nurses have more training opportunities and are also more motivated to  
51  
52 use current CPGs than doctors. Our previous research with primary care providers supports this finding  
53  
54  
55  
56  
57  
58  
59  
60

1  
2  
3 of more willingness to use guidelines by nurses, compared to doctors, but further research is needed to  
4  
5 explore this issue (37).  
6  
7  
8  
9

10 To overcome these challenges, many participants pointed to the importance of post-training clinical  
11 mentorship. When in place, this was perceived to provide the necessary, case-based, in-facility support  
12 for CPG implementation and role-modelling of CPG use. This view has been reported by other South  
13 African studies, in particular a study exploring the Ideal Clinic programme implementation suggested  
14 that family doctors in the DCSTs have similar perspectives regarding the importance of mentorship (70,  
15 71).  
16  
17  
18  
19  
20  
21  
22  
23  
24

25 In addition to health-systems issues, the importance of context emerged as a significant theme. Within  
26 the public sector, CPG production in South Africa is generally the responsibility of the National  
27 Department of Health and implementation a provincial mandate, with further devolvement of decision  
28 making to districts (9). This decentralised approach is advocated globally, particularly for health systems  
29 progressing to UHC to enable more responsive, ground-up health services (72). However, we learned  
30 from our participants that the problem with this is two-fold. Firstly, health indicators are aligned with  
31 national strategies, which do not consider differences between provinces. Secondly, local teams lack  
32 time and specific training in the adaptation of the CPGs for their setting. These concerns were also  
33 expressed by national primary care CPG developers, who described that the fragmentation between and  
34 within provinces likely hampers implementation (43). According to our participants, implementation of a  
35 'one size fits all' national CPG may result in several negative consequences, including poor scores on  
36 national indicators due to unfeasible recommendations that are not adequately implemented ('round  
37 peg in a square hole' analogy); and rushed implementation to align with a national programme or  
38 political drive.  
39  
40  
41  
42  
43  
44  
45  
46  
47  
48  
49  
50  
51  
52  
53  
54  
55  
56  
57  
58  
59  
60

1  
2  
3  
4  
5  
6 Despite, and perhaps because of, the contextual challenges these managers encountered, many  
7  
8 described innovative approaches to overcome geographic barriers or cultural issues. For example, a  
9  
10 female manager in the Eastern Cape led the development of a male nurse-led programme for medical  
11  
12 male circumcision because in her setting for women to discuss circumcision is a cultural taboo. In  
13  
14 addition, where geographical barriers arose, such as flooding rivers, district managers tried to provide  
15  
16 vehicles and airtime to community healthcare workers to reach patients. This was not always successful,  
17  
18 due to financial barriers and inadequate procurement processes. A number of managers described plans  
19  
20 that required impressive ingenuity and commitment to overcome health system and contextual barriers,  
21  
22 despite all odds, and seemingly with little recognition. Additionally, despite the managers' evident  
23  
24 wealth of knowledge, experience and creative solutions, when pressed, there was a notable absence of  
25  
26 examples provided by participants of opportunities to share lessons learned, innovative approaches, and  
27  
28 successes or challenges between and within districts or provinces.  
29  
30  
31  
32  
33

34  
35 Taken together, these health-system and contextual barriers to CPG implementation are recognised in  
36  
37 various CPG frameworks as potential challenges to implementation (31, 73). However, arguably, those  
38  
39 frameworks, largely developed in higher-income settings, contain more detail regarding the CPG and  
40  
41 healthcare provider characteristics and less regarding the social, political and contextual factors. In  
42  
43 South Africa, availability of CPGs and motivation of healthcare providers and managers to support CPG  
44  
45 use are less of an issue than those of context and health systems (37).  
46  
47  
48  
49

### 50 Implications for policy and practice

51  
52 . In this study, participants made recommendations regarding structural barriers that hinder CPG  
53  
54 implementation and ultimately impact on patient care and its quality, and through these on UHC.  
55  
56  
57  
58

1  
2  
3 Participants emphasised the importance of strengthening leadership, clarifying roles and putting in place  
4 constructive accountability measures. Skilled nursing and other clinical services are required to address  
5 the health burden, along with the equipment and supplies to deliver their services as recommended by  
6 evidence-informed CPGs. Quality assurance of PHC training programmes, particularly nurses, and  
7 facilitating interdisciplinary training to ensure all staff are adhering to CPGs was suggested. Innovations,  
8 such as the DCSTs, are filling a reported gap in providing clinical mentorship, but these collaborative  
9 working groups need further strengthening. Finally, for effective CPG implementation in health services  
10 to occur, considerations of the unique settings in each province, including culture, geography and social  
11 needs, must be undertaken. Systematic use of available CPG implementation checklists to explore,  
12 understand and plan for implementation will assist to tailor strategies to address local needs, making  
13 best use of limited resources for quality healthcare (31, 34, 73).  
14  
15  
16  
17  
18  
19  
20  
21  
22  
23  
24  
25  
26  
27  
28  
29

### 30 Limitations

31  
32 Elsewhere we have discussed limitations within the broader SAGE qualitative study (37, 44). In brief,  
33 exploring CPG implementation for all PHC CPGs encompasses a very broad research area. Many PHC  
34 CPGs are available, each likely has different barriers. However, in our exploratory research, we found  
35 many cross-cutting issues such as access, training and supply chain factors. Future research can build on  
36 our findings and identify CPG-specific barriers and enablers. In particular, the thematic area on socio-  
37 cultural-geographic issues, although important, included relatively fewer findings. This requires further  
38 exploration with additional participants from various groups including patients and community leaders.  
39 To provide further specific contextual insights.  
40  
41  
42  
43  
44  
45  
46  
47  
48  
49  
50  
51

52 Another potential limitation is the sample, including provincial and district managers in four provinces,  
53 which may not sufficiently capture all views for this sub-group of the health services. Additionally, we  
54  
55  
56  
57  
58  
59  
60

1  
2  
3 used a mix of purposive and convenience sampling, resulting in inclusion of participants who were more  
4 likely to be available or responsive. Despite this, common themes emerged across provinces and reflect  
5 previous research. As this is not a static situation, research during the evolving process to UHC is  
6 necessary. Moreover, while many of the same themes emerged amongst interviewees, complete data  
7 saturation was not reached in this sub-study. Time and financial restraints prevented further data  
8 collection and additional concepts may have emerged if we had spoken to more people. Further  
9 research amongst this population would thus be potentially useful.

10  
11  
12  
13  
14  
15  
16  
17  
18  
19  
20  
21 Finally, we cannot rule out the possibility of response bias, in which participants respond according to  
22 what they believe we want to hear (55). However, many rich issues emerged from most participants..  
23 Using the individual interview approach may have provided a safe space and achieved the depth that we  
24 have been able to capture and share in this paper.

## 25 26 27 28 29 30 31 32 **Conclusion**

33  
34 CPGs are amongst the suggested policy tools to achieve evidence-informed, effective and cost-effective  
35 universal healthcare (15). Sub-national health managers reported that health-system challenges, along  
36 with socio-cultural and geographic context, are central issues hampering successful CPG  
37 implementation. Our study adds to a body of knowledge regarding evidence-informed policy  
38 implementation. Our participants provide practical insights relevant to primary care CPG  
39 implementation for lower-resourced settings aiming for UHC.

## 40 41 42 43 44 45 46 47 48 49 50 **List of abbreviations**

51  
52 CPG Clinical practice guideline

53  
54 DCST District Clinical Specialist Team



|    |     |                              |
|----|-----|------------------------------|
| 1  |     |                              |
| 2  |     |                              |
| 3  | EC  | Eastern Cape                 |
| 4  |     |                              |
| 5  | HIV | Human immunodeficiency virus |
| 6  |     |                              |
| 7  | KZN | KwaZulu-Natal                |
| 8  |     |                              |
| 9  |     |                              |
| 10 | LP  | Limpopo                      |
| 11 |     |                              |
| 12 | PHC | Primary healthcare           |
| 13 |     |                              |
| 14 | UHC | Universal health coverage    |
| 15 |     |                              |
| 16 |     |                              |
| 17 | WC  | Western Cape                 |
| 18 |     |                              |
| 19 |     |                              |
| 20 |     |                              |
| 21 |     |                              |
| 22 |     |                              |
| 23 |     |                              |
| 24 |     |                              |
| 25 |     |                              |
| 26 |     |                              |
| 27 |     |                              |
| 28 |     |                              |
| 29 |     |                              |
| 30 |     |                              |
| 31 |     |                              |
| 32 |     |                              |
| 33 |     |                              |
| 34 |     |                              |
| 35 |     |                              |
| 36 |     |                              |
| 37 |     |                              |
| 38 |     |                              |
| 39 |     |                              |
| 40 |     |                              |
| 41 |     |                              |
| 42 |     |                              |
| 43 |     |                              |
| 44 |     |                              |
| 45 |     |                              |
| 46 |     |                              |
| 47 |     |                              |
| 48 |     |                              |
| 49 |     |                              |
| 50 |     |                              |
| 51 |     |                              |
| 52 |     |                              |
| 53 |     |                              |
| 54 |     |                              |
| 55 |     |                              |
| 56 |     |                              |
| 57 |     |                              |
| 58 |     |                              |
| 59 |     |                              |
| 60 |     |                              |

## Declarations

### *Ethics approval and consent to participate*

The study was approved by the Research Ethics Committees of the South African Medical Research Council (EC002-2/2014) and Stellenbosch University (N14/02/008). The informed-consent form was sent to the individuals prior to the interviews and was also explained and confirmed at the start of interviews. All participants provided individual written informed consent. The names of participants have been captured but are saved with restricted access. We referred to the Consolidated criteria for reporting qualitative research (COREQ) to ensure comprehensive reporting (36).

### *Consent for publication*

Not applicable

### *Availability of data and material*

The datasets generated and/or analysed during the study are not publicly available as these may be linked to specific health managers interviewed and as such are not available as open-use data.

1  
2  
3 Should anyone wish to have access or is interested in further exploration of the data, you may contact  
4  
5 the author: [tamara.kredo@mrc.ac.za](mailto:tamara.kredo@mrc.ac.za).  
6  
7  
8  
9

### 10 *Competing interests*

11  
12 TK has contributed evidence to the National Department of Health Essential Drugs List Adult level  
13  
14 standard treatment guideline (non-funded); and facilitated workshops and capacity development for  
15  
16 under and post-graduate students, researchers, policymakers and practitioners on clinical practice  
17  
18 guidelines and evidence-informed practices. JV has been involved in guideline development globally and  
19  
20 regionally, he has been on advisory committees for clinical guidelines in the Western Province and has  
21  
22 facilitated workshops and capacity development for under- and postgraduate students, researchers and  
23  
24 practitioners on clinical practice guidelines and evidence-informed practices. SC, SA, AA, BS and JM have  
25  
26 no competing interests to declare.  
27  
28

29  
30 No financial competing interests to declare for any contributors to this research.  
31  
32  
33

### 34 *Funding*

35  
36 This research is supported through a grant from the Flagships Awards Project by the South African  
37  
38 Medical Research Council (SAMRC-RFA-IFSP-01-2013/ SAGE).  
39  
40  
41  
42

### 43 *Authors' contributions*

44  
45 TK drafted the protocol, with input from JV and AA, amongst others involved with the initial SAGE  
46  
47 project. TK, AA and JM were involved with data collection. TK, SA, JV, AA, JM, SC and BM contributed to  
48  
49 discussions regarding analysis of findings. TK drafted the manuscript, with input from all authors. All  
50  
51 authors approved the final version of the manuscript.  
52  
53  
54  
55  
56  
57  
58

### Acknowledgements

We would like to thank all those who participated in the research, giving us time from their management duties and helping us to understand the clinical guideline implementation landscape in South Africa. Many thanks also to several Cochrane South Africa staff and researchers who assisted with the project including Tebogo Mokganyetji, Karen Daniels, Michelle Galloway and Joy Oliver.

### References

1. World Health Organization. Declaration of Alma-Ata. Geneva: World Health Organization; 1978. Available from: [http://www.euro.who.int/\\_data/assets/pdf\\_file/0009/113877/E93944.pdf?ua=1](http://www.euro.who.int/_data/assets/pdf_file/0009/113877/E93944.pdf?ua=1).
2. World Health Organization. The World Health Report 2008: Primary Health Care: (Now More than Ever) Geneva:: World Health Organization; 2008 [Available from: <https://www.who.int/whr/2008/en/>].
3. World Health Organization and the United Nations Children's Fund (UNICEF), editor Declaration of Astana. Global Conference on Primary Health Care; 2018; Astana, Kazakhstan 2018.
4. World Health Organization and International Bank for Reconstruction and Development / The World Bank. Tracking Universal Health Coverage: 2017 Global Monitoring Report. Switzerland; 2017.
5. Department of Health SA. Strategic Plan: Department of Health 2014/2015 - 2018/2019. In: Department of Health, editor. Pretoria: Government; 2014.
6. Department of Health SA. The 10 Point Plan Medium Term Strategic Framework. In: Department of Health, editor. 2009.
7. Kautzky K, Tollman SM. A perspective on Primary Health Care in South Africa : Primary Health Care : in context. South African Health Review. 2008;2008(1):17-30.
8. Pillay-van Wyk V, Msemburi W, Laubscher R, Dorrington RE, Groenewald P, Glass T, et al. Mortality trends and differentials in South Africa from 1997 to 2012: second National Burden of Disease Study. The Lancet Global health. 2016;4(9):e642-53.
9. Mayosi BM, Lawn JE, van Niekerk A, Bradshaw D, Abdool Karim SS, Coovadia HM. Health in South Africa: changes and challenges since 2009. Lancet. 2012;380(9858):2029-43.
10. Minister of Health. National Health Insurance Bill Pretoria, South Africa 2018 [Available from: [https://www.gov.za/sites/default/files/gcis\\_document/201806/41725gon635s.pdf](https://www.gov.za/sites/default/files/gcis_document/201806/41725gon635s.pdf)].
11. Rispel L. Analysing the progress and fault lines of health sector transformation in South Africa. 2016. In: South African Health Review 2016+ [Internet]. Durban: Health Systems Trust. Available from: <http://www.hst.org.za/publications/south-african-health-review-2016>.
12. Lorenzoni L, Roubal T. International Comparison of South African Private Hospital Price Levels. 2016.
13. National Treasury. Inter-governmental Fiscal reviews - Provincial Budgets and Expenditure Review: 2010/11 - 2016/17. Pretoria: National Treasury of the Republic of South Africa; 2015.

14. Naledi T BP, Schneider H. Primary Health Care in SA since 1994 and Implications of the New Vision for PHC reengineering. In: Padarath A ER, editor. South African Health Review 2011. Durban: Health Systems Trust; 2011.
15. Department of Health SA. National Health Insurance for South Africa - towards universal health coverage (White Paper). In: Department of Health, editor. Pretoria: Government; 2015.
16. World Health Organization. WHO Handbook for guideline development 2008 January 2011; (August 2010). Available from: [http://www.searo.who.int/LinkFiles/RPC\\_Handbook\\_Guideline\\_Development.pdf](http://www.searo.who.int/LinkFiles/RPC_Handbook_Guideline_Development.pdf).
17. Institute of Medicine. Clinical Practice Guidelines We Can Trust. Graham R, Mancher M, Wolman DM, Greenfield S, Steinberg E, editors. Washington, DC: The National Academies Press; 2011. 290 p.
18. Kredt T, Bernhardsson S, Machingaidze S, Young T, Louw Q, Ochodo E, et al. Guide to clinical practice guidelines: the current state of play. *Int J Qual Health Care*. 2016;28(1):122-8.
19. Wilkinson M, Wilkinson T, Kredt T, MacQuilkan K, Mudara C, Winch A, et al. South African clinical practice guidelines: A landscape analysis. *S Afr Med J*. 2017;108(1):23-7.
20. Cullum N, Sheldon T, Watt I, West P, Wright J. Assessment of NICE guidance. *Lancet*. 2004;364(9429):136; author reply 7.
21. Spyridonidis D, Calnan M. Opening the black box: A study of the process of NICE guidelines implementation. *Health Policy*. 2011;102(2-3):117-25.
22. Runciman WB, Hunt TD, Hannaford NA, Hibbert PD, Westbrook JI, Coiera EW, et al. CareTrack: assessing the appropriateness of health care delivery in Australia. *Med J Aust*. 2012;197(2):100-5.
23. Seddon ME, Marshall MN, Campbell SM, Roland MO. Systematic review of studies of quality of clinical care in general practice in the UK, Australia and New Zealand. *Qual Health Care*. 2001;10(3):152-8.
24. Ncube NB, Solanki GC, Kredt T, Lalloo R. Antibiotic prescription patterns of South African general medical practitioners for treatment of acute bronchitis. *S Afr Med J*. 2017;107(2):119-22.
25. Mash B, Rhode H, Pather M, Ainslie G, Irusen E, Bheekie A, et al. Quality of asthma care: Western Cape province, South Africa. *S Afr Med J*. 2009;99(12):892-6.
26. Grol R. Implementing guidelines in general practice care. *Qual Health Care*. 1992;1(3):184-91.
27. Grol R, Wensing M. What drives change? Barriers to and incentives for achieving evidence-based practice. *Med J Aust*. 2004;180(6 Suppl):S57-60.
28. Grol R, Wensing M, Eccles M, Davis D. *Improving Patient Care: The Implementation of Change in Health Care*. Second Edition ed. United Kingdom: John Wiley & Sons, Ltd; 2013.
29. Grimshaw J, Thomas R, MacLennan G, Fraser C, Ramsay C. Effectiveness and efficiency of guideline dissemination and implementation strategies. *Health Technology Assessment*. 2004;8(6):84.
30. Schünemann HJ, Wiercioch W, Etzeandía I, Falavigna M, Santesso N, Mustafa R, et al. Guidelines 2.0: systematic development of a comprehensive checklist for a successful guideline enterprise. *Canadian Medical Association Journal*. 2014;186(3):E123-E42.
31. Gagliardi AR, Marshall C, Huckson S, James R, Moore V. Developing a checklist for guideline implementation planning: review and synthesis of guideline development and implementation advice. *Implementation Science*. 2015;10(1):19.
32. Gagliardi AR, Brouwers MC, Palda VA, Lemieux-Charles L, Grimshaw JM. How can we improve guideline use? A conceptual framework of implementability. *Implement Sci*. 2011;6:26.
33. Pantoja T, Opiyo N, Lewin S, Paulsen E, Ciapponi A, Wiysonge CS, et al. Implementation strategies for health systems in low-income countries: an overview of systematic reviews. *Cochrane Database Syst Rev*. 2017;9:CD011086.
34. Baker R, Camosso-Stefinovic J, Gillies C, Shaw EJ, Cheater F, Flottorp S, et al. Tailored interventions to address determinants of practice. *Cochrane Database of Systematic Reviews*. 2015(4).

- 1  
2  
3 35. Michie S, van Stralen MM, West R. The behaviour change wheel: a new method for  
4 characterising and designing behaviour change interventions. *Implement Sci.* 2011;6:42.
- 5 36. French SD, McKenzie JE, O'Connor DA, Grimshaw JM, Mortimer D, Francis JJ, et al. Evaluation of  
6 a theory-informed implementation intervention for the management of acute low back pain in general  
7 medical practice: the IMPLEMENT cluster randomised trial. *PLoS One.* 2013;8(6):e65471.
- 8 37. Kredo T, Cooper S, Abrams A, Muller J, Volmink J, Atkins S. Using the behavior change wheel to  
9 identify barriers to and potential solutions for primary care clinical guideline use in four provinces in  
10 South Africa. *BMC Health Services Research.* 2018;18(1):965.
- 11 38. Nilsen P. Making sense of implementation theories, models and frameworks. *Implement Sci.*  
12 2015;10:53.
- 13 39. Fairall L, Cornick R, Bateman E. Empowering frontline providers to deliver universal primary  
14 healthcare using the Practical and Approach to care kit. *BMJ Global Health.* 2018;3(Suppl 5):bmjgh-2018-  
15 k4451rep.
- 16 40. Chinnock P, Siegfried N, Clarke M. Is evidence-based medicine relevant to the developing world?  
17 *PLoS Med.* 2005;2(5):e107.
- 18 41. Young T, Garner P, Clarke M, Volmink J. Evidence-based health care and policy in Africa: past,  
19 present, and future. *J Clin Epidemiol.* 2016.
- 20 42. Kredo T, Machingaidze S, Louw Q, Young T, Grimmer K. South African Guideline Excellence  
21 (SAGE): What's in a name? *S Afr Med J.* 2016;106(1):18-20.
- 22 43. Kredo T, Abrams A, Young T, Louw Q, Volmink J, Daniels K. Primary care clinical practice  
23 guidelines in South Africa: qualitative study exploring perspectives of national stakeholders. *BMC Health  
24 Serv Res.* 2017;17(1):608.
- 25 44. Kredo T, Cooper S, Abrams A, Daniels K, Volmink J, Atkins S. National stakeholders' perceptions  
26 of the processes that inform the development of national clinical practice guidelines for primary  
27 healthcare in South Africa. *Health Res Policy Syst.* 2018;16(1):68.
- 28 45. Dizon JM, Grimmer K, Louw Q, Machingaidze S, Parker H, Pillen H. Barriers and enablers for the  
29 development and implementation of allied health clinical practice guidelines in South African primary  
30 healthcare settings: a qualitative study. *Health Research Policy and Systems.* 2017;15(1):79.
- 31 46. Dizon JM, Grimmer K, Machingaidze S, McLaren P, Louw Q. Mapping South African allied health  
32 primary care clinical guideline activity: establishing a stakeholder reference sample. *Health Res Policy  
33 Syst.* 2016;14(1):77.
- 34 47. Dizon JM, Grimmer KA, Machingaidze S, Louw QA, Parker H. South African primary health care  
35 allied health clinical practice guidelines: the big picture. *BMC Health Serv Res.* 2018;18(1):48.
- 36 48. Louw Q, Dizon JM, Grimmer K, McCaul M, Kredo T, Young T. Building capacity for development  
37 and implementation of clinical practice guidelines. *S Afr Med J.* 2017;107(9):745-6.
- 38 49. Statistics South Africa. Mid-year population estimates Pretoria, South Africa,  
39 <http://www.statssa.gov.za/>; 2019 2019. Contract No.: P0302.
- 40 50. The World Bank. South Africa - overview  
41 <https://www.worldbank.org/en/country/southafrica/overview2019> [  
42  
43  
44  
45  
46  
47 51. Day C, Gray, A. . Health and related indicators. In: Padarath. A B, P., editor. *South African Health  
48 Review Durban, South Africa: Health Systems Trust; 2017. p. 217-340.*
- 49 52. Department of Health SA. White Paper for the Transformation of the Health System in South  
50 Africa #17910. In: Department of Health, editor. Pretoria1997.
- 51 53. Matsoso MP, Fryatt R. National Health Insurance: the first 16 months. *S Afr Med J.*  
52 2013;103(3):156-8.
- 53 54. Department of Health. *Ideal Clinic South Africa* [Available from: <https://www.idealclinic.org.za>.  
54  
55 55. Green J, Thorogood N. *Qualitative Methods for Health Research.* Third ed. Silverman D, editor.  
56 London: SAGE; 2004.
- 57  
58  
59  
60

- 1  
2  
3 56. Graneheim UH, Lundman B. Qualitative content analysis in nursing research: concepts,  
4 procedures and measures to achieve trustworthiness. *Nurse Education Today*. 2003;24(2):105-12.
- 5 57. Saldana J. *The coding manual for qualitative researchers*. Los Angeles, CA: SAGE; 2009
- 6 58. Malterud K. *Qualitative research: standards, challenges, and guidelines*. *The*  
7 *Lancet*.358(9280):483-8.
- 8 59. Health systems evidence: Taxonomy of governance, financial and delivery arrangements and  
9 implementation strategies within health systems [Internet]. McMaster Health Forum. 2017 [cited 17  
10 February 2019]. Available from: [https://www.mcmasterforum.org/docs/default-](https://www.mcmasterforum.org/docs/default-source/resources/hse_taxonomy.pdf?sfvrsn=4)  
11 [source/resources/hse\\_taxonomy.pdf?sfvrsn=4](https://www.mcmasterforum.org/docs/default-source/resources/hse_taxonomy.pdf?sfvrsn=4).
- 12 60. World Health Organization. *Monitoring the building blocks of health systems: a handbook of*  
13 *indicators and their measurement strategies*. Geneva, Switzerland: World Health Organization; 2010.  
14 Available from: <https://www.who.int/healthinfo/systems/monitoring/en/>.
- 15 61. Herrera CA, Lewin S, Paulsen E, Ciapponi A, Opiyo N, Pantoja T, et al. Governance arrangements  
16 for health systems in low-income countries: an overview of systematic reviews. *Cochrane Database Syst*  
17 *Rev*. 2017;9:CD011085.
- 18 62. Ngidi WH, Naidoo JR, Ncama BP, Luvuno ZPB, Mashamba-Thompson TP. Mapping evidence of  
19 interventions and strategies to bridge the gap in the implementation of the prevention of mother-to-  
20 child transmission of HIV programme policy in sub-Saharan countries: A scoping review. 2017. 2017;9(1).
- 21 63. Ivers N, Jamtvedt G, Flottorp S, Young JM, Odgaard-Jensen J, French SD, et al. Audit and  
22 feedback: effects on professional practice and healthcare outcomes. *Cochrane Database Syst Rev*.  
23 2012(6):CD000259.
- 24 64. Donabedian A. The Quality of Care: How Can It Be Assessed? *JAMA*. 1988;260(12):1743-8.
- 25 65. M Campbell S, Roland M, Buetow S. *Defining Quality of Care*2001. 1611-25 p.
- 26 66. Leslie HH, Sun Z, Kruk ME. Association between infrastructure and observed quality of care in 4  
27 healthcare services: A cross-sectional study of 4,300 facilities in 8 countries. *PLOS Medicine*.  
28 2017;14(12):e1002464.
- 29 67. Dixon-Woods M, Baker R, Charles K, Dawson J, Jerzembek G, Martin G, et al. Culture and  
30 behaviour in the English National Health Service: overview of lessons from a large multimethod study.  
31 *BMJ quality & safety*. 2014;23(2):106-15.
- 32 68. Patience NTS, Sibiyana NM, Gwele NS. Evidence of application of the Basic Antenatal Care  
33 principles of good care and guidelines in pregnant women's antenatal care records. 2016. 2016;8(2).
- 34 69. World Health Organization. *Global strategy on human resources for health: workforce 2030*.  
35 Geneva, Switzerland 2016. Report No.: ISBN 978 92 4 151113 1
- 36 70. Nkosi ZZ, Asah F, Pillay P. Post-basic nursing students' access to and attitudes toward the use of  
37 information technology in practice: a descriptive analysis. *Journal of nursing management*.  
38 2011;19(7):876-82.
- 39 71. Department of Health SA. *Ideal Clinic- Components and Definition*. In: Department of Health,  
40 editor. Pretoria: Government; 2014.
- 41 72. Cobos Munoz D, Merino Amador P, Monzon Llamas L, Martinez Hernandez D, Santos Sancho JM.  
42 *Decentralization of health systems in low and middle income countries: a systematic review*. *Int J Public*  
43 *Health*. 2017;62(2):219-29.
- 44 73. Flottorp SA, Oxman AD, Krause J, Musila NR, Wensing M, Godycki-Cwirko M, et al. A checklist for  
45 identifying determinants of practice: a systematic review and synthesis of frameworks and taxonomies  
46 of factors that prevent or enable improvements in healthcare professional practice. *Implement Sci*.  
47 2013;8:35.
- 48  
49  
50  
51  
52  
53  
54  
55  
56  
57  
58  
59  
60

## Guideline implementation

### Supplementary file 1. Interview schedule for semi-structured interviews

|                                                                                                                            |                                                                                                                                          |
|----------------------------------------------------------------------------------------------------------------------------|------------------------------------------------------------------------------------------------------------------------------------------|
| 1<br>2<br>3<br>4<br>5<br>6<br>7<br>8<br>9<br>10<br>11<br>12<br>13                                                          | BACKGROUND QUESTION: what is your experience and understanding of what a guideline is or does?                                           |
| 14<br>15<br>16<br>17                                                                                                       | 1. What is your context (role, position) as it links to clinical practice guidelines?                                                    |
| 18<br>19<br>20<br>21<br>22<br>23                                                                                           | 2. What processes of primary care clinical practice guideline development, contextualisation, adapting, and implementation are in place? |
| 24<br>25<br>26<br>27                                                                                                       | 3. Who is involved/ role players?                                                                                                        |
| 28<br>29<br>30<br>31<br>32<br>33                                                                                           | 4. What works for clinical guideline development? What could be better? (if relevant to the informant)                                   |
| 34<br>35<br>36<br>37<br>38<br>39                                                                                           | 5. What works for clinical guideline implementation? What could be better? (if relevant to the informant)                                |
| 40<br>41<br>42<br>43<br>44<br>45<br>46<br>47<br>48<br>49<br>50<br>51<br>52<br>53<br>54<br>55<br>56<br>57<br>58<br>59<br>60 | 6. If we want to know more, who should we speak to?                                                                                      |



Consolidated criteria for reporting qualitative research (COREQ): a 32-item checklist for interviews and focus groups

SAGE provincial managers paper

31 October 2019

| No / Item                                      | Guide questions/description                                                                              | Section in paper                                                                                                                                                                                                                          |
|------------------------------------------------|----------------------------------------------------------------------------------------------------------|-------------------------------------------------------------------------------------------------------------------------------------------------------------------------------------------------------------------------------------------|
| <b>Domain 1: Research team and reflexivity</b> |                                                                                                          |                                                                                                                                                                                                                                           |
| <b>Personal Characteristics</b>                |                                                                                                          |                                                                                                                                                                                                                                           |
| 1. Interviewer/facilitator                     | Which author/s conducted the interview or focus group?                                                   | Details provided in methods and in previous publications. See section on 'data collection and management'                                                                                                                                 |
| 2. Credentials                                 | What were the researcher's credentials? E.g. PhD, MD                                                     | Provided in methods – not provided in detail, but provided in 'data collection and management' section of methods                                                                                                                         |
| 3. Occupation                                  | What was their occupation at the time of the study?                                                      | Outlined in methods.                                                                                                                                                                                                                      |
| 4. Gender                                      | Was the researcher male or female?                                                                       | Not mentioned in the manuscript. Interview teams were all female, and the research team included both sexes. However, given the interviews were with senior managers, the sex of the interview team was not deemed of central importance. |
| 5. Experience and training                     | What experience or training did the researcher have?                                                     | Outlined in methods – training was provided for interviewing, along with mentoring of the lead interviewer TK. Further, post interview reflection enabled learning and enhanced practice.                                                 |
| <b>Relationship with participants</b>          |                                                                                                          |                                                                                                                                                                                                                                           |
| 6. Relationship established                    | Was a relationship established prior to study commencement?                                              | In the methods section we refer to the sampling approach which was purposive, not prior relationships existed.                                                                                                                            |
| 7. Participant knowledge of the interviewer    | What did the participants know about the researcher? e.g. personal goals, reasons for doing the research | See point 6 above - no prior relationship.                                                                                                                                                                                                |
| 8. Interviewer characteristics                 | What characteristics were reported about the                                                             | The details regarding the interviewers/ researches is                                                                                                                                                                                     |



|                                          |                                                                                                                                                          |                                                                                                                                                                                                                     |
|------------------------------------------|----------------------------------------------------------------------------------------------------------------------------------------------------------|---------------------------------------------------------------------------------------------------------------------------------------------------------------------------------------------------------------------|
|                                          | interviewer/facilitator? e.g. Bias, assumptions, reasons and interests in the research topic                                                             | reported in the section on 'data collection and management'. This includes reference to their training and the interdisciplinary mix of researchers.                                                                |
| <b>Domain 2: study design</b>            |                                                                                                                                                          |                                                                                                                                                                                                                     |
| <b>Theoretical framework</b>             |                                                                                                                                                          |                                                                                                                                                                                                                     |
| 9. Methodological orientation and Theory | What methodological orientation was stated to underpin the study? e.g. grounded theory, discourse analysis, ethnography, phenomenology, content analysis | This appears in the methods section along with detailed reporting of the process.                                                                                                                                   |
| <b>Participant selection</b>             |                                                                                                                                                          |                                                                                                                                                                                                                     |
| 10. Sampling                             | How were participants selected? e.g. purposive, convenience, consecutive, snowball                                                                       | Within the methods section, we outline that both purposive sampling (for the participants role in guideline implementation) and convenience sampling (where specific people were suggested and available) was used. |
| 11. Method of approach                   | How were participants approached? e.g. face-to-face, telephone, mail, email                                                                              | Included in methods section. We describe the face to face semi-structured interviews.                                                                                                                               |
| 12. Sample size                          | How many participants were in the study?                                                                                                                 | Reported in results section in narrative and table.                                                                                                                                                                 |
| 13. Non-participation                    | How many people refused to participate or dropped out? Reasons?                                                                                          | Included in methods – there was no non-participation. All agreed to participate, none dropped out or refused.                                                                                                       |
| <b>Setting</b>                           |                                                                                                                                                          |                                                                                                                                                                                                                     |
| 14. Setting of data collection           | Where was the data collected? e.g. home, clinic, workplace                                                                                               | Provided in methods and previous publications – all interviews took place in work place, except one telephone call that was chosen for convenience for the participant.                                             |
| 15. Presence of non-participants         | Was anyone else present besides the participants and researchers?                                                                                        | Not included, as there were no non-participants, all were interviewed following informed consent.                                                                                                                   |
| 16. Description of sample                | What are the important characteristics of the sample? e.g. demographic data, date                                                                        | Relevant details provided in methods – however, only basics regarding their role,                                                                                                                                   |

|                                        |                                                                                                                                   |                                                                                                                                                                           |
|----------------------------------------|-----------------------------------------------------------------------------------------------------------------------------------|---------------------------------------------------------------------------------------------------------------------------------------------------------------------------|
|                                        |                                                                                                                                   | professional background and sex were gathered                                                                                                                             |
| <b>Data collection</b>                 |                                                                                                                                   |                                                                                                                                                                           |
| 17. Interview guide                    | Were questions, prompts, guides provided by the authors? Was it pilot tested?                                                     | Approach outlined in methods and guide provided in appendix. The semi-structured guide informed the interviews, was also adapted iteratively as the interviews proceeded. |
| 18. Repeat interviews                  | Were repeat interviews carried out? If yes, how many?                                                                             | n/a                                                                                                                                                                       |
| 19. Audio/visual recording             | Did the research use audio or visual recording to collect the data?                                                               | We used digital recordings which is described in methods section.                                                                                                         |
| 20. Field notes                        | Were field notes made during and/or after the interview or focus group?                                                           | Reported in methods - We captured some field notes, and also post-interview reflections on the data and process of the interviews.                                        |
| 21. Duration                           | What was the duration of the interviews or focus group?                                                                           | Described in methods – approximately 60 – 90 minutes                                                                                                                      |
| 22. Data saturation                    | Was data saturation discussed?                                                                                                    | This is mentioned in the discussion, under study limitations.                                                                                                             |
| 23. Transcripts returned               | Were transcripts returned to participants for comment and/or correction?                                                          | Not done                                                                                                                                                                  |
| <b>Domain 3: analysis and findings</b> |                                                                                                                                   |                                                                                                                                                                           |
| <b>Data analysis</b>                   |                                                                                                                                   |                                                                                                                                                                           |
| 24. Number of data coders              | How many data coders coded the data?                                                                                              | Details of analysis in methods – the lead researcher did the coding.                                                                                                      |
| 25. Description of the coding tree     | Did authors provide a description of the coding tree?                                                                             | Not provided here                                                                                                                                                         |
| 26. Derivation of themes               | Were themes identified in advance or derived from the data?                                                                       | Described in methods, the codes were derived from data inductively.                                                                                                       |
| 27. Software                           | What software, if applicable, was used to manage the data?                                                                        | Not used                                                                                                                                                                  |
| 28. Participant checking               | Did participants provide feedback on the findings?                                                                                | Not done                                                                                                                                                                  |
| <b>Reporting</b>                       |                                                                                                                                   |                                                                                                                                                                           |
| 29. Quotations presented               | Were participant quotations presented to illustrate the themes / findings? Was each quotation identified? e.g. participant number | Several quotations are included with an identifier to illustrate the data.                                                                                                |

|                                  |                                                                        |                                                                          |
|----------------------------------|------------------------------------------------------------------------|--------------------------------------------------------------------------|
| 30. Data and findings consistent | Was there consistency between the data presented and the findings?     | Aligned throughout the manuscript to ensure the results reflect the data |
| 31. Clarity of major themes      | Were major themes clearly presented in the findings?                   | In results - outlined major themes and categories                        |
| 32. Clarity of minor themes      | Is there a description of diverse cases or discussion of minor themes? | Results section - differing views are included.                          |

For peer review only

# BMJ Open

## 'Building on shaky ground' – challenges to and solutions for primary care guideline implementation in four provinces in South Africa: a qualitative study

|                                 |                                                                                                                                                                                                                                                                                                                                                                                                                                                                                                                                                                                                                                                                                                                                                                                                                                                                                                                                                                                                                  |
|---------------------------------|------------------------------------------------------------------------------------------------------------------------------------------------------------------------------------------------------------------------------------------------------------------------------------------------------------------------------------------------------------------------------------------------------------------------------------------------------------------------------------------------------------------------------------------------------------------------------------------------------------------------------------------------------------------------------------------------------------------------------------------------------------------------------------------------------------------------------------------------------------------------------------------------------------------------------------------------------------------------------------------------------------------|
| Journal:                        | <i>BMJ Open</i>                                                                                                                                                                                                                                                                                                                                                                                                                                                                                                                                                                                                                                                                                                                                                                                                                                                                                                                                                                                                  |
| Manuscript ID                   | bmjopen-2019-031468.R3                                                                                                                                                                                                                                                                                                                                                                                                                                                                                                                                                                                                                                                                                                                                                                                                                                                                                                                                                                                           |
| Article Type:                   | Research                                                                                                                                                                                                                                                                                                                                                                                                                                                                                                                                                                                                                                                                                                                                                                                                                                                                                                                                                                                                         |
| Date Submitted by the Author:   | 24-Mar-2020                                                                                                                                                                                                                                                                                                                                                                                                                                                                                                                                                                                                                                                                                                                                                                                                                                                                                                                                                                                                      |
| Complete List of Authors:       | Kredo, Tamara; South African Medical Research Council, Cochrane South Africa; Stellenbosch University Faculty of Medicine and Health Sciences, Department of Medicine, Division of Clinical Pharmacology<br>Cooper, Sara ; South African Medical Research Council, Cochrane South Africa; University of Cape Town Faculty of Health Sciences, School of Public Health and Family Medicine<br>Abrams, Amber; South African Medical Research Council, Cochrane South Africa<br>Muller, Jocelyn; South African Medical Research Council, Cochrane South Africa<br>Schmidt, Bey-Marrié; South African Medical Research Council, Cochrane South Africa<br>Volmink, Jimmy; South African Medical Research Council, Cochrane South Africa; Stellenbosch University Faculty of Medicine and Health Sciences, Deans office and Centre for Evidence Based Health Care<br>Atkins, Salla; Tampere University, New Social Research and Faculty of Social Sciences; Karolinska Institute, Department of Public Health Sciences |
| <b>Primary Subject Heading</b>: | Global health                                                                                                                                                                                                                                                                                                                                                                                                                                                                                                                                                                                                                                                                                                                                                                                                                                                                                                                                                                                                    |
| Secondary Subject Heading:      | Evidence based practice, General practice / Family practice, Health services research, Qualitative research                                                                                                                                                                                                                                                                                                                                                                                                                                                                                                                                                                                                                                                                                                                                                                                                                                                                                                      |
| Keywords:                       | Health policy < HEALTH SERVICES ADMINISTRATION & MANAGEMENT, Protocols & guidelines < HEALTH SERVICES ADMINISTRATION & MANAGEMENT, PRIMARY CARE, QUALITATIVE RESEARCH, Quality in health care < HEALTH SERVICES ADMINISTRATION & MANAGEMENT, PUBLIC HEALTH                                                                                                                                                                                                                                                                                                                                                                                                                                                                                                                                                                                                                                                                                                                                                       |
|                                 |                                                                                                                                                                                                                                                                                                                                                                                                                                                                                                                                                                                                                                                                                                                                                                                                                                                                                                                                                                                                                  |

SCHOLARONE™  
Manuscripts



I, the Submitting Author has the right to grant and does grant on behalf of all authors of the Work (as defined in the below author licence), an exclusive licence and/or a non-exclusive licence for contributions from authors who are: i) UK Crown employees; ii) where BMJ has agreed a CC-BY licence shall apply, and/or iii) in accordance with the terms applicable for US Federal Government officers or employees acting as part of their official duties; on a worldwide, perpetual, irrevocable, royalty-free basis to BMJ Publishing Group Ltd ("BMJ") its licensees and where the relevant Journal is co-owned by BMJ to the co-owners of the Journal, to publish the Work in this journal and any other BMJ products and to exploit all rights, as set out in our [licence](#).

The Submitting Author accepts and understands that any supply made under these terms is made by BMJ to the Submitting Author unless you are acting as an employee on behalf of your employer or a postgraduate student of an affiliated institution which is paying any applicable article publishing charge ("APC") for Open Access articles. Where the Submitting Author wishes to make the Work available on an Open Access basis (and intends to pay the relevant APC), the terms of reuse of such Open Access shall be governed by a Creative Commons licence – details of these licences and which [Creative Commons](#) licence will apply to this Work are set out in our licence referred to above.

Other than as permitted in any relevant BMJ Author's Self Archiving Policies, I confirm this Work has not been accepted for publication elsewhere, is not being considered for publication elsewhere and does not duplicate material already published. I confirm all authors consent to publication of this Work and authorise the granting of this licence.

1  
2  
3 **'Building on shaky ground' – challenges to and solutions for primary care guideline implementation in**  
4  
5 **four provinces in South Africa: a qualitative study**  
6

7 Tamara Kredo<sup>1,2</sup>, Sara Cooper<sup>1,3</sup>, Amber Abrams<sup>1</sup>, Jocelyn Muller<sup>1</sup>, Bey-Marrié Schmidt<sup>1</sup>, Jimmy Volmink<sup>6</sup>,  
8  
9 Salla Atkins<sup>7,8</sup>  
10  
11  
12  
13

14 <sup>1</sup> Cochrane South Africa, South African Medical Research Council  
15

16 <sup>2</sup> Division of Clinical Pharmacology, Faculty of Medicine and Health Sciences, Stellenbosch University  
17

18 <sup>3</sup> Division of Social & Behavioural Sciences, School of Public Health and Family Medicine, University of  
19  
20  
21 Cape Town  
22

23 <sup>6</sup> Dean's office and Centre for Evidence Based Health Care, Faculty of Medicine and Health Sciences,  
24  
25 Stellenbosch University  
26

27 <sup>7</sup> Department of Public Health Sciences, Karolinska Institutet, Tomtebodavägen 18A, 17177, Stockholm  
28

29 <sup>8</sup> New Social Research and Faculty of Social Sciences, Tampere University, PO Box 100, Tampere, Finland  
30

31  
32 Corresponding author: Tamara Kredo [tamara.kredo@mrc.ac.za](mailto:tamara.kredo@mrc.ac.za)  
33

34 Emails: Sara Cooper: [sara.cooper@mrc.ac.za](mailto:sara.cooper@mrc.ac.za); Amber Abrams: [amberabrams@gmail.com](mailto:amberabrams@gmail.com); Jocelyn  
35

36  
37 Muller: [jocelyn.muller@gmail.com](mailto:jocelyn.muller@gmail.com); Bey-Marrie Schmidt: [bey-marrie.schmidt@mrc.ac.za](mailto:bey-marrie.schmidt@mrc.ac.za); Jimmy  
38

39 Volmink: [jvolmink@sun.ac.za](mailto:jvolmink@sun.ac.za); Salla Atkins: [salla.atkins@tuni.fi](mailto:salla.atkins@tuni.fi)  
40  
41  
42  
43  
44  
45  
46  
47  
48  
49  
50  
51  
52  
53  
54  
55  
56  
57  
58  
59  
60

**Abstract****Objectives:**

Clinical guidelines support evidence-informed quality patient care. Our study explored perspectives of South African sub-national health managers regarding barriers to and enablers for implementation for all available primary care guidelines.

**Design:**

We used qualitative research methods, including semi-structured, individual interviews and an interpretative perspective. Thematic content analysis was used to develop data categories and themes.

**Setting:**

We conducted research in four of nine South African provinces with diverse geographic, economic and health-system arrangements (Eastern Cape, Western Cape, KwaZulu-Natal, Limpopo). South Africa is a middle-income country with high levels of inequality. The settings represented public-sector rural and peri-urban health facilities.

**Participants:**

Twenty-two participants with provincial and district health management roles, that comprised implementation and/or training on primary care guidelines, were included.

**Results:**

Participants recommended urgent consideration of health-system challenges, particularly financial constraints, impacting on access to the guidelines themselves and to medical equipment and supplies necessary to adhere to guidelines. They suggested that overcoming service-delivery gaps requires strengthening of leadership; clarification of roles; and, enhanced accountability. Participants suggested that inadequate numbers of skilled clinical staff hampered guideline use and, ultimately, patient care. Quality assurance of training programmes for clinicians, particularly nurses; interdisciplinary training; and, strengthening post-training mentorship were recommended. Furthermore, fit-for-purpose

1  
2  
3 guideline implementation necessitates considering the unique settings of facilities, including local  
4  
5 culture and geography. This requires guideline development to include guideline end-users.  
6

## 7 **Conclusions**

8  
9  
10 Guidelines are one of the policy tools to achieve evidence-informed, cost-effective and universal  
11  
12 healthcare. But, if not effectively implemented, they have no impact. Sub-national health managers in  
13  
14 poorly resourced settings suggested that shortcomings in the health system, along with poor  
15  
16 consultation with end-users, affects implementation. Short-term improvements are possible through  
17  
18 increasing access to and training on guidelines. However, health-system strengthening and recognition  
19  
20 of socio-cultural-geographic diversity, are prerequisites for context-appropriate evidence-informed  
21  
22 practice.  
23  
24  
25  
26  
27  
28  
29

30 **Key words:** qualitative research, clinical practice guidelines, implementation, primary care, quality of  
31  
32 care, health-systems research, health-services research, policy implementation, quality improvement  
33  
34  
35  
36

### 37 **Strengths and limitations of this study**

- 38  
39 • The qualitative research methods used enabled us to explore in-depth perspectives of those  
40  
41 involved with guideline implementation regarding what is working and what can be improved in a  
42  
43 lower-income setting with high levels of inequality.
- 44  
45 • We report interviews with provincial and district health managers in four culturally and  
46  
47 geographically diverse South African provinces, that are likely to reflect settings in other low- and  
48  
49 middle income countries. There are many primary care guidelines available in South Africa with  
50  
51  
52



1  
2  
3  
4  
5  
6  
7  
8  
9  
10  
11  
12  
13  
14  
15  
16  
17  
18  
19  
20  
21  
22  
23  
24  
25  
26  
27  
28  
29  
30  
31  
32  
33  
34  
35  
36  
37  
38  
39  
40  
41  
42  
43  
44  
45  
46  
47  
48  
49  
50  
51  
52  
53  
54  
55  
56  
57  
58  
59  
60

different target users, further interviews may elucidate specific barriers to and enablers of guideline implementation.

- This health systems research addressed a knowledge gap important for effective guideline implementation.

For peer review only

## Background

Primary healthcare, often the first point of contact for people within a public health system, aims to provide comprehensive, accessible, quality, cost-effective care throughout a person's life (1, 2). A functioning primary healthcare system is considered indicative of a strong health system and a necessary precursor to achieving Universal Health Coverage (UHC) (2, 3). Despite clear goals and many multinational agreements over several decades, a 2017 World Bank and World Health Organization (WHO) report measuring UHC success stated that at least half of the global population does not yet access high quality basic health services (3).

Like many low- and middle-income countries, South Africa has committed to enhancing and improving the quality of primary care for UHC (4, 5). However, despite the political will indicated by the White Paper for a National Health Insurance Scheme to fund UHC, the investment thus far has not been sufficient to overcome the challenges posed by colliding communicable and non-communicable epidemics alongside recognised health-system deficiencies (6-8). Health outcomes remain poor relative to other middle-income countries with similar health spend; and health care remains inequitably distributed within a two-tiered public and private system where 40% of the health budget is consumed by the private sector, despite serving only 17% of the population (9, 10). Several strategic initiatives aim to address these deficiencies, including PHC re-engineering, with an emphasis on strengthening district health managers; and advancing policy planning for National Health Insurance (7, 11). These initiatives place importance on clinical governance, with clinical practice guidelines (CPGs) as one named strategy for health care strengthening.

CPGs are recognised tools for health-policy implementation and quality improvement (12, 13). Evidence-informed CPGs aim to recommend effective prevention, diagnostic and treatment interventions, while minimising harm, within the limits of what a health system can afford. Well conducted guidelines

1  
2  
3 provide evidence-informed recommendations to guideline patient care (13).. In South Africa, at least  
4  
5 175 CPGs have been developed since 2012, largely for the management of non-communicable diseases  
6  
7 and mostly by the Department of Health (14). While the number of CPGs available is substantial, they  
8  
9 provide no benefit if inadequately implemented. Studies in South Africa and elsewhere have found  
10  
11 potential implementation gaps where, despite the availability of CPGs, clinical care does not meet  
12  
13 required standards (15-18).  
14  
15

16  
17  
18 Evidence-to-practice gaps pose a substantial challenge in all healthcare settings and how best to  
19  
20 overcome them has been a longstanding debate (19, 20). There are checklists available that outline  
21  
22 potential approaches for best-practice CPG implementation (21-23). However, which strategies work,  
23  
24 under which conditions, remains a complex and evolving research field. Generally, tailored, multifaceted  
25  
26 interventions addressing specific barriers are better, but the benefit to health or process outcomes is  
27  
28 often modest at best and difficult to extrapolate to different contexts (20, 24, 25). Increasingly, theory-  
29  
30 informed approaches are used to design the complex interventions required to change behaviour, yet  
31  
32 the cost of doing this relative to the benefit remains unclear (26, 27). In South Africa, several trials  
33  
34 evaluating evidence-informed approaches for CPG implementation find a small, but consistent benefit  
35  
36 from targeted strategies, yet, roll-out of these context-specific strategies remains a gap (28).  
37  
38  
39  
40  
41  
42

43 Given the limited resources allocated to health, particularly in low- and middle-income settings such as  
44  
45 South Africa, knowing how best to intervene efficiently and effectively, resulting in best quality care, is  
46  
47 paramount (29). In this context, exploring the views of those involved with CPGs is a reasonable way to  
48  
49 learn about local needs. The South African Guidelines Excellence (SAGE) project aimed to understand  
50  
51 primary care CPG development, implementation and capacity needs. For the qualitative component of  
52  
53 SAGE, we interviewed diverse role players involved in primary care CPG development, implementation  
54  
55  
56  
57  
58  
59

1  
2  
3 and/or use. We have reported the findings from national CPG developers (30, 31); frontline healthcare  
4 workers who use CPGs (32); as well as allied healthcare providers regarding CPG development and  
5 implementation (33-36). In this paper, we build on this work but delve further into the area of health  
6 system and service governance to explore the perspectives of provincial and district health managers  
7 who have responsibility for CPG implementation. We aimed to explore the perspectives of these  
8 provincial and district managers regarding barriers to and enablers for primary care CPG implementation  
9 in four provinces in South Africa  
10  
11  
12  
13  
14  
15  
16  
17  
18  
19  
20

## 21 **Methods**

### 22 *Design*

23 We used qualitative methods from an interpretative paradigm to understand the experiences and  
24 perspectives of provincial and district managers responsible for primary care guideline implementation.  
25 The methods and study context have been described in detail elsewhere (32), and thus only a summary  
26 is provided here, together with a detailed description of the participants and analysis methods used.  
27  
28  
29  
30  
31  
32  
33  
34  
35  
36

### 37 *Study settings*

38 South Africa is an upper middle-income country with a population of 58.8 million in 2019 (37); however,  
39 its population faces amongst the highest rates of inequality globally (38). Over several decades, the  
40 national government has increased emphasis on PHC services managed through 44 district offices across  
41 nine provinces, ranging from two to 10 districts in each province (7, 37, 39, 40). Districts are  
42 administrative sub-sections of the province, usually run as part of local government. Legislation has  
43 recently been introduced that supports the implementation of UHC, through a National Health  
44 Insurance system (41). In general, national government develops health strategies and CPGs; and  
45 provincial governments implement them through regional, district, or community healthcare facilities  
46  
47  
48  
49  
50  
51  
52  
53  
54  
55  
56  
57  
58  
59  
60

1  
2  
3 and their providers (9). Primary care providers include nurses, doctors, nutritionists, physiotherapists,  
4 dentists, occupational therapists and social workers. However, primary care clinics are largely nurse-run,  
5 with access to the additional providers intermittently or at larger district facilities. There are several  
6 primary care guidelines endorsed by the national government for public-sector use. These include  
7 condition-specific guidelines (e.g. basic antenatal care, human immune deficiency virus (HIV) and  
8 tuberculosis) or integrated guidelines (e.g. Essential Medicines list, Adult Primary Care, Integrated  
9 Management of Childhood Illness) (42). Several programmes to strengthen district clinical governance  
10 have been introduced and are linked to CPG implementation: 1) The Ideal Clinic, defined as a "clinic with  
11 good infrastructure, adequate staff, adequate medicine and supplies, good administrative processes,  
12 and sufficient adequate bulk supplies", includes ensuring access to and use of CPGs (42); and, 2)  
13 'primary health care re-engineering' which aims to strengthen district healthcare management through  
14 community health workers; school health programmes; and District Clinical Specialist Teams (DCSTs)  
15 (11). DCSTs include: a family physician, primary healthcare nurse, obstetrician, advanced midwife,  
16 paediatrician, paediatric nurse and anaesthetist. The family physician and primary health care nurse are  
17 central to primary care CPG implementation through their clinical governance role, including ensuring  
18 the provision of training and mentorship to implement nationally endorsed CPGs. They have limited  
19 clinical roles, but rather take on management and supervision roles for the facilities they support.

20  
21  
22  
23  
24  
25  
26  
27  
28  
29  
30  
31  
32  
33  
34  
35  
36  
37  
38  
39  
40  
41 As outlined in the introduction, this is a sub-study of the larger SAGE Project that interviewed a range of  
42 role players in primary care guideline development, implementation and use in South Africa. In this sub-  
43 study, we explore the views of provincial and district health managers responsible for guideline  
44 implementation. This includes provincial managers with oversight of programmes such as Primary Care  
45 an district managers with strictly management roles and those with clinical governance and  
46 support/training roles (e.g. members of the District Specialist Clinical Teams) or those responsible for  
47 training. All participants we interviewed have roles in primary care CPG implementation.

### *Sampling and recruitment*

Sampling took place in four of the nine provinces in South Africa - Western Cape (WC), KwaZulu-Natal (KZN), Eastern Cape (EC) and Limpopo (LP)- chosen for their socio-economic , geographical and cultural diversity. (32, 39). Within each province, we aimed to interview 20 participants from the about provincial office and from two district offices in person at their place of work or a preferred venue. We obtained approval from Provincial Research Units prior to conducting interviews. In the Eastern Cape we were invited to present at a provincial research day, where we received buy-in for our planned research (32). In the Western Cape we contacted known provincial managers involved with PHC CPGs. In the other provinces, we invited individuals recommended by the Provincial Research Units. Hence sampling was both purposive, as we sought to include individuals with specific experience in PHC CPG implementation; and, through convenience, when specific individuals, meeting our criteria, were recommended and available to be interviewed. Once access was negotiated, all those invited agreed to participate.

### *Data collection and management*

Individual interviews were considered most appropriate to provide in-depth insights into people's lived experiences (43). We used a semi-structured interview guide (Supplementary file 1), asking about experiences of CPG adaptation and implementation processes, and about potential barriers to and enablers of successful implementation. The guide was adapted iteratively, drawing on insights from previous interviews and included open-ended questions to allow participants to direct the emphasis of the interview (43). Interviewers received training in interviewing and two interviewers were present at all interviews. TK, a medical doctor with qualitative interview training, led most of the interviews,

1  
2  
3 accompanied by AA, JM or other research team members. Interviews were conducted in English and  
4  
5 lasted 60 – 90 minutes. There were no requests for translation despite the various first languages spoken  
6  
7 in the provinces. All interviews were individual, with two exceptions in which colleagues joined the  
8  
9 interview at the request of the invited participant. One interview took place telephonically at their  
10  
11 request due to challenges with scheduling.  
12  
13

14  
15  
16  
17 All interviews were recorded. After each interview, reflections and summaries were written to capture  
18  
19 initial insights and identify points for further exploration in subsequent interviews. Interviews were  
20  
21 transcribed verbatim, and reviewed for accuracy (TK, TM). Data were stored electronically on password-  
22  
23 protected computers; and consent forms stored in a locked cabinet.  
24  
25  
26  
27

### 28 *Analysis*

29  
30 We used an iterative, thematic content analysis approach (43, 44). Three researchers read initial  
31  
32 transcripts (TK, AA, SA) and agreed on the general meaning and main issues presented. One researcher  
33  
34 (TK) then re-read transcripts, performing open coding to explore barriers to and enablers of CPG  
35  
36 implementation, extracting the relevant quotes/coding units. TK then used the quotes to explore the  
37  
38 topics raised, unpack the meanings of statements made, while categorising the arising themes (45).  
39  
40 Categories and their related quotes were further examined (TK, SC, BS, SA) to identify meaningful  
41  
42 themes (46). Following this, results were discussed with SA to develop the analysis further and then  
43  
44 presented to all authors for input and verification prior to finalisation. The research team was  
45  
46 interdisciplinary including public health, medical doctors, and social scientists enabling various views to  
47  
48 enrich the interpretation.  
49  
50  
51  
52

### 53 *Trustworthiness*

1  
2  
3  
4  
5  
6  
7  
8  
9  
10  
11  
12  
13  
14  
15  
16  
17  
18  
19  
20  
21  
22  
23  
24  
25  
26  
27  
28  
29  
30  
31  
32  
33  
34  
35  
36  
37  
38  
39  
40  
41  
42  
43  
44  
45  
46  
47  
48  
49  
50  
51  
52  
53  
54  
55  
56  
57  
58  
59  
60

Several measures were undertaken to ensure that the research process was trustworthy, authentic and dependable in order that the findings would be a credible reflection of reality. Detailed capturing and rich description of our approaches, including that of sampling, data collection, data management, and analysis, were conducted to enhance the dependability of our findings (46). Quotations were included to provide readers the opportunity to interpret data, establish confirmability and to show data richness. Complementary research competencies and experiences of the multidisciplinary team of researchers (social science, medical practice, CPG development and implementation) influenced data interpretation and strengthened study rigour. Transferability to a broader readership was demonstrated through information about the sample, setting and provision of a sufficiently detailed report to consider relevance to others. Reflexivity and the researchers' positionings were considered throughout the process of data collection and analysis, thus enhancing the confirmability of the findings.

### *Patient and Public Involvement*

CPGs are tools that aim to directly impact patient care and guide clinician-patient engagement. In South Africa, there is little research evidence regarding patients' views about CPGs. The research question was developed with patients in mind, but we were seeking perspectives of provincial and district health managers in primary care, and neither patients nor the public were included. The results of the research will be shared with the participants.

### **Results**

Twenty semi-structured interviews were held from September 2015 to August 2016 (Table 1). Two interviews included more than one individual, at the request of the invited participant, and as such there



1  
2  
3 were 22 included participants. Participants had previously worked in clinical positions as nurses (n = 15),  
4  
5 or doctors (n = 7), but were currently occupying management positions. These provincial and district  
6  
7 managers were responsible for health-service delivery and worked in PHC generally or within specific  
8  
9 clinical programmes (e.g. HIV, non-communicable diseases), or in operational roles. Our final sample  
10  
11 included provincial managers representing four provinces; district managers from two districts in each  
12  
13 of the four provinces. District Clinical Specialists were included in in Limpopo, KZN and Eastern Cape,  
14  
15 however, the Western Cape has not implemented the DCST programme.  
16  
17  
18  
19  
20  
21

22 **Table 1. Description of the research participants**  
23  
24

|                                                                                                                                                                                                                      |                                                |                      |                |                     |                     |
|----------------------------------------------------------------------------------------------------------------------------------------------------------------------------------------------------------------------|------------------------------------------------|----------------------|----------------|---------------------|---------------------|
| 25<br>26<br>27<br>28<br>29<br>30<br>31<br>32<br>33<br>34<br>35<br>36<br>37<br>38<br>39<br>40<br>41<br>42<br>43<br>44<br>45<br>46<br>47<br>48<br>49<br>50<br>51<br>52<br>53<br>54<br>55<br>56<br>57<br>58<br>59<br>60 | Total 20<br>interviews with 22<br>participants | <i>KwaZulu-Natal</i> | <i>Limpopo</i> | <i>Eastern Cape</i> | <i>Western Cape</i> |
|                                                                                                                                                                                                                      | Total interviewed                              | 4                    | 5              | 7                   | 6                   |
|                                                                                                                                                                                                                      | Provincial office                              | 1                    | 2              | 3                   | 5                   |
|                                                                                                                                                                                                                      | District office                                | 3                    | 3              | 4                   | 1                   |

Most participants considered CPGs credible sources to guide clinical practice and, importantly, believed that CPGs impact positively on patients' health. Some participants described that CPGs can 'save a life'. District managers with a medical background particularly shared views regarding the value of CPGs, stating that they are 'evidence-based and it works... mortality goes down when we do things properly'.

1  
2  
3 Further sentiments supporting CPGs included *'harmonisation of practice'*, *'quality improvement'*, and  
4  
5 *'rational'* medicine use.  
6  
7

8 Despite widespread belief in the credibility and positive impact of CPGs, participants felt that CPG  
9  
10 implementation is currently inadequate and described the multiple challenges they face in this regard.  
11

12 We have organised these into two main themes namely: 1) health-system factors and, 2) socio-cultural  
13  
14 contextual issues.  
15  
16

### 17 18 19 Health-system factors 20 21 22

23 Provincial managers experienced CPG implementation as challenging, under-resourced, and sometimes  
24  
25 insufficiently planned. They suggested that CPGs were not the issue, but rather that the capacity of the  
26  
27 health systems to support implementation posed the greatest challenge. A provincial manager who had  
28  
29 worked in several provinces explained: *'training and the guidelines are fine, but the bed rock on which*  
30  
31 *we are building is not – we are building on shaky ground'* (Provincial manager, WC).  
32  
33  
34

### 35 36 Financial constraints 37 38

39 Financial constraints were recurring issues across provinces. Frustration was expressed by some that  
40  
41 funding across different conditions was inequitable, with more funding for HIV and tuberculosis, *'but the*  
42  
43 *other big killers'* such as non-communicable diseases received little or *'no support'*. This situation was  
44  
45 often driven by international donor funding, which influenced which CPGs were prioritised for  
46  
47 implementation.  
48  
49

50  
51 Access to the right tools and equipment was perceived as a prerequisite for successful CPG  
52  
53 implementation. However, all participants spoke about budgetary constraints, and a resulting lack of, or  
54  
55  
56  
57  
58

1  
2  
3 poorly serviced, clinic equipment and stocks with the associated impact on CPG implementation. A PHC  
4  
5 district manager stated:

6  
7  
8 *'Budgetary constraints are still a challenge, the systems are still a challenge, they are hindering the*  
9  
10 *implementation of these guidelines. For you to get a blood-pressure machine, you have to wait for*  
11  
12 *more than two months. If this scale is broken, you should follow a tender process for that scale to*  
13  
14 *be repaired, so the systems are killing the implementation of guidelines also, the procurement and*  
15  
16 *supply-chain systems'* (District manager, EC).  
17  
18

19  
20  
21 Furthermore, the simple issue of limited access to CPG copies on site, due to budgetary constraints, was  
22  
23 highlighted as an additional barrier for using CPGs. As reflected on by a district manager in rural Eastern  
24  
25 Cape *'I mean you are just lucky if you get them'*.

26  
27  
28 Several district managers also mentioned that *'the challenge is about printing the guidelines'* due to  
29  
30 budget allocations from national government. Solutions were offered to overcome both the poor quality  
31  
32 of, and poor access to, CPG copies. A dominant view was that digital access would mitigate these issues  
33  
34 and increase *'click and check'* CPG access. Several managers suggested, however, that both the printed  
35  
36 and digital versions are needed; for example, one rural district manager said: *'They [older healthcare*  
37  
38 *providers] like the booklet, but the young ones like the app'* (Provincial manager, LP).  
39  
40

41  
42  
43 Despite many participants highlighting the potential value of increasing digital CPG access, financial  
44  
45 barriers were expressed in all provinces, as one manager suggested *'no computers, no internet, there's*  
46  
47 *no connection'* (District manager, KZN). This was repeated by others: *'I don't think you will find a single*  
48  
49 *computer that's got any connection to anything'* (District manager, KZN).  
50  
51

1  
2  
3 In addition, a district manager in an urban context explained the dilemma of investing in digital solutions  
4  
5 in the face of limited funding. She asked: *'Do you want to buy more computers, or do you want more*  
6  
7 *medication?'* (District manager, WC).  
8  
9

## 10 **Governance and leadership**

11  
12  
13  
14 Senior managers explained that effective CPG implementation required strong governance including  
15  
16 clarity regarding responsibility, and how implementation should be delivered and monitored. *'...it's an*  
17  
18 *issue of governance, how is implementation of guidelines governed and whose responsibility is it and do*  
19  
20 *we have enough capacity to manage governance'* (Provincial manager 2, WC).  
21  
22  
23

24 District management was perceived as demotivated because the volume of policies requiring  
25  
26 implementation left them feeling *'completely bombarded and confused'*. In addition, lack of support for  
27  
28 implementation, or in some circumstances the punitive approach taken towards managers struggling  
29  
30 with implementation within very challenging health systems, was perceived as demoralizing. A senior  
31  
32 manager, having worked in several provinces with differing infrastructure, described his experience:  
33  
34

35  
36 *'There are good people at ground level, but without a level of protection and support they kind*  
37  
38 *of just get nailed. So every new policy is looked upon with dread because you are worried that*  
39  
40 *at some point somebody is going to come and say you are not implementing it'* (Provincial  
41  
42 manager, WC).  
43  
44  
45

46 Managers offered various solutions, explaining that it was not only the remit of public servants to lead  
47  
48 CPG implementation. Community champions and leaders were suggested as additional enablers of CPG  
49  
50 implementation. Within the health workforce, this included senior academics who inspired junior staff;  
51  
52 while in the community it was community leaders, including traditional chiefs or religious leaders who  
53  
54 endorsed local facilities and encouraged patients to follow guidance.  
55  
56  
57  
58  
59

1  
2  
3 Further recommendations to support governance included developing relationships with non-  
4 governmental organisations (NGOs), known as 'partners'. Given the limited provincial budgets, partners  
5 were often perceived as the only means for providing training or developing materials for CPG  
6 dissemination. Partners were mentioned, particularly in the Eastern Cape, both at the provincial and  
7 district level, as one district manager explained '*when the guideline is out, we need to call them [NGO  
8 partners] to be part of us*'. However, this also raised the issue of sustainability as there was a risk that  
9 when NGO funding ended, services would be withdrawn, and local government lacked capacity to  
10 maintain the activities, potentially undermining care.  
11  
12  
13  
14  
15  
16  
17  
18  
19  
20  
21

### 22 **Accountability approaches**

23  
24  
25 Several managers suggested accountability mechanisms to enhance implementation. For example,  
26 audits and feedback to measure CPG use was an accountability and quality-improvement approach cited  
27 by various participants. This approach was reportedly functioning better in certain provinces. A  
28 provincial manager in the Western Cape described a constructive experience:  
29  
30  
31  
32  
33  
34

35 *'(Based on the) situational analysis and audits ... we pick up the gaps in quality and we start*  
36 *looking at what is our opportunity to, either tweak a guideline, develop a guideline or a tool or*  
37 *piece of stationary or an algorithm or flow chart that will close that gap'* (Provincial manager,  
38 WC).  
39  
40  
41  
42  
43  
44

45 While accountability mechanisms were perceived by some as essential, most managers, on the contrary,  
46 described audits as punitive and obstructive, with potential negative consequences. This statement by  
47 one provincial manager is indicative of many similar statements by others: '*then comes the monitoring*  
48 *and evaluation people to monitor that thing, not in a nurturing way, but in a "why didn't you hit your*  
49 *targets kind of way"*' (Provincial manager, WC). This concept of punitive audits emerged from several  
50  
51  
52  
53  
54  
55  
56  
57  
58  
59  
60

1  
2  
3 provinces. One senior manager spoke about a *'compliance culture'* in which focus was directed primarily  
4  
5 to what is measurable, such as structural inputs like infrastructure, and the blame that ensues if these  
6  
7 targets are unmet.  
8  
9

10  
11 *'... when it comes to focusing on clinical guidelines if no one is auditing that in the same way. So,*  
12  
13 *the Auditor General is this big bogey man out there. If anything goes wrong, then, of course, the*  
14  
15 *province gets into big trouble. So, there is a lot more gravitas or seriousness attached when the*  
16  
17 *Auditor General says something...'* (Provincial manager, WC).  
18  
19

20  
21 Another participant from the Eastern Cape provided an analogous account:  
22  
23

24 *'We will comply and complain later, if there is a time to complain. But what is emphasised, is*  
25  
26 *compliance. There is that strict compliance. Compliance. If you don't comply, it means you are*  
27  
28 *failing your district, or your sub-district, or your clinic or your people. There is no time for*  
29  
30 *complaining or reflecting, it is compliance'* (District manager, EC).  
31  
32  
33

34 The compliance culture and aversion to punitive action was thought to have negative effects on CPG  
35  
36 implementation and patient care. Participants indicated how the compliance and audit systems *'just*  
37  
38 *adds to the frustration', 'distracts'* from the focus on clinical care and ultimately results in rushing ahead  
39  
40 to meet targets, or as one manager put it: *'running around like a headless chicken'* (District manager,  
41  
42 EC).  
43  
44  
45

#### 46 **Human resource constraints**

47  
48

49 Health workforce constraints were emphasised as pertinent to CPG implementation. Managers  
50  
51 described the mismatch between the growing workload and unchanging staff numbers:  
52  
53  
54  
55  
56  
57  
58

1  
2  
3 *'we have this burden of disease that is growing. We have resources that are shrinking. So more*  
4 *of our health workers are being asked to do more with less resources'* (Provincial manager, WC).

5  
6  
7  
8  
9 Health workforce barriers to CPG use were described as three-fold: staff shortages, insufficient time,  
10 and inappropriately qualified staff unable to fulfill required tasks. These issues resulted in staff being  
11 *'overstretched'* and *'not coping'*. It was suggested that staff experience considerable time pressures due  
12 to their heavy workloads, *'continuously dealing with patients'* as well as pressure from patients wanting  
13 them to work *'fast, fast, fast'*. As one provincial manager lamented:  
14  
15  
16  
17  
18

19  
20  
21 *'...they [nurses] have no time to look at guidelines, they have no time to do quality work to check*  
22 *the quality issues because they are continuously dealing with patients'* (Provincial manager, LP).

### 23 24 25 26 **Capacity gaps and opportunities**

27  
28 Linked with human resources is capacity building. Training was emphasised as the primary means by  
29 which CPGs are implemented. Participants generally agreed that to support implementation *'you can't*  
30 *just automatically know how to do things, you need to be trained'*. Therefore, building skills and  
31 knowledge was understood as a prerequisite to changing practice.  
32  
33  
34  
35  
36  
37

#### 38 39 *Primary care nurse training gaps*

40  
41 An issue raised mostly by nurse managers was the poor state of professional training of PHC nurses.  
42 Nurses were described as *'not skilled'* and the nurse training syllabuses *'outdated'*, raising concerns that  
43 nurses entering practice were inadequately prepared. In the most extreme example, a provincial  
44 manager suggested that *'student nurses come out blank... they are the ones that are causing all these*  
45 *deaths'*.  
46  
47  
48  
49  
50  
51  
52  
53  
54  
55  
56  
57  
58  
59  
60

1  
2  
3 Several suggestions were made for optimising training and support through: 1) training delivery  
4 approaches; and, 2) post-training clinical support.  
5  
6

### 7 8 *Considerations during training* 9

10 Regarding training itself, access to workshops and ensuring adequate coverage of staff was identified as  
11 a significant challenge. Various participants indicated that *'onsite training is the best one'*, as when  
12 training was delivered off-site, fewer staff could attend, and disseminating learning when back at  
13 facilities was ineffective: *'they [the nurses] don't cascade the information'*. However, *'lack of time'* and  
14 *'budgetary constraints'* to provide training in every facility was their reality. Therefore, finding  
15 contextually appropriate training approaches were suggested, such as *'training local people to be*  
16 *trainers'* and working with NGOs that have more training resources. Furthermore, ensuring that DCSTs  
17 are maximally used to provide training was considered key. As a district manager in Limpopo suggested:  
18  
19  
20  
21  
22  
23  
24  
25  
26  
27  
28  
29

30 *'DCST staff are now doing the training per facility, no more calling people to a centralised place...*  
31 *and also [doing] the support visit in the facility'* (District manager, LP).  
32  
33  
34

35 Several participants recommended that training should be interactive, not didactic. Many commended  
36 the practical skills training, so-called *'fire drills'*, used for maternal health training. This training requires  
37 staff to demonstrate a response to an emergency during the training, but also subsequently on-site at  
38 unexpected intervals.  
39  
40  
41  
42  
43  
44

45 Despite many challenges identified regarding nurse training, nurses were still considered to have better  
46 access to training than doctors, resulting in outdated practices by doctors. It was reported that doctors  
47 are excluded from training. Participants recommended that training should be interdisciplinary, bringing  
48 all clinical disciplines onto the same level. As a senior manager with a medical background suggested,  
49  
50  
51  
52  
53  
54  
55  
56  
57  
58  
59  
60



1  
2  
3 *'the nurse now knows more than the doctor. So you have to train everybody at the same time'* (District  
4 clinician, KZN).  
5  
6

#### 7 8 *Post-training recommendations* 9

10  
11 Following training, a critical gap raised repeatedly was the absence of *'clinical support'* and *'mentoring'*.  
12  
13 As a district clinician suggested, *'we desperately, desperately need mentors'*. It was emphasised that  
14  
15 even with access to up-to-date, high-quality CPGs, when post-training support is poor, implementation  
16  
17 gaps were likely, as captured by the following quote:  
18  
19

20  
21  
22 *'On-site facility mentoring, it's a problem ... without that, we can have much, much guidelines,*  
23  
24 *good guidelines, but if there's no on-site mentoring, we are just wasting the government's*  
25  
26 *money'* (District clinician, KZN).  
27  
28  
29  
30  
31  
32

### 33 Socio-cultural and geographic challenges to CPG implementation 34 35 36

37  
38 In addition to health-system factors, socio-cultural and geographic factors were raised by most  
39  
40 participants, particularly those in district settings presumably closer to the day-to-day requirements of  
41  
42 health-service delivery. The explanation given was that there is a mismatch between what is  
43  
44 recommended in CPGs and what was acceptable due to culture or feasible in rural settings.  
45  
46  
47  
48

#### 49 **Acceptability and cultural considerations** 50 51

52 Several specific CPGs that posed challenges to implementation were mentioned. For example, the CPG  
53  
54 recommending voluntary male medical circumcision was emphasised as being at odds with cultural  
55  
56  
57  
58  
59  
60

1  
2  
3 beliefs and norms in settings where traditional circumcision required specific rituals. As one female  
4  
5 manager with a nursing background described:  
6

7  
8 *'... male circumcision, it is a taboo for me to talk about circumcision. Now you tell people go and*  
9  
10 *do the medical male circumcision. It is as now you are insulting their culture'* (District manager,  
11  
12 EC).  
13  
14

15  
16 Another example related to when mothers with newborns require follow-up clinic visits after delivery,  
17  
18 whereas, in some traditional cultures, leaving home for a specified period post-delivery is frowned upon:  
19  
20

21  
22 *'After birth, she must stay at home until 10 days'* (District manager, EC).  
23  
24

### 25 **Geographic barriers**

26  
27  
28 Geography also posed barriers to CPG implementation. The distance and difficult environmental  
29  
30 circumstances under which many patients must travel to attend clinic appointments make the  
31  
32 implementation of certain CPG recommendations unfeasible:  
33  
34

35  
36 *'A woman in the Eastern Cape will have to travel 5 kilometres or even more to reach the clinic, so*  
37  
38 *how would you ensure that you reach the clinic 6 days after birth? Those are things that, at*  
39  
40 *times, are impossible when you look at the guidelines'* (District manager, EC).  
41  
42

43  
44 *'... in rural areas, people are scattered, and there are rivers when it is raining, they can't go to*  
45  
46 *that facility ... there was rain for the whole month and then there were floods, and maybe the*  
47  
48 *bridges are then just swept away with the floods. And then people who can't go to that clinic to*  
49  
50 *go and fetch their treatment for diabetes and hypertension'* (Provincial manager, EC).  
51  
52

### One size fits all approach to CPG development

Critically, the disparity between CPG recommendations and their feasibility was perceived to result in unsuccessful CPG implementation and subsequent failure on standardised national indicator 'report cards':

*'Most of the time we will be Number 0 [on audit reports] ...., because it [the guideline] is not implemented in the Eastern Cape. It's not working. But they [national government] will always say Eastern Cape is Number 0. It's Number 0 because the tool does not fit here, it's [the guideline] is just not right, they are using something which is round in a square hole...'* (Provincial manager, EC).

Many provincial managers reported that consultation between national and provincial government was happening, prior to finalisation of a CPG, to address contextual barriers:

*'So I think in terms of implementation what I've seen works really well is when people have been part of the process from the policy development side from the word go'* (Provincial manager, WC).

However, many participants, particularly district managers, did not feel consultations were done consistently and in meaningful ways to ensure that the final CPGs and linked indicators were aligned with geographical and cultural contexts. Many felt that CPG content was 'one size fits all' and that examples of contextually appropriate implementation were limited.

Despite participants emphasising the importance of context, processes for the contextual adaption of CPGs were not routinely described. One exception was an example provided about the structured approach to adopt, adapt, or develop new CPGs in the Western Cape. A provincial manager noted:

1  
2  
3           *'... either use the policy from national as is or we either translate it for the local context or we*  
4  
5           *develop policy, because national just hasn't done it'* (Provincial manager, WC).  
6  
7  
8  
9  
10  
11  
12  
13  
14

## 15   **Discussion**

16  
17   This study explored perspectives of South African provincial and district health managers on potential  
18  
19   barriers to and enablers of primary care CPG implementation. Two major themes emerged. The first  
20  
21   related to broader health-system factors, such as financial constraints, governance and health workforce  
22  
23   capacity gaps. The second emphasised the importance of socio-cultural and geographic factors, and the  
24  
25   need for CPGs to be adapted to fit local contexts.  
26  
27

28  
29  
30  
31   Regarding health-system factors, we found that, despite managers' willingness to support PHC CPG use,  
32  
33   the relative dysfunction of the health system posed barriers to doing so. Aspects of this theme mirrored  
34  
35   several of the often cited WHO health system building blocks, including leadership and governance;  
36  
37   financial arrangements; health service arrangements and implementation strategies, such as training  
38  
39   (47, 48).  
40  
41

42  
43  
44   Strong leadership is required to drive CPG implementation (48, 49). Participants, all of whom occupy  
45  
46   responsible management positions, described governance gaps affecting CPG implementation, a factor  
47  
48   also identified in other studies in sub-Saharan African countries (50). Participants described volumes of  
49  
50   incoming policies without time for consultation, adaptation or planning; and rushed implementation  
51  
52   responding to political drivers rather than healthcare quality considerations. To address this challenge,  
53  
54   managers often partnered with community leaders and NGOs. This was deemed necessary, particularly  
55  
56  
57  
58

1  
2  
3 in the Eastern Cape, a province where many health system and financial issues were emphasised by our  
4 participants and have been highlighted in national reports (4, 7). CPG implementation strategies take  
5 many forms, including professional development, dissemination of summary products to patients and  
6 healthcare providers, use of key opinion leaders, to name a few (24). In the South African setting,  
7 delegating responsibility to partners with relevant skills and resources is necessary, however,  
8 participants were concerned about sustainability of donor-funded activities.  
9  
10  
11  
12  
13  
14  
15

16  
17  
18 Relatedly, accountability was a reported gap, and, in particular, clarity regarding who is responsible for  
19 CPG implementation and how best to monitor success. For monitoring, audit and feedback was  
20 proposed, a quality improvement strategy premised on the notion that clinicians may change their  
21 performance when they receive feedback regarding sub-standard practice (51). Those we spoke to  
22 provided examples of constructive audit and feedback allowing managers to adapt implementation to  
23 address gaps. However, mostly, audits were experienced as punitive, driving managers to '*comply*'  
24 rather than innovate. A systematic review of 49 trials of audit and feedback found that this approach  
25 should benefit CPG implementation (51). Importantly, this review identified success factors that need  
26 be considered, including whether the baseline performance of health professionals is low to start with;  
27 feedback is recurrent and given both verbally and in writing; and, the process includes clear targets and  
28 action plans (51). Our findings suggest that further factors may need to be considered, such as feasibility  
29 and context, to ensure that implementers feel empowered, rather than discouraged or demotivated, by  
30 audit and feedback systems.  
31  
32  
33  
34  
35  
36  
37  
38  
39  
40  
41  
42  
43  
44  
45  
46  
47  
48  
49

50 Most participants described CPG implementation as reactive, rather than proactive, driven by demands  
51 to implement without adequate time or funds to do so effectively. Participants spoke of a '*compliance*  
52 *culture*' and explained that requirements were heavily weighted towards administrative reporting rather  
53  
54  
55  
56  
57  
58  
59  
60

1  
2  
3 than consideration of clinical quality improvement. Within the field of 'quality of care' measurement, a  
4 long-standing model posited by Donabedian proposed three measurable facets of quality of care: 1)  
5 structure (e.g. inputs to care such as facilities, staffing); 2) process (e.g. clinical care); and, 3) outcomes  
6 (e.g. health outcomes, patient satisfaction) (52, 53). In South Africa, the apparent emphasis on structural  
7 measurement, is unlikely to be sufficient, as shown by a multi-country, cross-sectional study in similarly  
8 poor settings which found that infrastructure reports correlated poorly with clinical care or CPG  
9 adherence (54). Drawbacks of this narrower structural and process focus have also been described in  
10 the UK's National Health Service, where attempts to create efficiency resulted in '*compliance-oriented*  
11 *bureaucratised management*' and was felt to hinder rather than enable quality service delivery (55).  
12  
13  
14  
15  
16  
17  
18  
19  
20  
21  
22  
23  
24

25 Financial constraints were identified as critical factors limiting effective CPG implementation. Lack of  
26 basic equipment, and CPG books was described as the norm. Additionally, lack of infrastructure,  
27 including internet or devices, was a perceived barrier to using CPGs. These views mirrored those of PHC  
28 providers in the same districts that we spoke to who described that they would be more likely to use  
29 CPGs if digital access was possible (32). However, like the managers, they perceived lack of internet in  
30 facilities, and exorbitant costs of data required for downloading CPGs, as barriers to digital access (32).  
31  
32  
33  
34  
35  
36  
37  
38  
39  
40

41 Human resource constraints, such as clinical workload and understaffing, was another health-system  
42 issue hindering CPG implementation, a finding that echoes a sub-study of PHC clinical staff in these  
43 districts (32). Training is the mainstay of capacity building for human resources for health. It is vital for  
44 building skills and knowledge to implement CPGs, but is also a form of enablement for teams more  
45 generally. In South Africa, like many low- or middle-income settings, nurses are the backbone of PHC  
46 services. Yet, poor-quality nurse training was a concern, associated with outdated curricula, inaccessible  
47 training sites and a presumed impact on patient care. Similar findings have been reported from other  
48  
49  
50  
51  
52  
53  
54  
55  
56  
57  
58  
59  
60

1  
2  
3 research in South Africa, for example in the context of antenatal care guideline adherence (56). This is a  
4  
5 global challenge, with the WHO recognising the importance of quality health workforce training in  
6  
7 realising UHC (57). One of the contradictions from our findings was that despite training gaps and  
8  
9 primary care provider workload, one of the doctors said that '*nurses know more than doctors*'. This was  
10  
11 in reference to the view that nurses have more training opportunities and are also more motivated to  
12  
13 use current CPGs than doctors. Our previous research with primary care providers supports this finding  
14  
15 of more willingness to use guidelines by nurses, compared to doctors, but further research is needed to  
16  
17 explore this issue (32).  
18  
19  
20  
21  
22

23 To overcome these challenges, many participants pointed to the importance of post-training clinical  
24  
25 mentorship. When in place, this was perceived to provide the necessary, case-based, in-facility support  
26  
27 for CPG implementation and role-modelling of CPG use. This view has been reported by other South  
28  
29 African studies, in particular a study exploring the Ideal Clinic programme implementation suggested  
30  
31 that family doctors in the DCSTs have similar perspectives regarding the importance of mentorship (58,  
32  
33 59).  
34  
35  
36  
37  
38

39 In addition to health-systems issues, the importance of context emerged as a significant theme. Within  
40  
41 the public sector, CPG production in South Africa is generally the responsibility of the National  
42  
43 Department of Health and implementation a provincial mandate, with further devolvement of decision  
44  
45 making to districts (7). This decentralised approach is advocated globally, particularly for health systems  
46  
47 progressing to UHC to enable more responsive, ground-up health services (60). However, we learned  
48  
49 from our participants that the problem with this is two-fold. Firstly, health indicators are aligned with  
50  
51 national strategies, which do not consider differences between provinces. Secondly, local teams lack  
52  
53 time and specific training in the adaptation of the CPGs for their setting. These concerns were also  
54  
55  
56  
57  
58  
59  
60

1  
2  
3 expressed by national primary care CPG developers, who described that the fragmentation between and  
4 within provinces likely hampers implementation (30). According to our participants, implementation of a  
5  
6 'one size fits all' national CPG may result in several negative consequences, including poor scores on  
7  
8 national indicators due to unfeasible recommendations that are not adequately implemented ('round  
9  
10 peg in a square hole' analogy); and rushed implementation to align with a national programme or  
11  
12  
13 political drive.  
14  
15

16  
17  
18 Despite, and perhaps because of, the contextual challenges these managers encountered, many  
19  
20 described innovative approaches to overcome geographic barriers or cultural issues. For example, a  
21  
22 female manager in the Eastern Cape led the development of a male nurse-led programme for medical  
23  
24 male circumcision because in her setting for women to discuss circumcision is a cultural taboo. In  
25  
26 addition, where geographical barriers arose, such as flooding rivers, district managers tried to provide  
27  
28 vehicles and airtime to community healthcare workers to reach patients. This was not always successful,  
29  
30 due to financial barriers and inadequate procurement processes. A number of managers described plans  
31  
32 that required impressive ingenuity and commitment to overcome health system and contextual barriers,  
33  
34 despite all odds, and seemingly with little recognition. Additionally, despite the managers' evident  
35  
36 wealth of knowledge, experience and creative solutions, when pressed, there was a notable absence of  
37  
38 examples provided by participants of opportunities to share lessons learned, innovative approaches, and  
39  
40 successes or challenges between and within districts or provinces.  
41  
42  
43  
44  
45  
46  
47

48 Taken together, these health-system and contextual barriers to CPG implementation are recognised in  
49  
50 various CPG frameworks as potential challenges to implementation (22, 61). However, arguably, those  
51  
52 frameworks, largely developed in higher-income settings, contain more detail regarding the CPG and  
53  
54 healthcare provider characteristics and less regarding the social, political and contextual factors. In  
55  
56  
57  
58



1  
2  
3 South Africa, availability of CPGs and motivation of healthcare providers and managers to support CPG  
4  
5 use are less of an issue than those of context and health systems (32).  
6  
7  
8  
9

#### 10 Implications for policy and practice

11 . In this study, participants made recommendations regarding structural barriers that hinder CPG  
12  
13 implementation and ultimately impact on patient care and its quality, and through these on UHC.  
14  
15 Participants emphasised the importance of strengthening leadership, clarifying roles and putting in place  
16  
17 constructive accountability measures. Skilled nursing and other clinical services are required to address  
18  
19 the health burden, along with the equipment and supplies to deliver their services as recommended by  
20  
21 evidence-informed CPGs. Quality assurance of PHC training programmes, particularly nurses, and  
22  
23 facilitating interdisciplinary training to ensure all staff are adhering to CPGs was suggested. Innovations,  
24  
25 such as the DCSTs, are filling a reported gap in providing clinical mentorship, but these collaborative  
26  
27 working groups need further strengthening. Finally, for effective CPG implementation in health services  
28  
29 to occur, considerations of the unique settings in each province, including culture, geography and social  
30  
31 needs, must be undertaken. Systematic use of available CPG implementation checklists to explore,  
32  
33 understand and plan for implementation will assist to tailor strategies to address local needs, making  
34  
35 best use of limited resources for quality healthcare (22, 25, 61).  
36  
37  
38  
39  
40  
41  
42

#### 43 Limitations

44  
45 Elsewhere we have discussed limitations within the broader SAGE qualitative study (31, 32). In brief,  
46  
47 exploring CPG implementation for all PHC CPGs encompasses a very broad research area. Many PHC  
48  
49 CPGs are available, each likely has different barriers. However, in our exploratory research, we found  
50  
51 many cross-cutting issues such as access, training and supply chain factors. Future research can build on  
52  
53 our findings and identify CPG-specific barriers and enablers. In particular, the thematic area on socio-  
54  
55  
56  
57  
58  
59  
60

1  
2  
3 cultural-geographic issues, although important, included relatively fewer findings. This requires further  
4 exploration with additional participants from various groups including patients and community leaders.  
5  
6  
7 To provide further specific contextual insights.  
8  
9

10  
11  
12 Another potential limitation is the sample, including provincial and district managers in four provinces,  
13 which may not sufficiently capture all views for this sub-group of the health services. Additionally, we  
14 used a mix of purposive and convenience sampling, resulting in inclusion of participants who were more  
15 likely to be available or responsive. Despite this, common themes emerged across provinces and reflect  
16 previous research. As this is not a static situation, research during the evolving process to UHC is  
17 necessary. Moreover, while many of the same themes emerged amongst interviewees, complete data  
18 saturation was not reached in this sub-study. Time and financial restraints prevented further data  
19 collection and additional concepts may have emerged if we had spoken to more people. Further  
20 research amongst this population would thus be potentially useful.  
21  
22  
23  
24  
25  
26  
27  
28  
29  
30  
31  
32  
33

34 Finally, we cannot rule out the possibility of response bias, in which participants respond according to  
35 what they believe we want to hear (43). However, many rich issues emerged from most participants..  
36  
37 Using the individual interview approach may have provided a safe space and achieved the depth that we  
38 have been able to capture and share in this paper.  
39  
40  
41  
42  
43  
44  
45

## 46 **Conclusion**

47  
48 CPGs are amongst the suggested policy tools to achieve evidence-informed, effective and cost-effective  
49 universal healthcare (41). Sub-national health managers reported that health-system challenges, along  
50 with socio-cultural and geographic context, are central issues hampering successful CPG  
51 implementation. Our study adds to a body of knowledge regarding evidence-informed policy  
52  
53  
54  
55  
56  
57  
58  
59  
60

1  
2  
3 implementation. Our participants provide practical insights relevant to primary care CPG  
4  
5 implementation for lower-resourced settings aiming for UHC.  
6  
7  
8  
9  
10  
11

## 12 **List of abbreviations**

|    |      |                                   |
|----|------|-----------------------------------|
| 14 | CPG  | Clinical practice guideline       |
| 15 |      |                                   |
| 16 | DCST | District Clinical Specialist Team |
| 17 |      |                                   |
| 18 | EC   | Eastern Cape                      |
| 19 |      |                                   |
| 20 | HIV  | Human immunodeficiency virus      |
| 21 |      |                                   |
| 22 | KZN  | KwaZulu-Natal                     |
| 23 |      |                                   |
| 24 | LP   | Limpopo                           |
| 25 |      |                                   |
| 26 | PHC  | Primary healthcare                |
| 27 |      |                                   |
| 28 | UHC  | Universal health coverage         |
| 29 |      |                                   |
| 30 | WC   | Western Cape                      |
| 31 |      |                                   |
| 32 |      |                                   |
| 33 |      |                                   |
| 34 |      |                                   |
| 35 |      |                                   |
| 36 |      |                                   |

## 37 **Declarations**

### 38 *Ethics approval and consent to participate*

39  
40  
41 The study was approved by the Research Ethics Committees of the South African Medical Research  
42 Council (EC002-2/2014) and Stellenbosch University (N14/02/008). The informed-consent form was sent  
43  
44 to the individuals prior to the interviews and was also explained and confirmed at the start of  
45  
46 interviews. All participants provided individual written informed consent. The names of participants  
47  
48 have been captured but are saved with restricted access. We referred to the Consolidated criteria for  
49  
50 reporting qualitative research (COREQ) to ensure comprehensive reporting (36).  
51  
52  
53  
54  
55  
56  
57  
58  
59  
60

1  
2  
3 *Consent for publication*  
4

5 Not applicable  
6  
7  
8  
9

10 *Availability of data and material*  
11

12 The datasets generated and/or analysed during the study are not publicly available as these may be  
13 linked to specific health managers interviewed and as such are not available as open-use data.  
14

15 Should anyone wish to have access or is interested in further exploration of the data, you may contact  
16 the author: [tamara.kredo@mrc.ac.za](mailto:tamara.kredo@mrc.ac.za).  
17  
18  
19  
20  
21  
22

23 *Competing interests*  
24

25 TK has contributed evidence to the National Department of Health Essential Drugs List Adult level  
26 standard treatment guideline (non-funded); and facilitated workshops and capacity development for  
27 under and post-graduate students, researchers, policymakers and practitioners on clinical practice  
28 guidelines and evidence-informed practices. JV has been involved in guideline development globally and  
29 regionally, he has been on advisory committees for clinical guidelines in the Western Province and has  
30 facilitated workshops and capacity development for under- and postgraduate students, researchers and  
31 practitioners on clinical practice guidelines and evidence-informed practices. SC, SA, AA, BS and JM have  
32 no competing interests to declare.  
33  
34  
35  
36  
37  
38  
39  
40  
41  
42

43 No financial competing interests to declare for any contributors to this research.  
44  
45  
46  
47

48 *Funding*  
49

50 This research is supported through a grant from the Flagships Awards Project by the South African  
51 Medical Research Council (SAMRC-RFA-IFSP-01-2013/ SAGE).  
52  
53  
54  
55  
56  
57  
58

### *Authors' contributions*

TK drafted the protocol, with input from JV and AA, amongst others involved with the initial SAGE project. TK, AA and JM were involved with data collection. TK, SA, JV, AA, JM, SC and BM contributed to discussions regarding analysis of findings. TK drafted the manuscript, with input from all authors. All authors approved the final version of the manuscript.

### *Acknowledgements*

We would like to thank all those who participated in the research, giving us time from their management duties and helping us to understand the clinical guideline implementation landscape in South Africa. Many thanks also to several Cochrane South Africa staff and researchers who assisted with the project including Tebogo Mokganyetji, Karen Daniels, Michelle Galloway and Joy Oliver.

### **References**

1. World Health Organization. The World Health Report 2008: Primary Health Care: (Now More than Ever) Geneva:: World Health Organization; 2008 [Available from: <https://www.who.int/whr/2008/en/>].
2. World Health Organization and the United Nations Children's Fund (UNICEF), editor Declaration of Astana. Global Conference on Primary Health Care; 2018; Astana, Kazakhstan 2018.
3. World Health Organization and International Bank for Reconstruction and Development / The World Bank. Tracking Universal Health Coverage: 2017 Global Monitoring Report. Switzerland; 2017.
4. Kautzky K, Tollman SM. A perspective on Primary Health Care in South Africa : Primary Health Care : in context. South African Health Review. 2008;2008(1):17-30.
5. Department of Health SA. Strategic Plan: Department of Health 2014/2015 - 2018/2019. In: Department of Health, editor. Pretoria: Government; 2014.
6. Pillay-van Wyk V, Msemburi W, Laubscher R, Dorrington RE, Groenewald P, Glass T, et al. Mortality trends and differentials in South Africa from 1997 to 2012: second National Burden of Disease Study. The Lancet Global health. 2016;4(9):e642-53.
7. Mayosi BM, Lawn JE, van Niekerk A, Bradshaw D, Abdool Karim SS, Coovadia HM. Health in South Africa: changes and challenges since 2009. Lancet. 2012;380(9858):2029-43.
8. Minister of Health. National Health Insurance Bill Pretoria, South Africa 2018 [Available from: [https://www.gov.za/sites/default/files/gcis\\_document/201806/41725gon635s.pdf](https://www.gov.za/sites/default/files/gcis_document/201806/41725gon635s.pdf)].
9. Rispel L. Analysing the progress and fault lines of health sector transformation in South Africa. 2016. In: South African Health Review 2016+

[Internet]. Durban: Health Systems Trust. Available from: <http://www.hst.org.za/publications/south-african-health-review-2016>.

10. National Treasury. Inter-governmental Fiscal reviews - Provincial Budgets and Expenditure Review: 2010/11 - 2016/17. Pretoria: National Treasury of the Republic of South Africa; 2015.
11. Naledi T BP, Schneider H. Primary Health Care in SA since 1994 and Implications of the New Vision for PHC reengineering. In: Padarath A ER, editor. South African Health Review 2011. Durban: Health Systems Trust; 2011.
12. World Health Organization. WHO Handbook for guideline development 2008 January 2011; (August 2010). Available from: [http://www.searo.who.int/LinkFiles/RPC\\_Handbook\\_Guideline\\_Development.pdf](http://www.searo.who.int/LinkFiles/RPC_Handbook_Guideline_Development.pdf).
13. Kredt T, Bernhardsson S, Machingaidze S, Young T, Louw Q, Ochodo E, et al. Guide to clinical practice guidelines: the current state of play. *Int J Qual Health Care*. 2016;28(1):122-8.
14. Wilkinson M, Wilkinson T, Kredt T, MacQuilkan K, Mudara C, Winch A, et al. South African clinical practice guidelines: A landscape analysis. *S Afr Med J*. 2017;108(1):23-7.
15. Spyridonidis D, Calnan M. Opening the black box: A study of the process of NICE guidelines implementation. *Health Policy*. 2011;102(2-3):117-25.
16. Runciman WB, Hunt TD, Hannaford NA, Hibbert PD, Westbrook JI, Coiera EW, et al. CareTrack: assessing the appropriateness of health care delivery in Australia. *Med J Aust*. 2012;197(2):100-5.
17. Ncube NB, Solanki GC, Kredt T, Lalloo R. Antibiotic prescription patterns of South African general medical practitioners for treatment of acute bronchitis. *S Afr Med J*. 2017;107(2):119-22.
18. Mash B, Rhode H, Pather M, Ainslie G, Irusen E, Bheekie A, et al. Quality of asthma care: Western Cape province, South Africa. *S Afr Med J*. 2009;99(12):892-6.
19. Grol R, Wensing M, Eccles M, Davis D. *Improving Patient Care: The Implementation of Change in Health Care*. Second Edition ed. United Kingdom: John Wiley & Sons, Ltd; 2013.
20. Grimshaw J, Thomas R, MacLennan G, Fraser C, Ramsay C. Effectiveness and efficiency of guideline dissemination and implementation strategies. *Health Technology Assessment*. 2004;8(6):84.
21. Schünemann HJ, Wiercioch W, Etzeandía I, Falavigna M, Santesso N, Mustafa R, et al. Guidelines 2.0: systematic development of a comprehensive checklist for a successful guideline enterprise. *Canadian Medical Association Journal*. 2014;186(3):E123-E42.
22. Gagliardi AR, Marshall C, Huckson S, James R, Moore V. Developing a checklist for guideline implementation planning: review and synthesis of guideline development and implementation advice. *Implementation Science*. 2015;10(1):19.
23. Gagliardi AR, Brouwers MC, Palda VA, Lemieux-Charles L, Grimshaw JM. How can we improve guideline use? A conceptual framework of implementability. *Implement Sci*. 2011;6:26.
24. Pantoja T, Opiyo N, Lewin S, Paulsen E, Ciapponi A, Wiysonge CS, et al. Implementation strategies for health systems in low-income countries: an overview of systematic reviews. *Cochrane Database Syst Rev*. 2017;9:CD011086.
25. Baker R, Camosso-Stefinovic J, Gillies C, Shaw EJ, Cheater F, Flottorp S, et al. Tailored interventions to address determinants of practice. *Cochrane Database of Systematic Reviews*. 2015(4).
26. Michie S, van Stralen MM, West R. The behaviour change wheel: a new method for characterising and designing behaviour change interventions. *Implement Sci*. 2011;6:42.
27. French SD, McKenzie JE, O'Connor DA, Grimshaw JM, Mortimer D, Francis JJ, et al. Evaluation of a theory-informed implementation intervention for the management of acute low back pain in general medical practice: the IMPLEMENT cluster randomised trial. *PLoS One*. 2013;8(6):e65471.
28. Fairall L, Cornick R, Bateman E. Empowering frontline providers to deliver universal primary healthcare using the Practical and Approach to care kit. *BMJ Global Health*. 2018;3(Suppl 5):bmjgh-2018-k4451rep.

- 1  
2  
3 29. Young T, Garner P, Clarke M, Volmink J. Evidence-based health care and policy in Africa: past,  
4 present, and future. *J Clin Epidemiol*. 2016.  
5 30. Kredo T, Abrams A, Young T, Louw Q, Volmink J, Daniels K. Primary care clinical practice  
6 guidelines in South Africa: qualitative study exploring perspectives of national stakeholders. *BMC Health  
7 Serv Res*. 2017;17(1):608.  
8 31. Kredo T, Cooper S, Abrams A, Daniels K, Volmink J, Atkins S. National stakeholders' perceptions  
9 of the processes that inform the development of national clinical practice guidelines for primary  
10 healthcare in South Africa. *Health Res Policy Syst*. 2018;16(1):68.  
11 32. Kredo T, Cooper S, Abrams A, Muller J, Volmink J, Atkins S. Using the behavior change wheel to  
12 identify barriers to and potential solutions for primary care clinical guideline use in four provinces in  
13 South Africa. *BMC Health Services Research*. 2018;18(1):965.  
14 33. Dizon JM, Grimmer K, Louw Q, Machingaidze S, Parker H, Pillen H. Barriers and enablers for the  
15 development and implementation of allied health clinical practice guidelines in South African primary  
16 healthcare settings: a qualitative study. *Health Research Policy and Systems*. 2017;15(1):79.  
17 34. Dizon JM, Grimmer K, Machingaidze S, McLaren P, Louw Q. Mapping South African allied health  
18 primary care clinical guideline activity: establishing a stakeholder reference sample. *Health Res Policy  
19 Syst*. 2016;14(1):77.  
20 35. Dizon JM, Grimmer KA, Machingaidze S, Louw QA, Parker H. South African primary health care  
21 allied health clinical practice guidelines: the big picture. *BMC Health Serv Res*. 2018;18(1):48.  
22 36. Louw Q, Dizon JM, Grimmer K, McCaul M, Kredo T, Young T. Building capacity for development  
23 and implementation of clinical practice guidelines. *S Afr Med J*. 2017;107(9):745-6.  
24 37. Statistics South Africa. Mid-year population estimates Pretoria, South Africa,  
25 <http://www.statssa.gov.za/>; 2019 2019. Contract No.: P0302.  
26 38. The World Bank. South Africa - overview  
27 <https://www.worldbank.org/en/country/southafrica/overview2019> [  
28 39. Day C, Gray, A. . Health and related indicators. In: Padarath. A B, P., editor. *South African Health  
29 Review Durban, South Africa: Health Systems Trust; 2017. p. 217-340.*  
30 40. Department of Health SA. White Paper for the Transformation of the Health System in South  
31 Africa #17910. In: Department of Health, editor. Pretoria 1997.  
32 41. Department of Health SA. National Health Insurance for South Africa - towards universal health  
33 coverage (White Paper). In: Department of Health, editor. Pretoria: Government; 2015.  
34 42. Department of Health. *Ideal Clinic South Africa* [Available from: <https://www.idealclinic.org.za>.  
35 43. Green J, Thorogood N. *Qualitative Methods for Health Research*. Third ed. Silverman D, editor.  
36 London: SAGE; 2004.  
37 44. Graneheim UH, Lundman B. Qualitative content analysis in nursing research: concepts,  
38 procedures and measures to achieve trustworthiness. *Nurse Education Today*. 2003;24(2):105-12.  
39 45. Saldana J. *The coding manual for qualitative researchers*. Los Angeles, CA: SAGE; 2009  
40 46. Malterud K. *Qualitative research: standards, challenges, and guidelines*. The  
41 *Lancet*.358(9280):483-8.  
42 47. Health systems evidence: Taxonomy of governance, financial and delivery arrangements and  
43 implementation strategies within health systems [Internet]. McMaster Health Forum. 2017 [cited 17  
44 February 2019]. Available from: [https://www.mcmasterforum.org/docs/default-  
45 source/resources/hse\\_taxonomy.pdf?sfvrsn=4](https://www.mcmasterforum.org/docs/default-source/resources/hse_taxonomy.pdf?sfvrsn=4).  
46 48. World Health Organization. *Monitoring the building blocks of health systems: a handbook of  
47 indicators and their measurement strategies*. Geneva, Switzerland: World Health Organization; 2010.  
48 Available from: <https://www.who.int/healthinfo/systems/monitoring/en/>.



- 1  
2  
3  
4  
5  
6  
7  
8  
9  
10  
11  
12  
13  
14  
15  
16  
17  
18  
19  
20  
21  
22  
23  
24  
25  
26  
27  
28  
29  
30  
31  
32  
33  
34  
35  
36  
37  
38  
39  
40  
41  
42  
43  
44  
45  
46  
47  
48  
49  
50  
51  
52  
53  
54  
55  
56  
57  
58  
59  
60
49. Herrera CA, Lewin S, Paulsen E, Ciapponi A, Opiyo N, Pantoja T, et al. Governance arrangements for health systems in low-income countries: an overview of systematic reviews. *Cochrane Database Syst Rev.* 2017;9:CD011085.
50. Ngidi WH, Naidoo JR, Ncama BP, Luvuno ZPB, Mashamba-Thompson TP. Mapping evidence of interventions and strategies to bridge the gap in the implementation of the prevention of mother-to-child transmission of HIV programme policy in sub-Saharan countries: A scoping review. 2017. 2017;9(1).
51. Ivers N, Jamtvedt G, Flottorp S, Young JM, Odgaard-Jensen J, French SD, et al. Audit and feedback: effects on professional practice and healthcare outcomes. *Cochrane Database Syst Rev.* 2012(6):CD000259.
52. Donabedian A. The Quality of Care: How Can It Be Assessed? *JAMA.* 1988;260(12):1743-8.
53. M Campbell S, Roland M, Buetow S. Defining Quality of Care 2001. 1611-25 p.
54. Leslie HH, Sun Z, Kruk ME. Association between infrastructure and observed quality of care in 4 healthcare services: A cross-sectional study of 4,300 facilities in 8 countries. *PLOS Medicine.* 2017;14(12):e1002464.
55. Dixon-Woods M, Baker R, Charles K, Dawson J, Jerzembek G, Martin G, et al. Culture and behaviour in the English National Health Service: overview of lessons from a large multimethod study. *BMJ quality & safety.* 2014;23(2):106-15.
56. Patience NTS, Sibiyi NM, Gwele NS. Evidence of application of the Basic Antenatal Care principles of good care and guidelines in pregnant women's antenatal care records. 2016. 2016;8(2).
57. World Health Organization. Global strategy on human resources for health: workforce 2030. Geneva, Switzerland 2016. Report No.: ISBN 978 92 4 151113 1
58. Nkosi ZZ, Asah F, Pillay P. Post-basic nursing students' access to and attitudes toward the use of information technology in practice: a descriptive analysis. *Journal of nursing management.* 2011;19(7):876-82.
59. Department of Health SA. Ideal Clinic- Components and Definition. In: Department of Health, editor. Pretoria: Government; 2014.
60. Cobos Munoz D, Merino Amador P, Monzon Llamas L, Martinez Hernandez D, Santos Sancho JM. Decentralization of health systems in low and middle income countries: a systematic review. *Int J Public Health.* 2017;62(2):219-29.
61. Flottorp SA, Oxman AD, Krause J, Musila NR, Wensing M, Godycki-Cwirko M, et al. A checklist for identifying determinants of practice: a systematic review and synthesis of frameworks and taxonomies of factors that prevent or enable improvements in healthcare professional practice. *Implement Sci.* 2013;8:35.



## Guideline implementation

### Supplementary file 1. Interview schedule for semi-structured interviews

|                                                                                                                            |                                                                                                                                          |
|----------------------------------------------------------------------------------------------------------------------------|------------------------------------------------------------------------------------------------------------------------------------------|
| 1<br>2<br>3<br>4<br>5<br>6<br>7<br>8<br>9<br>10<br>11<br>12<br>13                                                          | BACKGROUND QUESTION: what is your experience and understanding of what a guideline is or does?                                           |
| 14<br>15<br>16<br>17                                                                                                       | 1. What is your context (role, position) as it links to clinical practice guidelines?                                                    |
| 18<br>19<br>20<br>21<br>22<br>23                                                                                           | 2. What processes of primary care clinical practice guideline development, contextualisation, adapting, and implementation are in place? |
| 24<br>25<br>26<br>27                                                                                                       | 3. Who is involved/ role players?                                                                                                        |
| 28<br>29<br>30<br>31<br>32<br>33                                                                                           | 4. What works for clinical guideline development? What could be better? (if relevant to the informant)                                   |
| 34<br>35<br>36<br>37<br>38<br>39                                                                                           | 5. What works for clinical guideline implementation? What could be better? (if relevant to the informant)                                |
| 40<br>41<br>42<br>43<br>44<br>45<br>46<br>47<br>48<br>49<br>50<br>51<br>52<br>53<br>54<br>55<br>56<br>57<br>58<br>59<br>60 | 6. If we want to know more, who should we speak to?                                                                                      |

Consolidated criteria for reporting qualitative research (COREQ): a 32-item checklist for interviews and focus groups

SAGE provincial managers paper

31 October 2019

| No / Item                                      | Guide questions/description                                                                              | Section in paper                                                                                                                                                                                                                          |
|------------------------------------------------|----------------------------------------------------------------------------------------------------------|-------------------------------------------------------------------------------------------------------------------------------------------------------------------------------------------------------------------------------------------|
| <b>Domain 1: Research team and reflexivity</b> |                                                                                                          |                                                                                                                                                                                                                                           |
| <b>Personal Characteristics</b>                |                                                                                                          |                                                                                                                                                                                                                                           |
| 1. Interviewer/facilitator                     | Which author/s conducted the interview or focus group?                                                   | Details provided in methods and in previous publications. See section on 'data collection and management'                                                                                                                                 |
| 2. Credentials                                 | What were the researcher's credentials? E.g. PhD, MD                                                     | Provided in methods – not provided in detail, but provided in 'data collection and management' section of methods                                                                                                                         |
| 3. Occupation                                  | What was their occupation at the time of the study?                                                      | Outlined in methods.                                                                                                                                                                                                                      |
| 4. Gender                                      | Was the researcher male or female?                                                                       | Not mentioned in the manuscript. Interview teams were all female, and the research team included both sexes. However, given the interviews were with senior managers, the sex of the interview team was not deemed of central importance. |
| 5. Experience and training                     | What experience or training did the researcher have?                                                     | Outlined in methods – training was provided for interviewing, along with mentoring of the lead interviewer TK. Further, post interview reflection enabled learning and enhanced practice.                                                 |
| <b>Relationship with participants</b>          |                                                                                                          |                                                                                                                                                                                                                                           |
| 6. Relationship established                    | Was a relationship established prior to study commencement?                                              | In the methods section we refer to the sampling approach which was purposive, not prior relationships existed.                                                                                                                            |
| 7. Participant knowledge of the interviewer    | What did the participants know about the researcher? e.g. personal goals, reasons for doing the research | See point 6 above - no prior relationship.                                                                                                                                                                                                |
| 8. Interviewer characteristics                 | What characteristics were reported about the                                                             | The details regarding the interviewers/ researches is                                                                                                                                                                                     |

|                                          |                                                                                                                                                          |                                                                                                                                                                                                                     |
|------------------------------------------|----------------------------------------------------------------------------------------------------------------------------------------------------------|---------------------------------------------------------------------------------------------------------------------------------------------------------------------------------------------------------------------|
|                                          | interviewer/facilitator? e.g. Bias, assumptions, reasons and interests in the research topic                                                             | reported in the section on 'data collection and management'. This includes reference to their training and the interdisciplinary mix of researchers.                                                                |
| <b>Domain 2: study design</b>            |                                                                                                                                                          |                                                                                                                                                                                                                     |
| <b>Theoretical framework</b>             |                                                                                                                                                          |                                                                                                                                                                                                                     |
| 9. Methodological orientation and Theory | What methodological orientation was stated to underpin the study? e.g. grounded theory, discourse analysis, ethnography, phenomenology, content analysis | This appears in the methods section along with detailed reporting of the process.                                                                                                                                   |
| <b>Participant selection</b>             |                                                                                                                                                          |                                                                                                                                                                                                                     |
| 10. Sampling                             | How were participants selected? e.g. purposive, convenience, consecutive, snowball                                                                       | Within the methods section, we outline that both purposive sampling (for the participants role in guideline implementation) and convenience sampling (where specific people were suggested and available) was used. |
| 11. Method of approach                   | How were participants approached? e.g. face-to-face, telephone, mail, email                                                                              | Included in methods section. We describe the face to face semi-structured interviews.                                                                                                                               |
| 12. Sample size                          | How many participants were in the study?                                                                                                                 | Reported in results section in narrative and table.                                                                                                                                                                 |
| 13. Non-participation                    | How many people refused to participate or dropped out? Reasons?                                                                                          | Included in methods – there was no non-participation. All agreed to participate, none dropped out or refused.                                                                                                       |
| <b>Setting</b>                           |                                                                                                                                                          |                                                                                                                                                                                                                     |
| 14. Setting of data collection           | Where was the data collected? e.g. home, clinic, workplace                                                                                               | Provided in methods and previous publications – all interviews took place in work place, except one telephone call that was chosen for convenience for the participant.                                             |
| 15. Presence of non-participants         | Was anyone else present besides the participants and researchers?                                                                                        | Not included, as there were no non-participants, all were interviewed following informed consent.                                                                                                                   |
| 16. Description of sample                | What are the important characteristics of the sample? e.g. demographic data, date                                                                        | Relevant details provided in methods – however, only basics regarding their role,                                                                                                                                   |

|                                        |                                                                                                                                   |                                                                                                                                                                           |
|----------------------------------------|-----------------------------------------------------------------------------------------------------------------------------------|---------------------------------------------------------------------------------------------------------------------------------------------------------------------------|
|                                        |                                                                                                                                   | professional background and sex were gathered                                                                                                                             |
| <b>Data collection</b>                 |                                                                                                                                   |                                                                                                                                                                           |
| 17. Interview guide                    | Were questions, prompts, guides provided by the authors? Was it pilot tested?                                                     | Approach outlined in methods and guide provided in appendix. The semi-structured guide informed the interviews, was also adapted iteratively as the interviews proceeded. |
| 18. Repeat interviews                  | Were repeat interviews carried out? If yes, how many?                                                                             | n/a                                                                                                                                                                       |
| 19. Audio/visual recording             | Did the research use audio or visual recording to collect the data?                                                               | We used digital recordings which is described in methods section.                                                                                                         |
| 20. Field notes                        | Were field notes made during and/or after the interview or focus group?                                                           | Reported in methods - We captured some field notes, and also post-interview reflections on the data and process of the interviews.                                        |
| 21. Duration                           | What was the duration of the interviews or focus group?                                                                           | Described in methods – approximately 60 – 90 minutes                                                                                                                      |
| 22. Data saturation                    | Was data saturation discussed?                                                                                                    | This is mentioned in the discussion, under study limitations.                                                                                                             |
| 23. Transcripts returned               | Were transcripts returned to participants for comment and/or correction?                                                          | Not done                                                                                                                                                                  |
| <b>Domain 3: analysis and findings</b> |                                                                                                                                   |                                                                                                                                                                           |
| <b>Data analysis</b>                   |                                                                                                                                   |                                                                                                                                                                           |
| 24. Number of data coders              | How many data coders coded the data?                                                                                              | Details of analysis in methods – the lead researcher did the coding.                                                                                                      |
| 25. Description of the coding tree     | Did authors provide a description of the coding tree?                                                                             | Not provided here                                                                                                                                                         |
| 26. Derivation of themes               | Were themes identified in advance or derived from the data?                                                                       | Described in methods, the codes were derived from data inductively.                                                                                                       |
| 27. Software                           | What software, if applicable, was used to manage the data?                                                                        | Not used                                                                                                                                                                  |
| 28. Participant checking               | Did participants provide feedback on the findings?                                                                                | Not done                                                                                                                                                                  |
| <b>Reporting</b>                       |                                                                                                                                   |                                                                                                                                                                           |
| 29. Quotations presented               | Were participant quotations presented to illustrate the themes / findings? Was each quotation identified? e.g. participant number | Several quotations are included with an identifier to illustrate the data.                                                                                                |

|                                  |                                                                        |                                                                          |
|----------------------------------|------------------------------------------------------------------------|--------------------------------------------------------------------------|
| 30. Data and findings consistent | Was there consistency between the data presented and the findings?     | Aligned throughout the manuscript to ensure the results reflect the data |
| 31. Clarity of major themes      | Were major themes clearly presented in the findings?                   | In results - outlined major themes and categories                        |
| 32. Clarity of minor themes      | Is there a description of diverse cases or discussion of minor themes? | Results section - differing views are included.                          |

For peer review only
