# Supplementary material for: ‘Building on shaky ground’—challenges to and solutions for primary care guideline implementation in four provinces in South Africa: a qualitative study
Source: PubMed Central journal article supplement — BMJ Open. 2020 May 30;10(5):e031468. doi: 10.1136/bmjopen-2019-031468 (PMC7264636; doi:10.1136/bmjopen-2019-031468), 2020-05-30
Supplement: bmjopen-2019-031468supp001.pdf [file bmjopen-2019-031468supp001.pdf]

## Guideline implementation

## Supplementary file 1. Interview schedule for semi-structured interviews

|                                                                                                                                          |
|------------------------------------------------------------------------------------------------------------------------------------------|
| BACKGROUND QUESTION: what is your experience and understanding of what a guideline is or does?                                           |
| 1. What is your context (role, position) as it links to clinical practice guidelines?                                                    |
| 2. What processes of primary care clinical practice guideline development, contextualisation, adapting, and implementation are in place? |
| 3. Who is involved/ role players?                                                                                                        |
| 4. What works for clinical guideline development? What could be better? (if relevant to the informant)                                   |
| 5. What works for clinical guideline implementation? What could be better? (if relevant to the informant)                                |
| 6. If we want to know more, who should we speak to?                                                                                      |
